# Supplementary material for: TBHP-promoted multicomponent reaction to access 2-aminobenzoxazinones using sodium chlorodifluoroacetate as the C1 synthon
Source: Royal Society of Chemistry journal article supplement (doi:10.1039/d3qo00157a), 2023-01-01
Supplement: d3qo00157a1.pdf [file d3qo00157a1.pdf]

## *Electronic Supplementary Information*

### **TBHP-promoted Multicomponent Reaction to Access 2-Aminobenzoxazinones using Sodium Chlorodifluoroacetate as C1 Synthone**

Huijuan Li, Yongfeng Wang, Cheng Xu\*, Jingwen Zou, Yaxuan Wu, and Guodong Yin\*

*College of Chemistry and Chemical Engineering, Hubei Key Laboratory of Pollutant Analysis and*

*Reuse Technology, Hubei Normal University, Huangshi 435002, P. R. China*

*E-mail: chemxucheng@hbnu.edu.cn; gdyin@hbnu.edu.cn*

### **Table of Contents**

|                                                                     |         |
|---------------------------------------------------------------------|---------|
| 1. General information.....                                         | S2      |
| 2. General procedure for the synthesis of products <b>4-8</b> ..... | S2      |
| 3. Scale-up synthesis of product <b>4a</b> .....                    | S2      |
| 4. Evidence in support of the mechanism.....                        | S3      |
| 5. Crystal data of product <b>5a</b> .....                          | S4      |
| 6. Characterization data for products <b>4-8</b> .....              | S5-S22  |
| 7. NMR spectroscopic data for products <b>4-8</b> .....             | S23-S67 |

## 1. General information

The chemicals were commercially available without further purification. Reactions were monitored by TLC analysis. Flash column chromatography was performed over silica gel (200-300 mesh).  $^1\text{H}$  spectra were recorded in  $\text{CDCl}_3$  on Bruker Avance II 300 MHz NMR spectrometers and resonances ( $\delta$ ) are given in parts per million relative to tetramethylsilane. Data are reported as follows: chemical shift, multiplicity (s = singlet, d = doublet, t = triplet, m = multiplet), coupling constants (Hz) and integration.  $^{13}\text{C}$  spectra were recorded in  $\text{CDCl}_3$  on 75 MHz NMR spectrometers and resonances ( $\delta$ ) are given in ppm. IR spectra were obtained as KBr pellet samples using a Nicolet 5700 FTIR spectrometer. Melting points were determined using an uncorrected X-4 apparatus. HRMS were obtained on an Agilent QTOF 6540 MS/Thermo Scientific LTQ Orbitrap XL equipped with an electrospray source. The X-ray crystal structure determination was performed using a Bruker SMART APEX CCD system.

## 2. General procedure for the synthesis of products 4-8

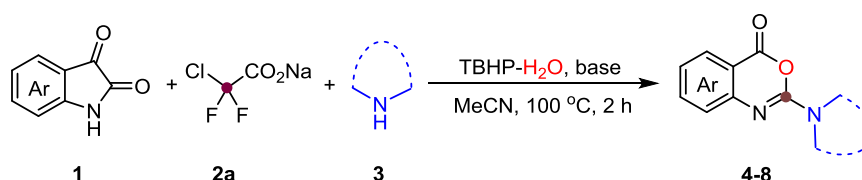

TBHP (70% in H<sub>2</sub>O) (0.75 mmol, 1.5 equiv) was added to a mixture of isatin (**1**, 0.5 mmol, 1.0 equiv), ClCF<sub>2</sub>COONa (**2a**, 1.5 mmol, 3.0 equiv), K<sub>3</sub>PO<sub>4</sub> or Cs<sub>2</sub>CO<sub>3</sub> (1.0 mmol, 2.0 equiv), and amine (**3**, 0.5 mmol, 1.0 equiv) in CH<sub>3</sub>CN (3 mL). Then the sealed tube was stirred at 100 °C for 2 h. Upon completion of the reaction, the solvent was evaporated under reduced pressure and the residue was purified by flash column chromatograph (silica gel, petroleum ether : EtOAc = 10:1~50:1, v/v) to give the products **4-8**.

## 3. Scale-up synthesis of product 4a

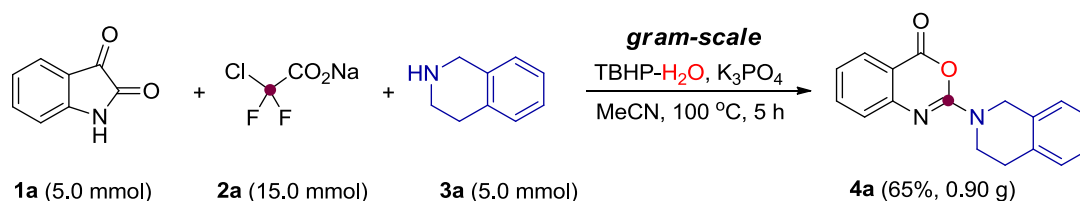

A 100 mL sealed tube was charged with isatin (**1a**) (0.74 g, 5.0 mmol), ClCF<sub>2</sub>COONa (**2a**) (2.29 g, 15.0 mmol), 1,2,3,4-tetrahydroisoquinoline (**3a**) (0.67 g, 5.0 mmol), K<sub>3</sub>PO<sub>4</sub> (2.12 g, 10.0 mmol), then CH<sub>3</sub>CN (30 mL) and TBHP (70% in H<sub>2</sub>O) (0.97 g, 7.5 mmol) was added. The resulting mixture was stirred at 100 °C for 5 h. Upon completion of the reaction, the solvent was evaporated under reduced pressure and the residue was purified by flash column chromatograph (silica gel, petroleum ether : EtOAc = 10:1, v/v) to give the desired product **4a** as a white solid (0.90 g, 65% yield).

## 4. Evidence in support of the mechanism

The  $^{18}\text{O}$ -labeling experiment was examined to investigate the source of oxygen of product **5b**. The experimental result suggests that  $\text{H}_2^{18}\text{O}$  participates in this ring construction process, and the 3-position oxygen atom of lactone originates from  $\text{H}_2^{18}\text{O}$ , and the ratio of **5b**- $^{16}\text{O}$ :**5b**- $^{18}\text{O}$  is 3:1 determined by EI-MS.

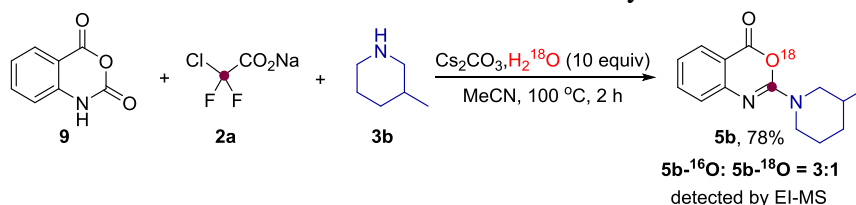

The EI-MS Spectra is listed below:

LHJ-086 #230 RT: 0.81 AV: 1 NL: 1.34E8  
T: + c EI Full ms [30.00-500.00]

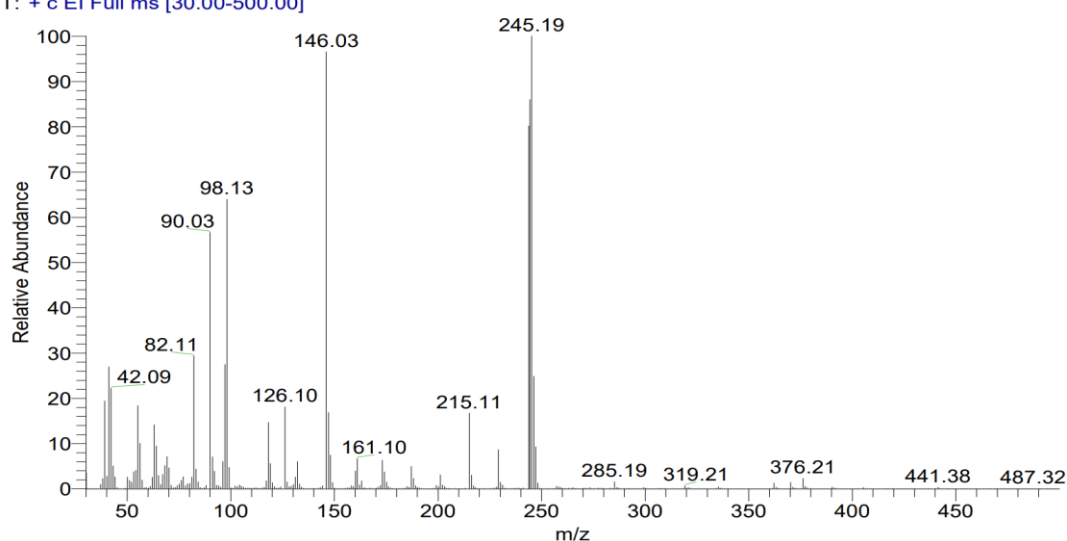

LHJ-086 #230 RT: 0.81 AV: 1 NL: 1.34E8  
T: + c EI Full ms [30.00-500.00]

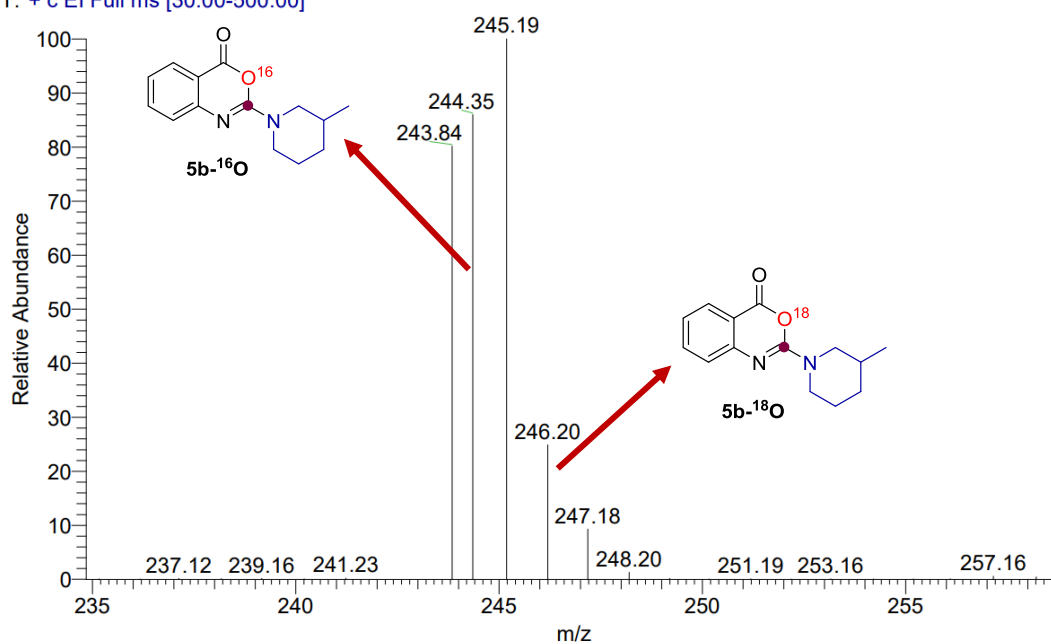

## 5. Crystal data of product 5a

|                                   |                                                                                                                                                              |
|-----------------------------------|--------------------------------------------------------------------------------------------------------------------------------------------------------------|
| Empirical formula                 | C <sub>13</sub> H <sub>14</sub> N <sub>2</sub> O <sub>2</sub> (CCDC: 2166162)                                                                                |
| Formula weight                    | 230.26                                                                                                                                                       |
| Temperature                       | 296(2) K                                                                                                                                                     |
| Wavelength                        | 0.71073 Å                                                                                                                                                    |
| Crystal system                    | Monoclinic                                                                                                                                                   |
| Space group                       | P2(1)/c                                                                                                                                                      |
| Unit cell dimensions              | $a = 9.637(8) \text{ \AA}$ $\alpha = 90^\circ$<br>$b = 11.436(9) \text{ \AA}$ $\beta = 113.063(18)^\circ$<br>$c = 11.619(9) \text{ \AA}$ $\gamma = 90^\circ$ |
| Volume                            | 1178.2 (16) Å <sup>3</sup>                                                                                                                                   |
| Z                                 | 4                                                                                                                                                            |
| Density (calculated)              | 1.298 mg/m <sup>3</sup>                                                                                                                                      |
| Absorption coefficient            | 0.089 mm <sup>-1</sup>                                                                                                                                       |
| $F(000)$                          | 488                                                                                                                                                          |
| Crystal size                      | 0.200 × 0.200 × 0.200 mm <sup>3</sup>                                                                                                                        |
| Theta range for data collection   | 2.608 to 25.065 °                                                                                                                                            |
| Index ranges                      | -11 ≤ h ≤ 11, -13 ≤ k ≤ 13                                                                                                                                   |
| Reflections collected             | 17307                                                                                                                                                        |
| Independent reflections           | 2084 [R(int) = 0.0918]                                                                                                                                       |
| Completeness to theta = 25.00°    | 99.3 %                                                                                                                                                       |
| Absorption correction             | Semi-empirical from equivalents                                                                                                                              |
| Max. and min. transmission        | 0.982 and 0.982                                                                                                                                              |
| Refinement method                 | Full-matrix least-squares on F <sup>2</sup>                                                                                                                  |
| Data / restraints / parameters    | 2084/0/154                                                                                                                                                   |
| Goodness-of-fit on F <sup>2</sup> | 1.017                                                                                                                                                        |
| Final R indices [I > 2σ(I)]       | R <sub>1</sub> = 0.0535, wR <sub>2</sub> = 0.1203                                                                                                            |
| R indices (all data)              | R <sub>1</sub> = 0.1328, wR <sub>2</sub> = 0.1597                                                                                                            |
| Largest diff. peak and hole       | 0.150 and -0.159 e.Å <sup>-3</sup>                                                                                                                           |

## 6. Characterization data for products 4-8

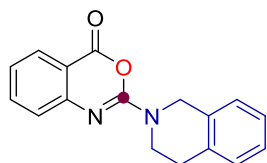

### 2-(3,4-Dihydroisoquinolin-2(1H)-yl)-4H-benzo[d][1,3]oxazin-4-one (4a)

White solid; yield 80%; 111 mg; m.p. 92–93 °C; IR (KBr,  $\text{cm}^{-1}$ )  $\nu$ : 2928, 1748, 1599, 1566, 1472, 1299, 1231, 751;  $^1\text{H}$  NMR (300 MHz,  $\text{CDCl}_3$ )  $\delta$  (ppm) 8.01 (dd,  $J = 7.8$  Hz,  $J = 1.2$  Hz, 1H), 7.64–7.59 (m, 1H), 7.30–7.11 (m, 6H), 4.87 (s, 2H), 3.97 (t,  $J = 5.7$  Hz, 2H), 2.97 (t,  $J = 5.7$  Hz, 2H);  $^{13}\text{C}$  NMR (75 MHz,  $\text{CDCl}_3$ )  $\delta$  (ppm) 159.9, 153.3, 150.8, 136.7, 134.2, 132.4, 128.7, 128.6, 126.8, 126.6, 126.4, 124.2, 123.3, 112.3, 46.1, 41.9, 28.6; HRMS (ESI)  $m/z$  calcd for  $\text{C}_{17}\text{H}_{15}\text{N}_2\text{O}_2$ : 279.1128, found: 279.1134 ( $\text{M}+\text{H}$ ) $^+$ .

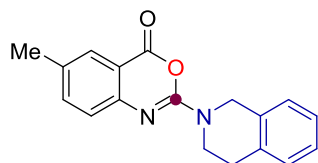

### 2-(3,4-Dihydroisoquinolin-2(1H)-yl)-6-methyl-4H-benzo[d][1,3]oxazin-4-one (4b)

White solid; yield 70%; 102 mg; m.p. 130–131 °C; IR (KBr,  $\text{cm}^{-1}$ )  $\nu$ : 2924, 1700, 1602, 1516, 1498, 1230, 1147, 747;  $^1\text{H}$  NMR (300 MHz,  $\text{CDCl}_3$ )  $\delta$  (ppm) 7.80 (s, 1H), 7.43 (dd,  $J = 8.4$  Hz,  $J = 2.1$  Hz, 1H), 7.22–7.16 (m, 5H), 4.85 (s, 2H), 3.95 (t,  $J = 5.7$  Hz, 2H), 2.95 (t,  $J = 6.0$  Hz, 2H), 2.36 (s, 3H);  $^{13}\text{C}$  NMR (75 MHz,  $\text{CDCl}_3$ )  $\delta$  (ppm) 160.0, 152.9, 148.5, 138.1, 134.2, 133.1, 132.5, 128.5, 128.0, 126.8, 126.5, 126.3, 124.0, 112.0, 46.0, 41.8, 28.6, 20.8; HRMS (ESI)  $m/z$  calcd for  $\text{C}_{18}\text{H}_{17}\text{N}_2\text{O}_2$ : 293.1285, found 293.1288 ( $\text{M}+\text{H}$ ) $^+$ .

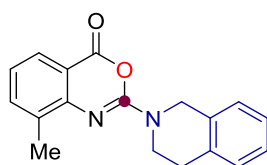

### 2-(3,4-Dihydroisoquinolin-2(1H)-yl)-8-methyl-4H-benzo[d][1,3]oxazin-4-one (4c)

White solid; yield 78%; 114 mg; m.p. 113–114 °C; IR (KBr,  $\text{cm}^{-1}$ )  $\nu$ : 2924, 1758, 1616, 1597, 1456, 1299, 1223, 759;  $^1\text{H}$  NMR (300 MHz,  $\text{CDCl}_3$ )  $\delta$  (ppm) 7.87 (dd,  $J = 7.8$  Hz,  $J = 0.6$  Hz, 1H), 7.48 (dd,  $J = 7.2$  Hz,  $J = 0.6$  Hz, 1H) 7.23–7.18 (m, 4H),

7.03 (t,  $J = 7.8$  Hz, 1H), 4.87 (s, 2H), 3.98 (t,  $J = 5.7$  Hz, 2H), 2.97 (t,  $J = 6.0$  Hz, 2H), 2.43 (s, 3H);  $^{13}\text{C}$  NMR (75 MHz,  $\text{CDCl}_3$ )  $\delta$  (ppm) 160.5, 152.5, 149.3, 137.0, 134.3, 132.7, 132.6, 128.6, 126.8, 126.5, 126.3, 126.1, 122.6, 111.9, 46.0, 41.8, 28.5, 17.2; HRMS (ESI)  $m/z$  calcd for  $\text{C}_{18}\text{H}_{17}\text{N}_2\text{O}_2$ : 293.1285, found 293.1285 ( $\text{M}+\text{H}$ ) $^+$ .

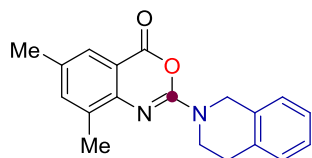

**2-(3,4-Dihydroisoquinolin-2(1H)-yl)-6,8-dimethyl-4H-benzo[d][1,3]oxazin-4-one (4d)**

White solid; yield 75%; 115 mg; m.p. 132–134 °C; IR (KBr,  $\text{cm}^{-1}$ )  $\nu$ : 2922, 1751, 1603, 1455, 1298, 1223, 1150, 925, 749;  $^1\text{H}$  NMR (300 MHz,  $\text{CDCl}_3$ )  $\delta$  (ppm) 7.64 (s, 1H), 7.29 (s, 1H), 7.22–7.15 (m, 4H), 4.83 (s, 2H), 3.94 (t,  $J = 6.0$  Hz, 2H), 2.95 (t,  $J = 6.0$  Hz, 2H), 2.39 (s, 3H), 2.30 (s, 3H);  $^{13}\text{C}$  NMR (75 MHz,  $\text{CDCl}_3$ )  $\delta$  (ppm) 160.6, 152.1, 147.0, 138.5, 134.3, 132.6, 132.4, 132.2, 128.6, 126.7, 126.4, 126.3, 125.4, 111.6, 46.0, 41.8, 28.5, 20.7, 17.0; HRMS (ESI)  $m/z$  calcd for  $\text{C}_{19}\text{H}_{19}\text{N}_2\text{O}_2$ : 307.1441, found 307.1439 ( $\text{M}+\text{H}$ ) $^+$ .

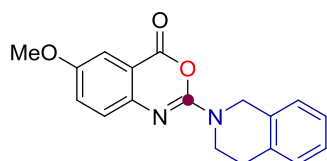

**2-(3,4-Dihydroisoquinolin-2(1H)-yl)-6-methoxy-4H-benzo[d][1,3]oxazin-4-one (4e)**

White solid; yield 73%; 112 mg; m.p. 135–136 °C; IR (KBr,  $\text{cm}^{-1}$ )  $\nu$ : 2973, 1782, 1714, 1509, 1455, 1235, 1045, 744;  $^1\text{H}$  NMR (300 MHz,  $\text{CDCl}_3$ )  $\delta$  (ppm) 7.41 (t,  $J = 1.5$  Hz, 1H), 7.26–7.17 (m, 6H), 4.85 (s, 2H), 3.96 (t,  $J = 5.7$  Hz, 2H), 3.85 (s, 3H), 2.97 (t,  $J = 6.0$  Hz, 2H);  $^{13}\text{C}$  NMR (75 MHz,  $\text{CDCl}_3$ )  $\delta$  (ppm) 160.1, 155.7, 152.4, 145.2, 134.3, 132.5, 128.6, 126.9, 126.8, 126.5, 126.4, 125.7, 112.3, 108.2, 55.7, 46.1, 41.9, 28.6; HRMS (ESI)  $m/z$  calcd for  $\text{C}_{18}\text{H}_{17}\text{N}_2\text{O}_3$ : 309.1234, found 309.1232 ( $\text{M}+\text{H}$ ) $^+$ .

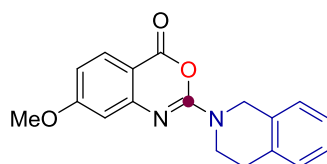

**2-(3,4-Dihydroisoquinolin-2(1H)-yl)-7-methoxy-4H-benzo[d][1,3]oxazin-4-one (4f)**

White solid; yield 79%; 122 mg; m.p. 117–118 °C; IR (KBr,  $\text{cm}^{-1}$ )  $\nu$ : 2929, 1744, 1605, 1564, 1456, 1302, 1211, 1027, 839, 765;  $^1\text{H}$  NMR (300 MHz,  $\text{CDCl}_3$ )  $\delta$  (ppm) 7.92 (dd,  $J = 7.5$  Hz,  $J = 1.8$  Hz, 1H), 7.25–7.18 (m, 4H), 6.74–6.71 (m, 2H), 4.88 (s, 2H), 3.97 (t,  $J = 6.0$  Hz, 2H), 3.89 (s, 3H), 2.98 (t,  $J = 6.0$  Hz, 2H);  $^{13}\text{C}$  NMR (75 MHz,  $\text{CDCl}_3$ )  $\delta$  (ppm) 166.6, 159.4, 153.9, 153.3, 134.2, 132.4, 130.3, 128.5, 126.8, 126.5, 126.3, 113.2, 105.4, 105.2, 55.6, 46.0, 41.8, 28.6; HRMS (ESI)  $m/z$  calcd for  $\text{C}_{18}\text{H}_{17}\text{N}_2\text{O}_3$ : 309.1234, found 309.1232 ( $\text{M}+\text{H}$ ) $^+$ .

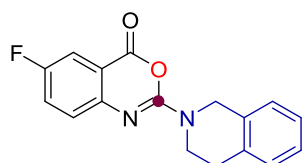

**2-(3,4-Dihydroisoquinolin-2(1H)-yl)-6-fluoro-4H-benzo[d][1,3]oxazin-4-one (4g)**

White solid; yield 78%; 115 mg; m.p. 104–105 °C; IR (KBr,  $\text{cm}^{-1}$ )  $\nu$ : 2923, 1769, 1607, 1491, 1454, 1300, 1229, 733;  $^1\text{H}$  NMR (300 MHz,  $\text{CDCl}_3$ )  $\delta$  (ppm) 7.64–7.61 (m, 1H), 7.36–7.18 (m, 6H), 4.83 (s, 2H), 3.93 (t,  $J = 5.1$  Hz, 2H), 2.95 (t,  $J = 5.4$  Hz, 2H);  $^{13}\text{C}$  NMR (75 MHz,  $\text{CDCl}_3$ )  $\delta$  (ppm) 159.1 (d,  $J_{\text{C-F}} = 3.8$  Hz), 158.1 (d,  $J_{\text{C-F}} = 242.3$  Hz), 152.8, 147.4, 134.1, 132.3, 128.5, 126.9, 126.5, 126.3, 126.1 (d,  $J_{\text{C-F}} = 7.5$  Hz), 125.0 (d,  $J_{\text{C-F}} = 24.0$  Hz), 113.2 (d,  $J_{\text{C-F}} = 23.3$  Hz), 112.7 (d,  $J_{\text{C-F}} = 8.3$  Hz), 46.0, 41.9, 28.5; HRMS (ESI)  $m/z$  calcd for  $\text{C}_{17}\text{H}_{14}\text{FN}_2\text{O}_2$ : 297.1034, found 297.1037 ( $\text{M}+\text{H}$ ) $^+$ .

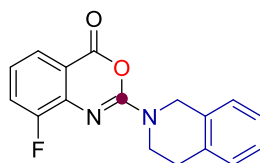

**2-(3,4-Dihydroisoquinolin-2(1H)-yl)-8-fluoro-4H-benzo[d][1,3]oxazin-4-one (4h)**

White solid; yield 80%; 118 mg; m.p. 126–127 °C; IR (KBr,  $\text{cm}^{-1}$ )  $\nu$ : 2928, 1769, 1628, 1613, 1370, 1305, 1061, 931, 755;  $^1\text{H}$  NMR (300 MHz,  $\text{CDCl}_3$ )  $\delta$  (ppm)  $\delta$  7.80 (d,  $J = 7.8$  Hz, 1H), 7.40–7.34 (m, 1H), 7.26–7.21 (m, 4H), 7.09–7.02 (m, 1H), 4.90 (s, 2H), 3.40 (s, 2H), 2.98 (t,  $J = 5.4$  Hz, 2H);  $^{13}\text{C}$  NMR (75 MHz,  $\text{CDCl}_3$ )  $\delta$  (ppm) 158.7 (d,  $J_{\text{C-F}} = 3.8$  Hz), 154.9 (d,  $J_{\text{C-F}} = 249.8$  Hz), 153.3, 140.3 (d,  $J_{\text{C-F}} = 12$  Hz), 134.1, 132.1, 128.5, 126.9, 126.6, 126.3, 124.0 (d,  $J_{\text{C-F}} = 4.5$  Hz), 122.4 (d,  $J_{\text{C-F}} = 7.5$  Hz),

121.0 (d,  $J_{C-F} = 18.8$  Hz), 114.07 (d,  $J_{C-F} = 3.0$  Hz), 46.0, 41.9, 28.5; HRMS (ESI)  $m/z$  calcd for  $C_{17}H_{13}FN_2O_2Na$ : 319.0853, found 319.0856 (M+Na)<sup>+</sup>.

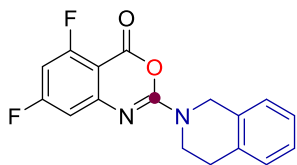

**2-(3,4-Dihydroisoquinolin-2(1H)-yl)-5,7-difluoro-4H-benzo[d][1,3]oxazin-4-one (4i)**

White solid; yield 71%; 112 mg; m.p. 144–145 °C; IR (KBr,  $cm^{-1}$ )  $\nu$ : 3082, 2941, 1771, 1603, 1572, 1449, 1260, 1191, 990, 784;  $^1H$  NMR (300 MHz,  $CDCl_3$ )  $\delta$  (ppm) 7.26–7.20 (m, 4H), 6.75 (d,  $J = 9.9$  Hz, 1H), 6.58–6.51 (m, 1H), 4.87 (s, 2H), 3.97 (s, 2H), 2.97 (t,  $J = 5.7$  Hz, 2H);  $^{13}C$  NMR (75 MHz,  $CDCl_3$ )  $\delta$  (ppm) 167.8 (dd,  $J_{C-F} = 255.0$  Hz,  $J_{C-F} = 15.0$  Hz), 163.7 (dd,  $J_{C-F} = 266.3$  Hz,  $J_{C-F} = 15.8$  Hz), 154.6, 154.3 (d,  $J_{C-F} = 18.7$  Hz), 154.1, 134.0, 132.0, 128.5, 127.0, 126.7, 126.3, 106.0 (dd,  $J_{C-F} = 22.5$  Hz,  $J_{C-F} = 3.8$  Hz), 99.4 (dd,  $J_{C-F} = 26.3$  Hz,  $J_{C-F} = 24.0$  Hz), 98.7 (dd,  $J_{C-F} = 8.3$  Hz,  $J_{C-F} = 2.3$  Hz), 46.2, 42.0, 28.3; HRMS (ESI)  $m/z$  calcd for  $C_{17}H_{12}F_2N_2O_2Na$ : 337.0759, found 337.0753 (M+Na)<sup>+</sup>.

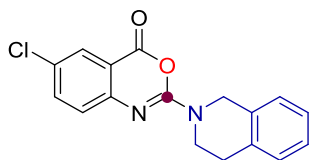

**6-Chloro-2-(3,4-dihydroisoquinolin-2(1H)-yl)-4H-benzo[d][1,3]oxazin-4-one (4j)**

White solid; yield 70%; 109 mg; m.p. 134–135 °C; IR (KBr,  $cm^{-1}$ )  $\nu$ : 3060, 2923, 1770, 1616, 1597, 1477, 1448, 1298, 1227, 913, 747;  $^1H$  NMR (300 MHz,  $CDCl_3$ )  $\delta$  (ppm) 7.98 (d,  $J = 2.4$  Hz, 1H), 7.56 (dd,  $J = 8.7$  Hz,  $J = 2.7$  Hz, 1H), 7.30–7.18 (m, 5H), 4.88 (s, 2H), 3.98 (t,  $J = 6.0$  Hz, 2H), 2.99 (t,  $J = 6.0$  Hz, 2H);  $^{13}C$  NMR (75 MHz,  $CDCl_3$ )  $\delta$  (ppm) 158.8, 153.2, 149.4, 136.9, 134.1, 132.2, 128.5, 128.1, 127.7, 126.9, 126.6, 126.3, 125.8, 113.1, 46.0, 41.9, 28.5; HRMS (ESI)  $m/z$  calcd for  $C_{17}H_{14}ClN_2O_2$ : 313.0738, found 313.0738 (M+H)<sup>+</sup>.

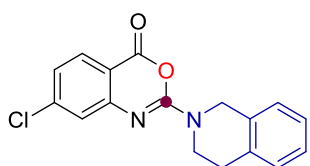



**7-Chloro-2-(3,4-dihydroisoquinolin-2(1H)-yl)-4H-benzo[d][1,3]oxazin-4-one (4k)**

White solid; yield 75%; 117 mg; m.p. 112–113 °C; IR (KBr,  $\text{cm}^{-1}$ )  $\nu$ : 2998, 2892, 1758, 1617, 1590, 1574, 1556, 1456, 1391, 1289, 1224, 922, 768;  $^1\text{H}$  NMR (300 MHz,  $\text{CDCl}_3$ )  $\delta$  (ppm) 7.93 (d,  $J = 8.4$  Hz, 1H), 7.29–7.18 (m, 5H), 7.09 (dd,  $J = 8.4$  Hz,  $J = 1.8$  Hz, 1H), 4.87 (s, 2H), 3.97 (t,  $J = 5.4$  Hz, 2H), 2.98 (t,  $J = 6.0$  Hz, 2H);  $^{13}\text{C}$  NMR (75 MHz,  $\text{CDCl}_3$ )  $\delta$  (ppm) 159.2, 153.8, 151.9, 143.0, 134.1, 132.2, 130.0, 128.6, 127.0, 126.7, 126.4, 123.9, 123.8, 110.6, 46.1, 42.0, 28.6; HRMS (ESI)  $m/z$  calcd for  $\text{C}_{17}\text{H}_{13}\text{ClN}_2\text{O}_2\text{Na}$ : 335.0558, found 335.0556 ( $\text{M}+\text{Na}$ ) $^+$ .

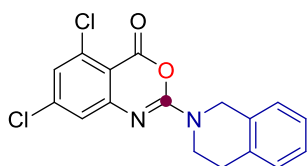

**5,7-Dichloro-2-(3,4-dihydroisoquinolin-2(1H)-yl)-4H-benzo[d][1,3]oxazin-4-one (4l)**

White solid; yield 82%; 142 mg; m.p. 179–180 °C; IR (KBr,  $\text{cm}^{-1}$ )  $\nu$ : 3073, 2933, 1772, 1620, 1574, 1404, 1250, 1207, 1166, 955;  $^1\text{H}$  NMR (300 MHz,  $\text{CDCl}_3$ )  $\delta$  (ppm) 7.25–7.10 (m, 6H), 4.84 (s, 2H), 3.94 (m, 2H), 2.97 (t,  $J = 5.7$  Hz, 2H);  $^{13}\text{C}$  NMR (75 MHz,  $\text{CDCl}_3$ )  $\delta$  (ppm) 155.7, 153.9, 153.8, 141.8, 136.7, 134.0, 132.0, 128.6, 127.0, 126.7, 126.3, 125.5, 123.0, 108.4, 45.6, 41.9, 28.4; HRMS (ESI)  $m/z$  calcd for  $\text{C}_{17}\text{H}_{13}\text{Cl}_2\text{N}_2\text{O}_2$ : 347.0349, found 347.0349 ( $\text{M}+\text{H}$ ) $^+$ .

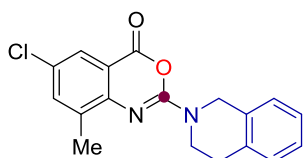

**6-Chloro-2-(3,4-dihydroisoquinolin-2(1H)-yl)-8-methyl-4H-benzo[d][1,3]oxazin-4-one (4m)**

White solid; yield 77%; 126 mg; m.p. 142–143 °C; IR (KBr,  $\text{cm}^{-1}$ )  $\nu$ : 2905, 1757, 1615, 1445, 1298, 1250, 782, 751;  $^1\text{H}$  NMR (300 MHz,  $\text{CDCl}_3$ )  $\delta$  (ppm) 7.77 (d,  $J = 2.1$  Hz, 1H), 7.38 (d,  $J = 1.8$  Hz, 1H), 7.23–7.17 (m, 4H), 4.84 (s, 2H), 3.95 (t,  $J = 5.4$  Hz, 2H), 2.96 (t,  $J = 5.7$  Hz, 2H), 2.38 (s, 3H);  $^{13}\text{C}$  NMR (75 MHz,  $\text{CDCl}_3$ )  $\delta$  (ppm) 159.4, 152.5, 148.0, 136.8, 135.0, 134.2, 132.3, 128.6, 127.3, 126.9, 126.5, 126.3, 125.0, 112.6, 46.0, 41.9, 28.5, 17.0; HRMS (ESI)  $m/z$  calcd for  $\text{C}_{18}\text{H}_{16}\text{ClN}_2\text{O}_2$ : 327.0895, found 327.0901 ( $\text{M}+\text{H}$ ) $^+$ .

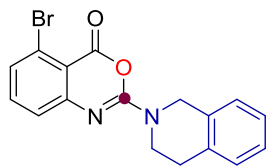

**5-Bromo-2-(3,4-dihydroisoquinolin-2(1H)-yl)-4H-benzo[d][1,3]oxazin-4-one (4n)**

White solid; yield 81%; 145 mg; m.p. 114–115 °C; IR (KBr,  $\text{cm}^{-1}$ )  $\nu$ : 2932, 1768, 1621, 1591, 1542, 1431, 1287, 799, 732;  $^1\text{H}$  NMR (300 MHz,  $\text{CDCl}_3$ )  $\delta$  (ppm) 7.38–7.34 (m, 2H), 7.24–7.16 (m, 5H), 4.85 (s, 2H), 3.95 (t,  $J = 5.7$  Hz, 2H), 2.96 (t,  $J = 6.0$  Hz, 2H);  $^{13}\text{C}$  NMR (75 MHz,  $\text{CDCl}_3$ )  $\delta$  (ppm) 156.7, 153.3, 153.1, 136.1, 134.1, 132.2, 129.3, 128.6, 126.9, 126.6, 126.3, 124.0, 123.4, 111.2, 45.9, 41.8, 28.5; HRMS (ESI)  $m/z$  calcd for  $\text{C}_{17}\text{H}_{14}\text{BrN}_2\text{O}_2$ : 357.0233, found 357.0234 ( $\text{M}+\text{H}$ ) $^+$ .

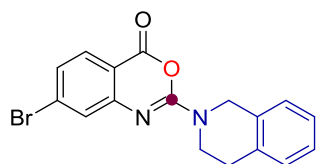

**7-Bromo-2-(3,4-dihydroisoquinolin-2(1H)-yl)-4H-benzo[d][1,3]oxazin-4-one (4o)**

White solid; yield 79%; 141 mg; m.p. 123–124 °C; IR (KBr,  $\text{cm}^{-1}$ )  $\nu$ : 2926, 1767, 1705, 1614, 1592, 1453, 1390, 1230, 912, 745;  $^1\text{H}$  NMR (300 MHz,  $\text{CDCl}_3$ )  $\delta$  (ppm) 7.83 (d,  $J = 8.4$  Hz, 1H), 7.48 (d,  $J = 1.8$  Hz, 1H), 7.25–7.18 (m, 5H), 4.86 (s, 2H), 3.96 (t,  $J = 5.4$  Hz, 2H), 2.97 (t,  $J = 6.0$  Hz, 2H);  $^{13}\text{C}$  NMR (75 MHz,  $\text{CDCl}_3$ )  $\delta$  (ppm) 159.3, 153.8, 151.9, 134.1, 132.2, 131.8, 129.9, 128.6, 127.0, 127.0, 126.7, 126.6, 126.3, 111.0, 46.1, 42.0, 28.5; HRMS (ESI)  $m/z$  calcd for  $\text{C}_{17}\text{H}_{14}\text{BrN}_2\text{O}_2$ : 357.0233, found 357.0233. ( $\text{M}+\text{H}$ ) $^+$ .

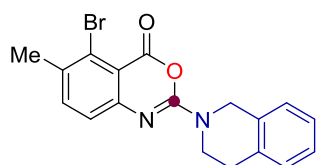

**5-Bromo-2-(3,4-dihydroisoquinolin-2(1H)-yl)-6-methyl-4H-benzo[d][1,3]oxazin-4-one (4p)**

White solid; yield 80%; 148 mg; m.p. 112–113 °C; IR (KBr,  $\text{cm}^{-1}$ )  $\nu$ : 2925, 1713, 1622, 1593, 1468, 1224, 1146, 730;  $^1\text{H}$  NMR (300 MHz,  $\text{CDCl}_3$ )  $\delta$  (ppm) 7.43 (d,  $J = 8.4$  Hz, 1H), 7.23–7.15 (m, 5H), 4.84 (s, 2H), 3.94 (t,  $J = 5.7$  Hz, 2H), 2.96 (t,  $J = 5.7$

Hz, 2H), 2.43 (s, 3H);  $^{13}\text{C}$  NMR (75 MHz,  $\text{CDCl}_3$ )  $\delta$  (ppm) 156.8, 152.9, 151.2, 137.8, 134.8, 134.1, 132.2, 128.6, 126.9, 126.6, 126.3, 124.7, 123.3, 111.3, 45.9, 41.7, 28.6, 23.7; HRMS (ESI)  $m/z$  calcd for  $\text{C}_{18}\text{H}_{16}\text{BrN}_2\text{O}_2$ : 371.0390, found 371.0389 ( $\text{M}+\text{H}$ ) $^+$ .

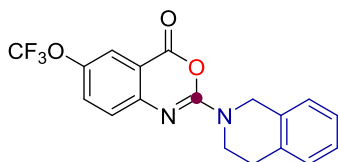

**2-(3,4-Dihydroisoquinolin-2(1H)-yl)-6-(trifluoromethoxy)-4H-benzo[d][1,3]oxazin-4-one (4q)**

White solid; yield 75%; 136 mg; m.p. 122–123 °C; IR (KBr,  $\text{cm}^{-1}$ )  $\nu$ : 2932, 1771, 1602, 1493, 1454, 1261, 930, 750;  $^1\text{H}$  NMR (300 MHz,  $\text{CDCl}_3$ )  $\delta$  (ppm) 7.83 (s, 1H), 7.44 (d,  $J = 9.0$  Hz, 1H), 7.37-7.19 (m, 5H), 4.85 (s, 2H), 3.95 (m, 2H), 2.96 (t,  $J = 5.1$  Hz, 2H);  $^{13}\text{C}$  NMR (75 MHz,  $\text{CDCl}_3$ )  $\delta$  (ppm) 158.9, 153.4, 149.6, 144.1 (d,  $J_{\text{C-F}} = 2.3$  Hz), 134.1, 132.1, 130.2, 128.6, 127.0, 126.6, 126.3, 126.0, 120.4 (d,  $J_{\text{C-F}} = 255.7$  Hz), 120.2, 112.6, 46.1, 42.0, 28.5; HRMS (ESI)  $m/z$  calcd for  $\text{C}_{18}\text{H}_{14}\text{F}_3\text{N}_2\text{O}_3$ : 363.0951, found 363.0950 ( $\text{M}+\text{H}$ ) $^+$ .

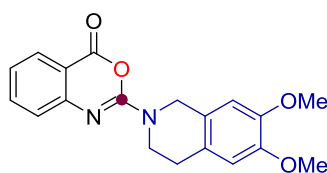

**2-(6,7-Dimethoxy-3,4-dihydroisoquinolin-2(1H)-yl)-4H-benzo[d][1,3]oxazin-4-one (4s)**

White solid; yield 62%; 105 mg; m.p. 149–150 °C; IR (KBr,  $\text{cm}^{-1}$ )  $\nu$ : 2986, 2865, 1743, 1622, 1591, 1451, 1273, 1120, 772;  $^1\text{H}$  NMR (300 MHz,  $\text{CDCl}_3$ )  $\delta$  (ppm) 8.02 (d,  $J = 6.9$  Hz, 1H), 7.65-7.60 (m, 1H), 7.31-7.27 (m, 1H), 7.15 (t,  $J = 7.5$  Hz, 1H), 6.67 (d,  $J = 6.3$  Hz, 2H), 4.82 (s, 2H), 3.97 (t,  $J = 5.4$  Hz, 2H), 3.88 (s, 3H), 3.87 (s, 3H), 2.90 (t,  $J = 5.7$  Hz, 2H);  $^{13}\text{C}$  NMR (75 MHz,  $\text{CDCl}_3$ )  $\delta$  (ppm) 159.9, 153.3, 150.7, 147.9, 147.8, 136.7, 128.7, 126.0, 124.1, 123.3, 112.3, 111.3, 109.0, 55.9 (2C), 45.8, 42.0, 28.1; HRMS (ESI)  $m/z$  calcd for  $\text{C}_{19}\text{H}_{19}\text{N}_2\text{O}_4$ : 339.1339, found 339.1344 ( $\text{M}+\text{H}$ ) $^+$ .

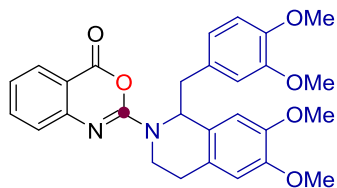

**2-(1-(3,4-Dimethoxybenzyl)-6,7-dimethoxy-3,4-dihydroisoquinolin-2(1H)-yl)-4H-benzo[d][1,3]oxazin-4-one (4t)**

White solid; yield 68%; 166 mg; m.p. 155–156 °C; IR (KBr,  $\text{cm}^{-1}$ )  $\nu$ : 2959, 2934, 2833, 1747, 1602, 1438, 1270, 1140, 850, 765;  $^1\text{H}$  NMR (300 MHz,  $\text{CDCl}_3$ )  $\delta$  7.99 (s, 1H), 7.62 (t,  $J = 6.9$  Hz, 1H), 7.30–7.27 (m, 1H), 7.16–7.11 (m, 1H), 6.73–6.64 (m, 4H), 6.38 (s, 1H), 5.70–5.50 (m, 1H), 4.43–4.11 (m, 1H), 3.87–3.72 (m, 12H), 3.62–3.59 (m, 1H), 3.20–3.03 (m, 3H), 2.93 (s, 1H);  $^{13}\text{C}$  NMR (75 MHz,  $\text{CDCl}_3$ )  $\delta$  (ppm) 159.6, 153.1, 150.8, 148.6, 147.8, 147.7, 147.0, 136.5, 130.0, 128.5, 127.4, 125.8, 124.0, 123.0, 121.9, 112.7, 112.1, 111.1, 110.9, 110.3, 56.6, 55.8(2C), 55.7, 42.9, 41.6, 39.3, 27.5; HRMS (ESI)  $m/z$  calcd for  $\text{C}_{28}\text{H}_{29}\text{N}_2\text{O}_6$ : 489.2020, found 489.2024 ( $\text{M}+\text{H}$ ) $^+$ .

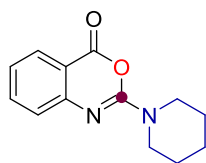

**2-(Piperidin-1-yl)-4H-benzo[d][1,3]oxazin-4-one (5a)** <sup>[1]</sup>

White solid; yield 82%; 94 mg; m.p. 101–102 °C; IR (KBr,  $\text{cm}^{-1}$ )  $\nu$ : 2942, 1748, 1590, 1464, 1282, 1004, 775;  $^1\text{H}$  NMR (300 MHz,  $\text{CDCl}_3$ )  $\delta$  (ppm) 7.99 (dd,  $J = 7.8$  Hz,  $J = 1.2$  Hz, 1H), 7.62–7.56 (m, 1H), 7.22 (d,  $J = 8.1$  Hz, 1H), 7.13–7.08 (m, 1H), 3.72 (d,  $J = 5.4$  Hz, 4H), 1.66 (d,  $J = 6.3$  Hz, 6H);  $^{13}\text{C}$  NMR (75 MHz,  $\text{CDCl}_3$ )  $\delta$  (ppm) 160.2, 153.3, 151.2, 136.6, 128.6, 124.1, 122.9, 112.1, 45.2, 25.5, 24.3; HRMS (ESI)  $m/z$  calcd for  $\text{C}_{13}\text{H}_{15}\text{N}_2\text{O}_2$ : 231.1128, found 231.1129 ( $\text{M}+\text{H}$ ) $^+$ .

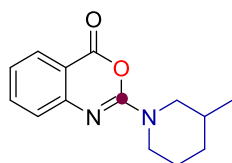

**2-(3-Methylpiperidin-1-yl)-4H-benzo[d][1,3]oxazin-4-one (5b)**

White solid; yield 83%; 101 mg; m.p. 103–104 °C; IR (KBr,  $\text{cm}^{-1}$ )  $\nu$ : 2925, 2851, 1747, 1593, 1487, 1273, 1241, 1003, 776;  $^1\text{H}$  NMR (300 MHz,  $\text{CDCl}_3$ )  $\delta$  (ppm) 7.99–7.97 (m, 1H), 7.61–7.56 (m, 1H), 7.22 (d,  $J = 8.1$  Hz, 1H), 7.12–7.07 (m, 1H),

4.43-4.34 (m, 2H), 2.96-2.87 (m, 1H), 2.64-2.56 (m, 1H), 1.87-1.54 (m, 4H), 1.22-1.11 (m, 1H), 0.96 (d,  $J = 6.3$  Hz, 3H);  $^{13}\text{C}$  NMR (75 MHz,  $\text{CDCl}_3$ )  $\delta$  (ppm) 160.1, 153.2, 151.1, 136.5, 128.5, 124.0, 122.8, 112.0, 51.3, 44.6, 32.7, 30.9, 24.9, 18.8; HRMS (ESI)  $m/z$  calcd for  $\text{C}_{14}\text{H}_{17}\text{N}_2\text{O}_2$ : 245.1285, found 245.1286 ( $\text{M}+\text{H}$ ) $^+$ .

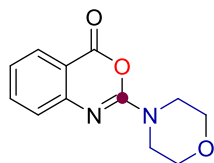

**2-Morpholino-4H-benzo[d][1,3]oxazin-4-one (5c)**<sup>[2]</sup>

White solid; yield 87%; 101 mg; m.p. 116–117 °C; IR (KBr,  $\text{cm}^{-1}$ )  $\nu$ : 2968, 1746, 1600, 1473, 1278, 1114, 993, 774;  $^1\text{H}$  NMR (300 MHz,  $\text{CDCl}_3$ )  $\delta$  (ppm) 8.01 (dd,  $J = 8.1$  Hz,  $J = 1.5$  Hz, 1H), 7.65-7.60 (m, 1H), 7.24 (d,  $J = 8.1$  Hz, 1H), 7.19-7.13 (m, 1H), 3.79-3.72 (m, 8H);  $^{13}\text{C}$  NMR (75 MHz,  $\text{CDCl}_3$ )  $\delta$  (ppm) 159.5, 153.2, 150.4, 136.7, 128.7, 124.2, 123.6, 112.4, 66.3, 44.3; HRMS (ESI)  $m/z$  calcd for  $\text{C}_{12}\text{H}_{13}\text{N}_2\text{O}_3$ : 233.0921, found 233.0922 ( $\text{M}+\text{H}$ ) $^+$ .

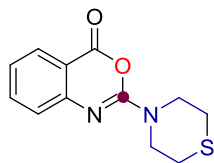

**2-Thiomorpholino-4H-benzo[d][1,3]oxazin-4-one (5d)**

White solid; yield 75%; 93 mg; m.p. 119–120 °C; IR (KBr,  $\text{cm}^{-1}$ )  $\nu$ : 2912, 2852, 1773, 1591, 1474, 1308, 1225, 1006, 757;  $^1\text{H}$  NMR (300 MHz,  $\text{CDCl}_3$ )  $\delta$  (ppm) 8.01 (d,  $J = 7.2$  Hz, 1H), 7.63 (t,  $J = 6.9$  Hz, 1H), 7.24-7.14 (m, 2H), 4.05 (t,  $J = 4.5$  Hz, 4H), 2.72 (s, 4H);  $^{13}\text{C}$  NMR (75 MHz,  $\text{CDCl}_3$ )  $\delta$  (ppm) 159.7, 152.8, 150.5, 136.8, 128.7, 124.3, 123.6, 112.3, 46.8, 27.1; HRMS (ESI)  $m/z$  calcd for  $\text{C}_{12}\text{H}_{13}\text{N}_2\text{O}_2\text{S}$ : 249.0692, found 249.0696 ( $\text{M}+\text{H}$ ) $^+$ .

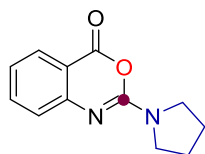

**2-(Pyrrolidin-1-yl)-4H-benzo[d][1,3]oxazin-4-one (5f)**<sup>[3]</sup>

White solid; yield 42%; 45 mg; m.p. 108–109 °C; IR (KBr,  $\text{cm}^{-1}$ )  $\nu$ : 2971, 2876, 2760, 1594, 1328, 1304, 1018, 769;  $^1\text{H}$  NMR (300 MHz,  $\text{CDCl}_3$ )  $\delta$  (ppm) 8.00 (dd,  $J = 7.8$  Hz,  $J = 1.2$  Hz, 1H), 7.63–7.57 (m, 1H), 7.28–7.25 (m, 1H), 7.11 (t,  $J = 7.8$  Hz, 1H), 3.63 (t,  $J = 6.6$  Hz, 4H), 2.03–1.98 (m, 4H);  $^{13}\text{C}$  NMR (75 MHz,  $\text{CDCl}_3$ )  $\delta$  (ppm) 160.1, 152.6, 151.1, 136.6, 128.7, 123.9, 122.8, 112.1, 46.8, 25.2; HRMS (ESI)  $m/z$  calcd for  $\text{C}_{12}\text{H}_{13}\text{N}_2\text{O}_2$ : 217.0972, found 217.0973 ( $\text{M}+\text{H}$ ) $^+$ .

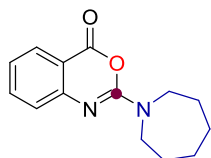

**2-(Azepan-1-yl)-4H-benzo[*d*][1,3]oxazin-4-one (5g)**

White solid; yield 81%; 99 mg; m.p. 95–96 °C; IR (KBr,  $\text{cm}^{-1}$ )  $\nu$ : 2926, 2850, 1743, 1592, 1435, 1311, 774;  $^1\text{H}$  NMR (300 MHz,  $\text{CDCl}_3$ )  $\delta$  (ppm) 8.00 (dd,  $J = 7.8$  Hz,  $J = 1.2$  Hz, 1H), 7.60–7.57 (m, 1H), 7.26 (d,  $J = 6.3$  Hz, 1H), 7.10 (t,  $J = 7.5$  Hz, 1H), 3.70 (s, 4H), 1.82 (s, 4H), 1.62–1.59 (m, 4H);  $^{13}\text{C}$  NMR (75 MHz,  $\text{CDCl}_3$ )  $\delta$  (ppm) 160.2, 153.8, 151.3, 136.5, 128.5, 124.0, 122.6, 112.0, 47.7, 46.7, 28.3, 27.4, 26.9; HRMS (ESI)  $m/z$  calcd for  $\text{C}_{14}\text{H}_{17}\text{N}_2\text{O}_2$ : 245.1285, found 245.1285 ( $\text{M}+\text{H}$ ) $^+$ .

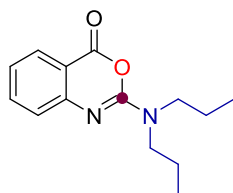

**2-(Dipropylamino)-4H-benzo[*d*][1,3]oxazin-4-one (5h)**

White solid; yield 74%; 91 mg; m.p. 44–45 °C; IR (KBr,  $\text{cm}^{-1}$ )  $\nu$ : 3291, 2938, 1745, 1636, 1604, 1475, 1232, 759;  $^1\text{H}$  NMR (300 MHz,  $\text{CDCl}_3$ )  $\delta$  (ppm) 7.99 (dd,  $J = 7.8$  Hz,  $J = 1.5$  Hz, 1H), 7.59–7.56 (m, 1H), 7.24 (d,  $J = 8.1$  Hz, 1H), 7.12–7.09 (m, 1H), 3.46 (t,  $J = 7.5$ , 4H), 1.73–1.65 (m, 4H), 0.96 (t,  $J = 7.5$  Hz, 6H);  $^{13}\text{C}$  NMR (75 MHz,  $\text{CDCl}_3$ )  $\delta$  (ppm) 160.2, 153.9, 151.3, 136.5, 128.6, 124.1, 122.7, 112.1, 49.5, 21.2, 11.2; HRMS (ESI)  $m/z$  calcd for  $\text{C}_{14}\text{H}_{19}\text{N}_2\text{O}_2$ : 247.1441, found 247.1438 ( $\text{M}+\text{H}$ ) $^+$ .

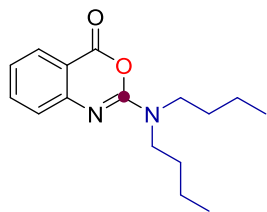

**2-(Dibutylamino)-4H-benzo[d][1,3]oxazin-4-one (5i)** <sup>[1]</sup>

White solid; yield 77%; 106 mg; m.p. 48–49 °C; IR (KBr,  $\text{cm}^{-1}$ )  $\nu$ : 2958, 2932, 1763, 1597, 1473, 1291, 1000, 760, 686;  $^1\text{H}$  NMR (300 MHz,  $\text{CDCl}_3$ )  $\delta$  (ppm) 7.99 (dd,  $J = 8.1$  Hz,  $J = 1.5$  Hz, 1H), 7.61–7.55 (m, 1H), 7.22 (d,  $J = 8.4$  Hz, 1H), 7.11–7.06 (m, 1H), 3.48 (t,  $J = 7.2$  Hz, 4H), 1.66–1.59 (m, 4H), 1.41–1.34 (m, 4H), 0.97 (t,  $J = 7.5$  Hz, 6H);  $^{13}\text{C}$  NMR (75 MHz,  $\text{CDCl}_3$ )  $\delta$  (ppm) 160.3, 153.8, 151.3, 136.5, 128.6, 124.1, 122.6, 112.1, 47.5, 30.1, 20.0, 13.8; HRMS (ESI)  $m/z$  calcd for  $\text{C}_{16}\text{H}_{23}\text{N}_2\text{O}_2$ : 275.1754, found 275.1756 ( $\text{M}+\text{H}$ )<sup>+</sup>

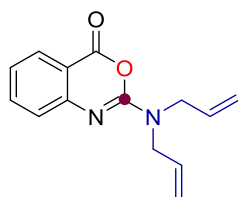

**2-(Diallylamino)-4H-benzo[d][1,3]oxazin-4-one (5j)**

Yellow oil; yield 72%; 87 mg; IR (KBr,  $\text{cm}^{-1}$ )  $\nu$ : 3080.8, 2983.2, 2923.8, 1762.3, 1586.9, 1473.4, 1239.7, 998.7, 764.2, 688.8;  $^1\text{H}$  NMR (300 MHz,  $\text{CDCl}_3$ )  $\delta$  (ppm) 7.99 (d,  $J = 7.8$ , 1H), 7.62–7.57 (m, 1H), 7.24 (d,  $J = 8.1$  Hz, 1H), 7.12 (t,  $J = 7.2$  Hz, 1H), 5.93–5.80 (m, 2H), 5.26–5.21 (m, 4H), 4.14 (d,  $J = 3.6$  Hz, 4H);  $^{13}\text{C}$  NMR (75 MHz,  $\text{CDCl}_3$ )  $\delta$  (ppm) 159.8, 153.6, 150.8, 136.5, 132.3, 128.5, 124.2, 123.1, 117.8, 112.2, 48.9; HRMS (ESI)  $m/z$  calcd for  $\text{C}_{14}\text{H}_{15}\text{N}_2\text{O}_2$ : 243.1128, found 243.1129 ( $\text{M}+\text{H}$ )<sup>+</sup>.

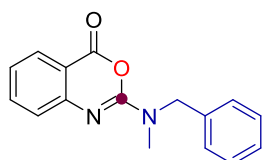

**2-(Benzylamino)-4H-benzo[d][1,3]oxazin-4-one (5k)** <sup>[4]</sup>

White solid; yield 71%; 94 mg; m.p. 118–119 °C; IR (KBr,  $\text{cm}^{-1}$ )  $\nu$ : 3057, 2922, 1767, 1624, 1473, 1308, 1002, 731;  $^1\text{H}$  NMR (300 MHz,  $\text{CDCl}_3$ )  $\delta$  (ppm) 8.01 (d,  $J = 7.2$  Hz, 1H), 7.60 (t,  $J = 7.2$  Hz, 1H), 7.32–7.24 (m, 6H), 7.13 (t,  $J = 7.5$  Hz, 1H), 4.76 (s,

2H), 3.10 (s, 3H);  $^{13}\text{C}$  NMR (75 MHz,  $\text{CDCl}_3$ )  $\delta$  (ppm) 159.9, 154.3, 150.9, 136.6, 136.3, 128.7, 128.6, 127.7, 124.2, 123.1, 112.2, 52.5, 34.5; HRMS (ESI)  $m/z$  calcd for  $\text{C}_{16}\text{H}_{15}\text{N}_2\text{O}_2$ : 267.1128, found 267.1132 ( $\text{M}+\text{H}$ ) $^+$ .

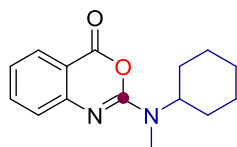

**2-(Cyclohexyl(methyl)amino)-4H-benzo[d][1,3]oxazin-4-one (5l)**<sup>[5]</sup>

White solid; yield 69%; 89 mg; m.p. 127–128 °C; IR (KBr,  $\text{cm}^{-1}$ )  $\nu$ : 2946, 2922, 2854, 1770, 1592, 1402, 1304, 1008, 759, 685;  $^1\text{H}$  NMR (300 MHz,  $\text{CDCl}_3$ )  $\delta$  (ppm) 7.99 (d,  $J = 7.8$  Hz, 1H), 7.61–7.56 (m, 1H), 7.27–7.23 (m, 1H), 7.10 (t,  $J = 7.5$  Hz, 1H), 4.34 (s, 1H), 3.02 (s, 3H), 1.87–1.69 (m, 5H), 1.56–1.38 (m, 4H), 1.14–1.10 (m, 1H);  $^{13}\text{C}$  NMR (75 MHz,  $\text{CDCl}_3$ )  $\delta$  (ppm) 160.3, 153.9, 151.3, 136.5, 128.6, 124.1, 122.7, 112.1, 54.9, 30.0, 28.9, 25.5, 25.4; HRMS (ESI)  $m/z$  calcd for  $\text{C}_{15}\text{H}_{19}\text{N}_2\text{O}_2$ : 259.1441, found 259.1444 ( $\text{M}+\text{H}$ ) $^+$ .

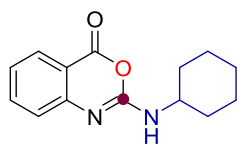

**2-(Cyclohexylamino)-4H-benzo[d][1,3]oxazin-4-one (5m)**<sup>[6]</sup>

White solid; yield 75%; 92 mg; m.p. 207–208 °C; IR (KBr,  $\text{cm}^{-1}$ )  $\nu$ : 3291, 2920, 2853, 1745, 1636, 1604, 1475, 1232, 759;  $^1\text{H}$  NMR (300 MHz,  $\text{CDCl}_3$ )  $\delta$  (ppm) 8.02 (d,  $J = 7.8$  Hz, 1H), 7.65–7.59 (m, 1H), 7.25 (d,  $J = 7.8$  Hz, 1H), 7.16 (t,  $J = 7.5$  Hz, 1H), 4.85 (s, 1H), 3.87–3.77 (m, 1H), 2.08–2.05 (m, 2H), 1.78–1.63 (m, 3H), 1.50–1.38 (m, 2H), 1.32–1.17 (m, 3H);  $^{13}\text{C}$  NMR (75 MHz,  $\text{CDCl}_3$ )  $\delta$  (ppm) 160.0, 153.0, 150.5, 136.7, 128.7, 124.1, 123.4, 113.1, 50.2, 32.9, 25.4, 24.6; HRMS (ESI)  $m/z$  calcd for  $\text{C}_{14}\text{H}_{17}\text{N}_2\text{O}_2$ : 245.1285, found 245.1285 ( $\text{M}+\text{H}$ ) $^+$ .

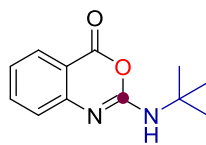

**2-(tert-butylamino)-4H-benzo[d][1,3]oxazin-4-one (5n)**<sup>[6]</sup>



Yellow solid; yield 53%; 58 mg; m.p. 129–130 °C; IR (KBr,  $\text{cm}^{-1}$ )  $\nu$ : 3299, 2972, 1742, 1631, 1606, 1475, 1278, 1071, 762;  $^1\text{H}$  NMR (300 MHz,  $\text{CDCl}_3$ )  $\delta$  (ppm) 8.01 (dd,  $J = 7.8, 1.2$  Hz, 1H), 7.63–7.58 (m, 1H), 7.26 (d,  $J = 8.4$  Hz, 1H), 7.17–7.12 (m, 1H), 5.06 (s, 1H), 1.49 (s, 9H);  $^{13}\text{C}$  NMR (75 MHz,  $\text{CDCl}_3$ )  $\delta$  (ppm) 160.1, 152.2, 150.3, 136.4, 128.5, 124.4, 123.3, 113.2, 51.9, 28.7; HRMS (ESI)  $m/z$  calcd for  $\text{C}_{12}\text{H}_{15}\text{N}_2\text{O}_2$ : 219.1128, found 219.1129 ( $\text{M}+\text{H}$ ) $^+$ .

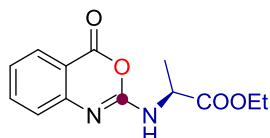

**Ethyl (4-oxo-4H-benzo[*d*][1,3]oxazin-2-yl)alaninate (5o)** <sup>[1]</sup>

White solid; yield 73%; 96 mg; m.p. 132–133 °C; IR (KBr,  $\text{cm}^{-1}$ )  $\nu$ : 3342, 2979, 2938, 1769, 1630, 1472, 1219, 767;  $^1\text{H}$  NMR (300 MHz,  $\text{CDCl}_3$ )  $\delta$  (ppm) 8.03 (d,  $J = 6.9$  Hz 1H), 7.66–7.61 (m, 1H), 7.28–7.17 (m, 2H), 5.57 (s, 1H), 4.63 (d,  $J = 6.6$  Hz, 1H), 4.26 (q,  $J = 6.9$  Hz, 2H), 1.55 (d,  $J = 7.2$  Hz, 3H), 1.31 (t,  $J = 7.2$  Hz, 3H);  $^{13}\text{C}$  NMR (75 MHz,  $\text{CDCl}_3$ )  $\delta$  (ppm) 172.5, 159.5, 152.7, 149.8, 136.7, 128.7, 124.4, 124.0, 113.4, 61.7, 50.0, 18.3, 14.1; HRMS (ESI)  $m/z$  calcd for  $\text{C}_{13}\text{H}_{15}\text{N}_2\text{O}_4$ : 263.1026, found 263.1030 ( $\text{M}+\text{H}$ ) $^+$ .

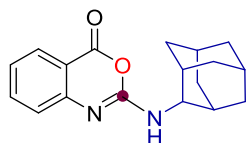

**2-(((1R,3S,5r,7r)-Adamantan-2-yl)amino)-4H-benzo[*d*][1,3]oxazin-4-one (5p)** <sup>[6]</sup>

Yellow solid; yield 65%; 96 mg; m.p. 198–199 °C; IR (KBr,  $\text{cm}^{-1}$ )  $\nu$ : 3277, 2902, 2848, 1736, 1629, 1477, 1280, 1058, 763;  $^1\text{H}$  NMR (300 MHz,  $\text{CDCl}_3$ )  $\delta$  (ppm) 8.01 (d,  $J = 7.8$  Hz, 1H), 7.61 (t,  $J = 7.2$  Hz, 1H), 7.26–7.24 (m, 1H), 7.14 (t,  $J = 7.5$  Hz, 1H), 4.81 (s, 1H), 2.12 (m, 9H), 1.72 (s, 6H);  $^{13}\text{C}$  NMR (75 MHz,  $\text{CDCl}_3$ )  $\delta$  (ppm) 160.0, 152.0, 150.2, 136.5, 128.6, 124.3, 123.4, 113.3, 52.5, 41.6, 36.2, 29.5; HRMS (ESI)  $m/z$  calcd for  $\text{C}_{18}\text{H}_{21}\text{N}_2\text{O}_2$ : 297.1598, found 297.1606 ( $\text{M}+\text{H}$ ) $^+$ .

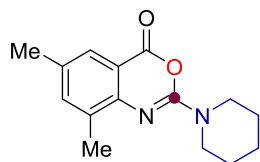

**6,8-Dimethyl-2-(piperidin-1-yl)-4H-benzo[d][1,3]oxazin-4-one (5q)**

Yellow solid; yield 77%; 99 mg; m.p. 92–93 °C; IR (KBr,  $\text{cm}^{-1}$ )  $\nu$ : 2944, 2864, 2360, 1746, 1602, 1490, 1299, 786;  $^1\text{H}$  NMR (300 MHz,  $\text{CDCl}_3$ )  $\delta$  (ppm) 7.62 (s, 1H), 7.26 (s, 1H), 3.69 (d,  $J = 5.1$  Hz, 4H), 2.34 (s, 3H), 2.34 (s, 3H), 1.66 (s, 6H);  $^{13}\text{C}$  NMR (75 MHz,  $\text{CDCl}_3$ )  $\delta$  (ppm) 160.8, 152.2, 147.3, 138.3, 132.2, 131.8, 125.3, 111.3, 45.0, 25.4, 24.2, 20.7, 16.9; HRMS (ESI)  $m/z$  calcd for  $\text{C}_{15}\text{H}_{19}\text{N}_2\text{O}_2$ : 259.1441, found 259.1445 ( $\text{M}+\text{H}$ ) $^+$ .

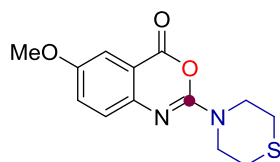

**6-Methoxy-2-thiomorpholino-4H-benzo[d][1,3]oxazin-4-one (5r)**

White solid; yield 81%; 113 mg; m.p. 158–159 °C; IR (KBr,  $\text{cm}^{-1}$ )  $\nu$ : 2912, 2837, 2360, 1762, 1495, 1308, 1032, 822, 786;  $^1\text{H}$  NMR (300 MHz,  $\text{CDCl}_3$ )  $\delta$  (ppm) 7.40 (d,  $J = 2.4$  Hz, 1H), 7.28–7.19 (m, 2H), 4.04–4.01 (m, 4H), 3.85 (s, 3H), 2.72–2.69 (m, 4H);  $^{13}\text{C}$  NMR (75 MHz,  $\text{CDCl}_3$ )  $\delta$  (ppm) 159.8, 155.9, 151.9, 144.8, 126.9, 125.7, 112.4, 108.2, 55.8, 46.9, 27.0; HRMS (ESI)  $m/z$  calcd for  $\text{C}_{13}\text{H}_{15}\text{N}_2\text{O}_3\text{S}$ : 279.0798, found 279.0806 ( $\text{M}+\text{H}$ ) $^+$ .

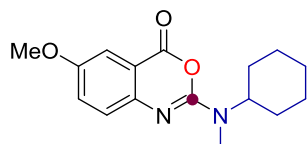

**2-(Cyclohexyl(methyl)amino)-6-methoxy-4H-benzo[d][1,3]oxazin-4-one (5s)**

White solid; yield 83%; 120 mg; m.p. 126–127 °C; IR (KBr,  $\text{cm}^{-1}$ )  $\nu$ : 2927, 2853, 1752, 1604, 1297, 1038, 836, 776;  $^1\text{H}$  NMR (300 MHz,  $\text{CDCl}_3$ )  $\delta$  (ppm) 7.38 (s, 1H), 7.27–7.18 (m, 2H), 4.30 (s, 1H), 3.84 (s, 3H), 3.00 (s, 3H), 1.86–1.68 (m, 5H), 1.56–1.38 (m, 4H), 1.18–1.11 (m, 1H).  $^{13}\text{C}$  NMR (75 MHz,  $\text{CDCl}_3$ )  $\delta$  (ppm) 160.4, 155.3, 153.0, 145.8, 126.8, 125.6, 112.0, 108.0, 55.7, 54.9, 30.0, 28.8, 25.6, 25.4; HRMS (ESI)  $m/z$  calcd for  $\text{C}_{16}\text{H}_{21}\text{N}_2\text{O}_3$ : 289.1547, found 289.1553 ( $\text{M}+\text{H}$ ) $^+$ .

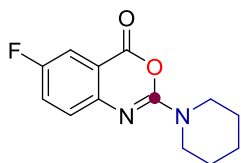

**6-Fluoro-2-(piperidin-1-yl)-4H-benzo[d][1,3]oxazin-4-one (5t)**

Brown solid; yield 80%; 99 mg; m.p. 91–92 °C; IR (KBr,  $\text{cm}^{-1}$ )  $\nu$ : 2947, 2860, 1767, 1607, 1489, 1208, 935, 830;  $^1\text{H}$  NMR (300 MHz,  $\text{CDCl}_3$ )  $\delta$  (ppm) 7.61 (d,  $J = 7.8$  Hz, 1H), 7.34–7.18 (m, 2H), 3.69 (s, 4H), 1.67 (s, 6H);  $^{13}\text{C}$  NMR (75 MHz,  $\text{CDCl}_3$ )  $\delta$  (ppm) 159.6, 159.4 (d,  $J_{\text{C-F}} = 3.75$  Hz) 154.6 (d,  $J_{\text{C-F}} = 267.0$  Hz), 147.7, 126.0 (d,  $J_{\text{C-F}} = 7.5$  Hz), 124.9 (d,  $J_{\text{C-F}} = 23.6$  Hz) 113.1 (d,  $J_{\text{C-F}} = 23.5$  Hz) 112.4 (d,  $J_{\text{C-F}} = 8.6$  Hz), 45.2, 25.4, 24.2; HRMS (ESI)  $m/z$  calcd for  $\text{C}_{13}\text{H}_{14}\text{FN}_2\text{O}_2$ : 249.1034, found 249.1035 ( $\text{M}+\text{H}$ ) $^+$ .

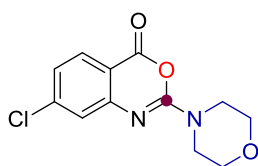

**7-Chloro-2-morpholino-4H-benzo[d][1,3]oxazin-4-one (5u)**

White solid; yield 76%; 101 mg; m.p. 181–182 °C; IR (KBr,  $\text{cm}^{-1}$ )  $\nu$ : 2977, 2870, 1765, 1590, 1434, 1290, 878, 771;  $^1\text{H}$  NMR (300 MHz,  $\text{CDCl}_3$ )  $\delta$  (ppm) 7.91 (d,  $J = 8.4$  Hz, 1H), 7.24–7.23 (m, 1H), 7.12–7.08 (m, 1H), 3.76 (s, 8H);  $^{13}\text{C}$  NMR (75 MHz,  $\text{CDCl}_3$ )  $\delta$  (ppm) 158.8, 153.7, 151.6, 143.1, 130.0, 124.1, 123.9, 110.7, 66.3, 44.4; HRMS (ESI)  $m/z$  calcd for  $\text{C}_{12}\text{H}_{12}\text{ClN}_2\text{O}_3$ : 267.0531, found 267.0537 ( $\text{M}+\text{H}$ ) $^+$ .

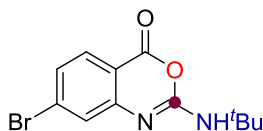

**7-Bromo-2-(tert-butylamino)-4H-benzo[d][1,3]oxazin-4-one (5v)**

Yellow solid; yield 68%; 101 mg; m.p. 176–177 °C; IR (KBr,  $\text{cm}^{-1}$ )  $\nu$ : 3308, 2976, 2960, 2360, 1738, 1439, 1210, 769;  $^1\text{H}$  NMR (300 MHz,  $\text{CDCl}_3$ )  $\delta$  (ppm) 7.84 (d,  $J = 8.4$  Hz, 1H), 7.46 (d,  $J = 1.5$  Hz, 1H), 7.27–7.24 (m, 1H), 5.04 (s, 1H), 1.48 (s, 9H);  $^{13}\text{C}$  NMR (75 MHz,  $\text{CDCl}_3$ )  $\delta$  (ppm) 159.4, 152.6, 151.2, 131.5, 129.8, 127.3, 126.8,

112.0, 52.2, 28.7; HRMS (ESI)  $m/z$  calcd for  $C_{12}H_{14}BrN_2O_2$ : 297.0233, found 297.0231 (M+H)<sup>+</sup>.

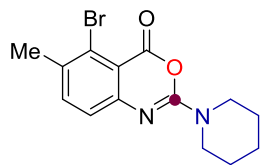

**5-Bromo-6-methyl-2-(piperidin-1-yl)-4H-benzo[d][1,3]oxazin-4-one (5w)**

White solid; yield 81%; 131 mg; m.p. 103–104 °C; IR (KBr,  $cm^{-1}$ )  $\nu$ : 2938, 2854, 2360, 1768, 1590, 1447, 1267, 1017, 825, 688; <sup>1</sup>H NMR (300 MHz,  $CDCl_3$ )  $\delta$  (ppm) 7.40 (d,  $J = 8.4$  Hz, 1H), 7.07 (d,  $J = 8.4$  Hz, 1H), 3.69 (d,  $J = 5.7$  Hz, 4H), 2.42 (s, 3H), 1.64 (t,  $J = 7.2$  Hz, 6H); <sup>13</sup>C NMR (75 MHz,  $CDCl_3$ )  $\delta$  (ppm) 157.1, 152.9, 151.7, 137.6, 134.3, 124.6, 123.2, 111.1, 45.0, 25.5, 24.2, 23.6; HRMS (ESI)  $m/z$  calcd for  $C_{14}H_{16}BrN_2O_2$ : 323.0390, found 323.0390 (M+H)<sup>+</sup>.

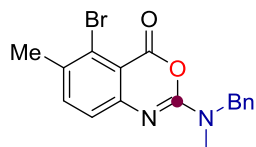

**2-(Benzyl(methyl)amino)-5-bromo-6-methyl-4H-benzo[d][1,3]oxazin-4-one (5x)**

White solid; yield 90%; 162 mg; m.p. 97–98 °C; IR (KBr,  $cm^{-1}$ )  $\nu$ : 2954, 2360, 1771, 1627, 1464, 1293, 1050, 841, 724; <sup>1</sup>H NMR (300 MHz,  $CDCl_3$ )  $\delta$  (ppm) 7.43 (d,  $J = 8.4$  Hz, 1H), 7.37–7.29 (m, 5H), 7.14 (d,  $J = 8.4$  Hz, 1H), 4.74 (s, 2H), 3.10 (s, 3H), 2.44 (s, 3H); <sup>13</sup>C NMR (75 MHz,  $CDCl_3$ )  $\delta$  (ppm) 156.9, 153.9, 151.5, 137.7, 136.2, 134.6, 128.7, 127.7, 124.7, 123.4, 111.3, 52.4, 34.4, 23.7; HRMS (ESI)  $m/z$  calcd for  $C_{17}H_{16}BrN_2O_2$ : 359.0390, found 359.0397 (M+H)<sup>+</sup>.

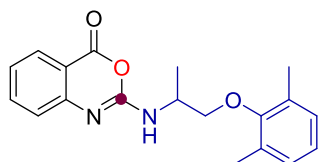

**2-((1-(2,6-Dimethylphenoxy)propan-2-yl)amino)-4H-benzo[d][1,3]oxazin-4-one (6)**

White solid; yield 72%; 117 mg; m.p. 154–155 °C; IR (KBr,  $cm^{-1}$ )  $\nu$ : 3280, 3054, 2991, 1742, 1637, 1478, 1196, 1019, 762; <sup>1</sup>H NMR (300 MHz,  $CDCl_3$ )  $\delta$  (ppm) 8.05

(d,  $J = 7.8$  Hz, 1H), 7.65 (t,  $J = 7.5$  Hz, 1H), 7.29-7.17 (m, 2H), 7.02-6.91 (m, 3H), 5.42 (s, 1H), 4.42 (s, 1H), 3.91-3.85 (m, 2H), 2.28 (s, 6H), 1.54 (d,  $J = 6.6$  Hz, 3H);  $^{13}\text{C}$  NMR (75 MHz,  $\text{CDCl}_3$ )  $\delta$  (ppm) 159.8, 154.8, 153.1, 150.2, 136.7, 130.7, 129.0, 128.8, 124.3, 124.2, 123.8, 113.3, 73.4, 47.7, 17.7, 16.2; HRMS (ESI)  $m/z$  calcd for  $\text{C}_{19}\text{H}_{21}\text{N}_2\text{O}_3$ : 325.1547, found 325.1546 ( $\text{M}+\text{H}$ ) $^+$ .

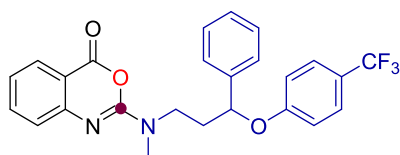

**2-(Methyl(3-phenyl-3-(4-(trifluoromethyl)phenoxy)propyl)amino)-4H-benzo[*d*][1,3]oxazin-4-one (7)**

White solid; yield 71%; 161 mg; m.p. 94–95 °C; IR (KBr,  $\text{cm}^{-1}$ )  $\nu$ : 2925, 2843, 1763, 1370, 1369, 1260, 912, 694;  $^1\text{H}$  NMR (300 MHz,  $\text{CDCl}_3$ )  $\delta$  (ppm) 7.91 (d,  $J = 7.8$  Hz, 1H), 7.53 (t,  $J = 7.5$  Hz, 1H), 7.35-7.27 (m, 7H), 7.08 (t,  $J = 7.5$  Hz, 2H), 6.85 (d,  $J = 8.7$  Hz, 2H), 5.32 (q,  $J = 3.0$  Hz, 1H), 3.83-3.81 (m, 2H), 3.17 (s, 3H), 2.38-2.15 (m, 2H);  $^{13}\text{C}$  NMR (75 MHz,  $\text{CDCl}_3$ )  $\delta$  (ppm) 160.0, 159.8, 154.1, 150.6, 140.5, 136.5, 130.0, 128.9, 128.5, 126.7 (q,  $J_{\text{C-F}} = 3.7$  Hz), 126.0, 124.3 (q,  $J_{\text{C-F}} = 269.4$  Hz), 124.0, 123.1, 115.5, 112.0, 78.0, 46.7, 36.5, 35.3; HRMS (ESI)  $m/z$  calcd for  $\text{C}_{25}\text{H}_{22}\text{F}_3\text{N}_2\text{O}_3$ : 455.1557, found 455.1582 ( $\text{M}+\text{H}$ ) $^+$ .

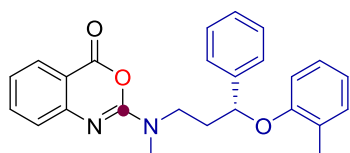

**(*R*)-2-(Methyl(3-phenyl-3-(*o*-tolylloxy)propyl)amino)-4H-benzo[*d*][1,3]oxazin-4-one (8)**

Yellow oil; yield 74%; 148 mg; IR (KBr,  $\text{cm}^{-1}$ )  $\nu$ : 2923.5, 2606.2, 1759.2, 1598.7, 1473.9, 1237.5, 1000.9, 751.2, 700.9;  $^1\text{H}$  NMR (300 MHz,  $\text{CDCl}_3$ )  $\delta$  (ppm) 7.95 (dd,  $J = 8.1$  Hz,  $J = 1.2$  Hz, 1H), 7.58-7.53 (m, 1H), 7.36-7.28 (m, 4H), 7.26-7.21 (m, 1H), 7.16-7.06 (m, 3H), 6.93-6.88 (m, 1H), 6.76-6.71 (m, 1H), 6.58-6.55 (m, 1H), 5.26 (q,  $J = 3.9$ , 1H), 3.88-3.74 (m, 2H), 3.13 (s, 3H), 2.38 (s, 3H), 2.35-2.23 (m, 2H);  $^{13}\text{C}$  NMR (75 MHz,  $\text{CDCl}_3$ )  $\delta$  (ppm) 159.8, 155.5, 153.9, 150.8, 141.3, 136.5, 130.6, 128.7, 128.5, 127.6, 126.8, 126.5, 125.6, 124.0, 122.9, 120.3, 112.4, 112.0, 46.8, 36.6, 35.4, 16.5; HRMS (ESI)  $m/z$  calcd for  $\text{C}_{25}\text{H}_{25}\text{N}_2\text{O}_3$ : 401.1860, found 401.1872 ( $\text{M}+\text{H}$ ) $^+$ .

## References

- [1] Krantz, A.; Spencer, R. W.; Tam, T. F.; Liak, T. J.; Copp, L. J.; Thomas, E. M.; Rafferty, S. P. *J. Med. Chem.* **1990**, *33*, 464–479.
- [2] Callingham M., Blum F.; Pavé G. *Org. Lett.* **2015**, *17*, 4930–4932.
- [3] Neumann U.; Schechter N M.; Gütschow M. *Bioorg. Med. Chem.* **2001**, *9*, 947–954.
- [4] Steinebach, C.; Schulz-Fincke, A. C.; Schnakenburg, G.; Gütschow, M. *RSC Adv.* **2016**, *6*, 15430–15440.
- [5] Reich H J.; Sikorski W H. *J. Org. Chem.* **1999**, *64*, 14–15.
- [6] Zhang, Y.; Yin, Z., Wang, H.; Wu, X.-F. *Org. Lett.* **2019**, *21*, 3242–3246.

## 7. NMR spectroscopic data for products 4-8

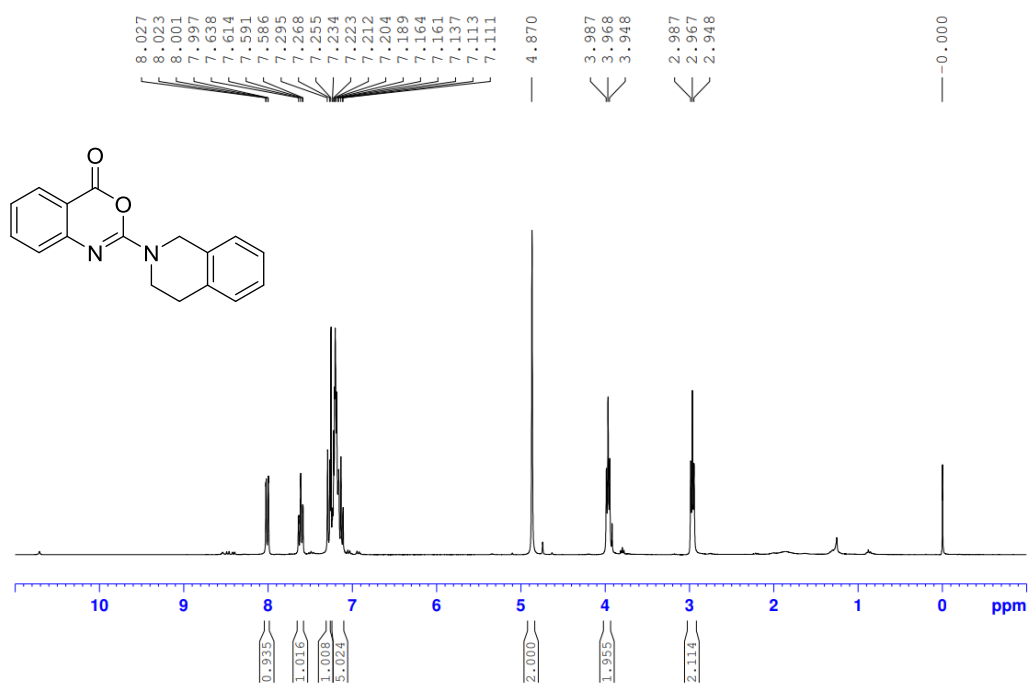

**Figure S-1** <sup>1</sup>H NMR spectrum of compound **4a** (300 MHz, CDCl<sub>3</sub>)

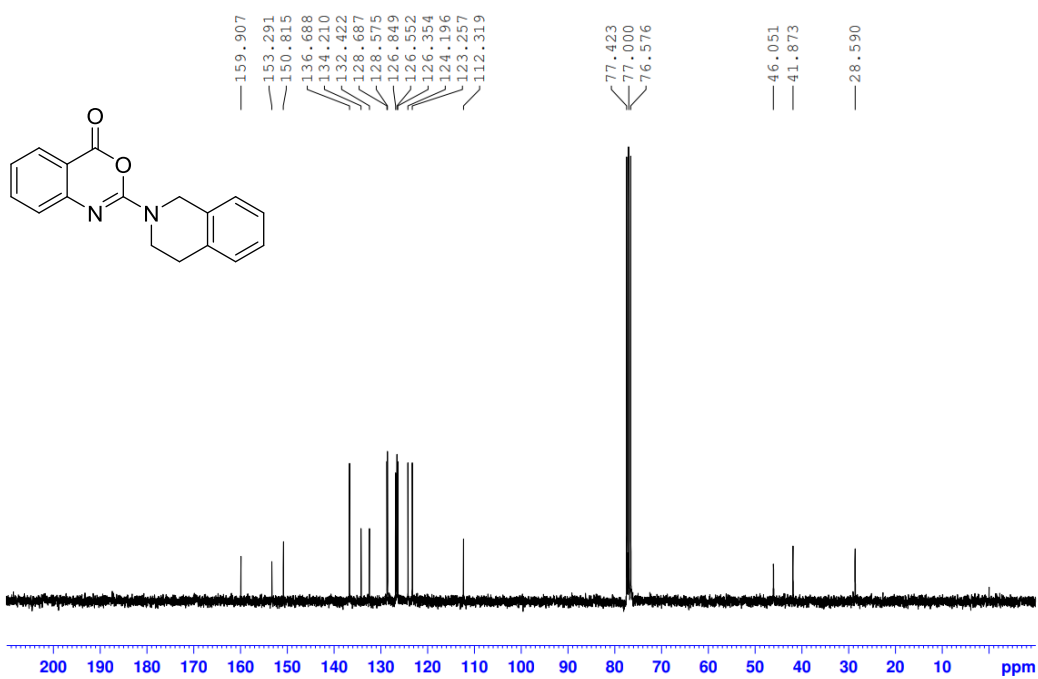

**Figure S-2** <sup>13</sup>C NMR spectrum of compound **4a** (75 MHz, CDCl<sub>3</sub>)

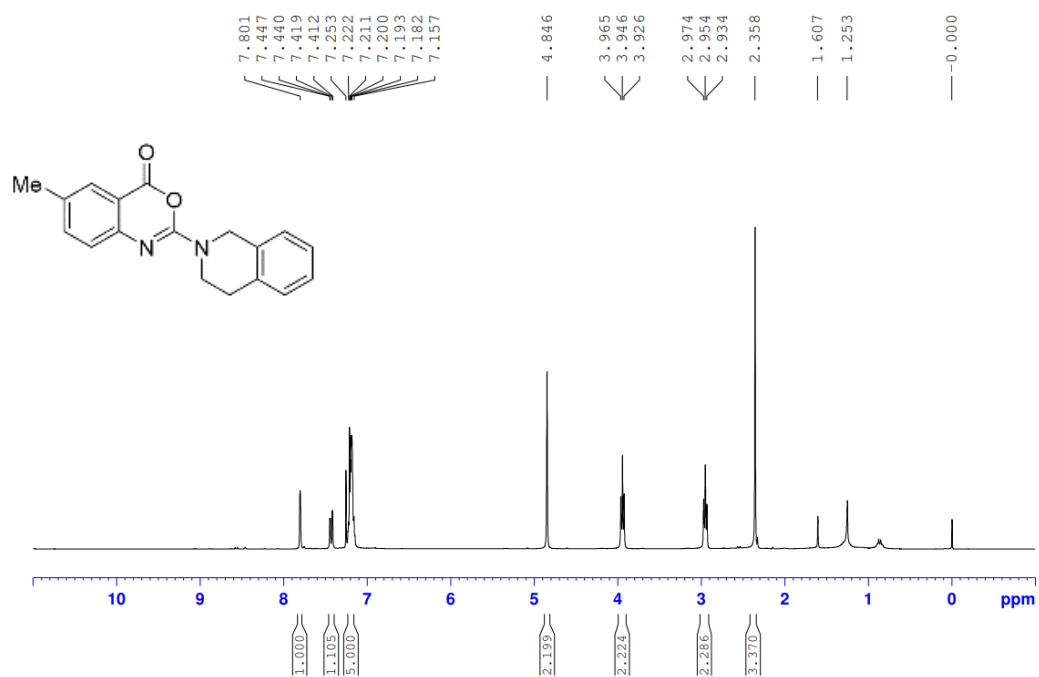

**Figure S-3** <sup>1</sup>H NMR spectrum of compound **4b** (300 MHz, CDCl<sub>3</sub>)

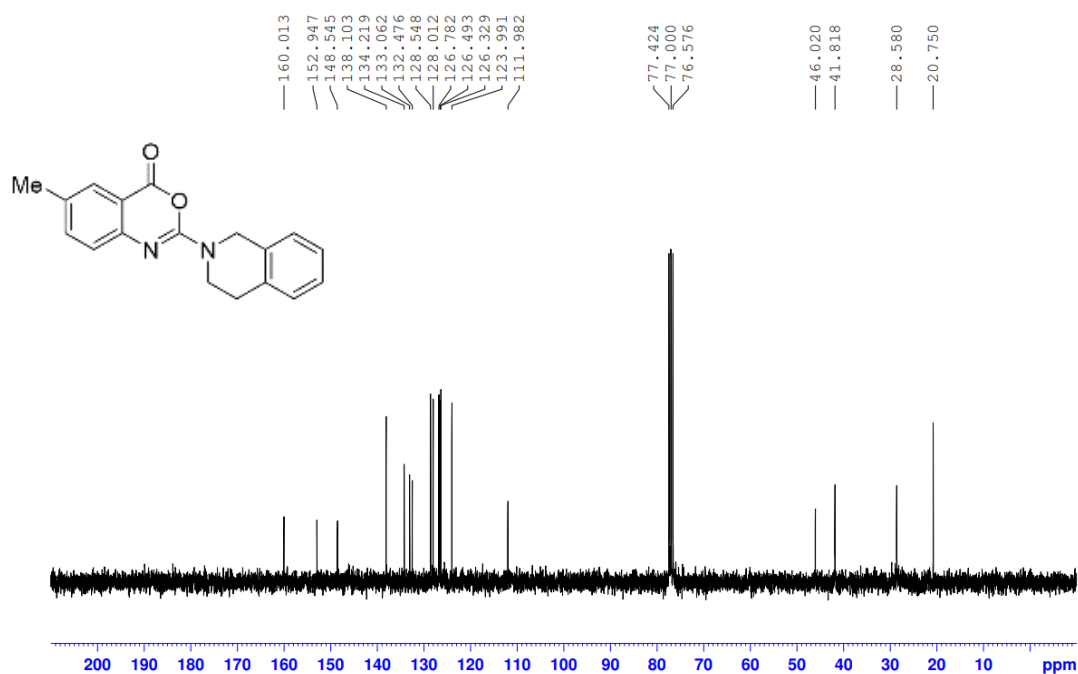

**Figure S-4** <sup>13</sup>C NMR spectrum of compound **4b** (75 MHz, CDCl<sub>3</sub>)



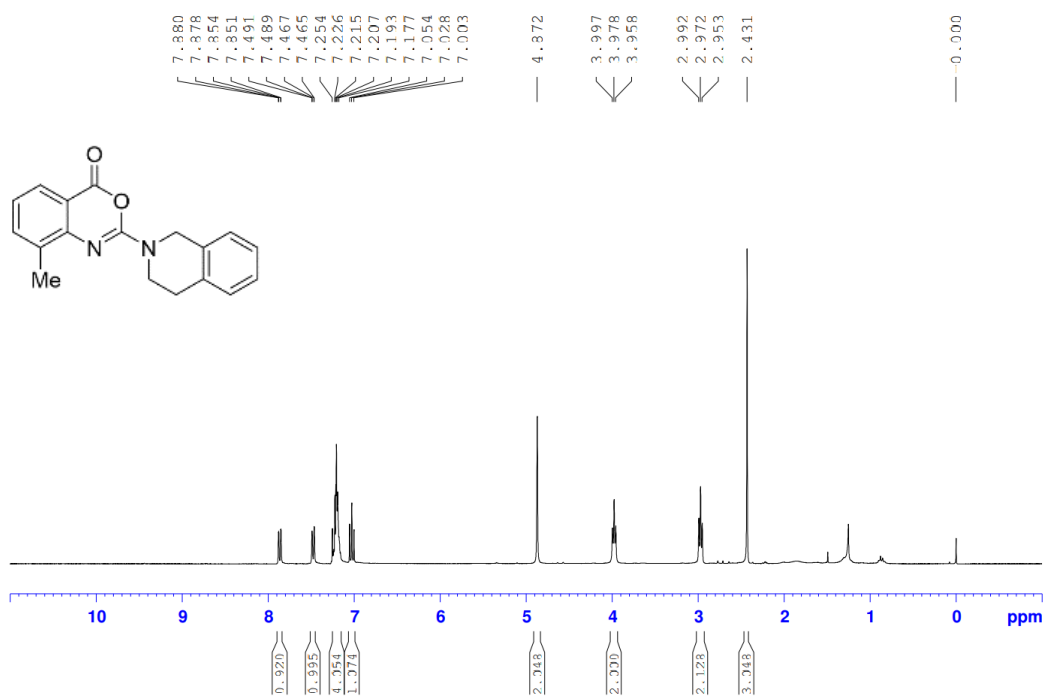

**Figure S-5**  $^1\text{H}$  NMR spectrum of compound **4c** (300 MHz,  $\text{CDCl}_3$ )

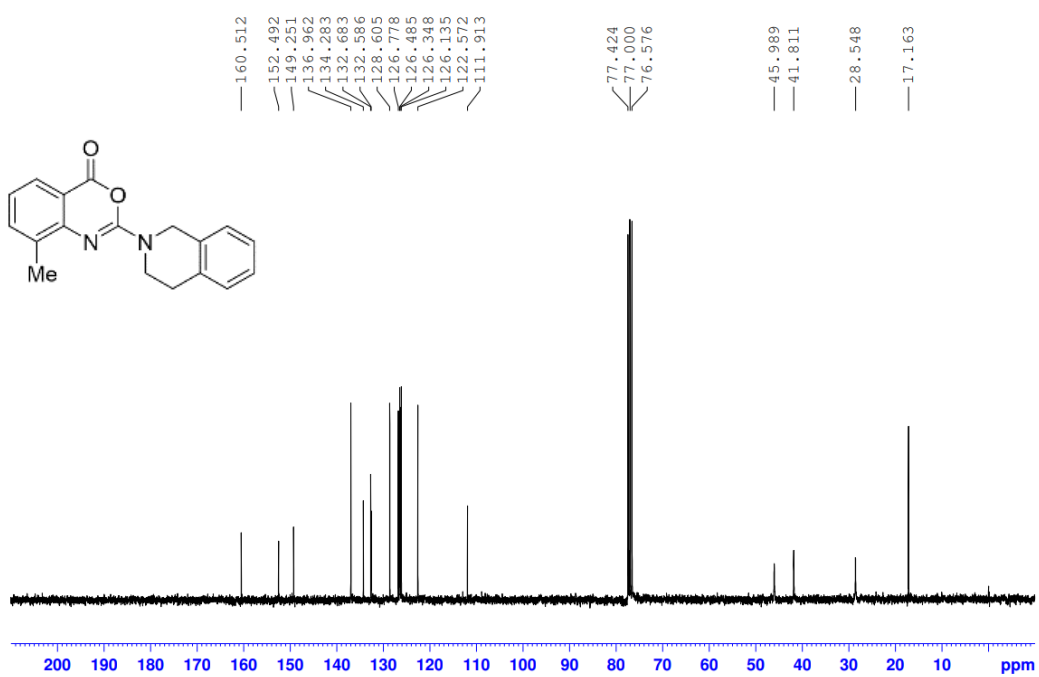

**Figure S-6**  $^{13}\text{C}$  NMR spectrum of compound **4c** (75 MHz,  $\text{CDCl}_3$ )

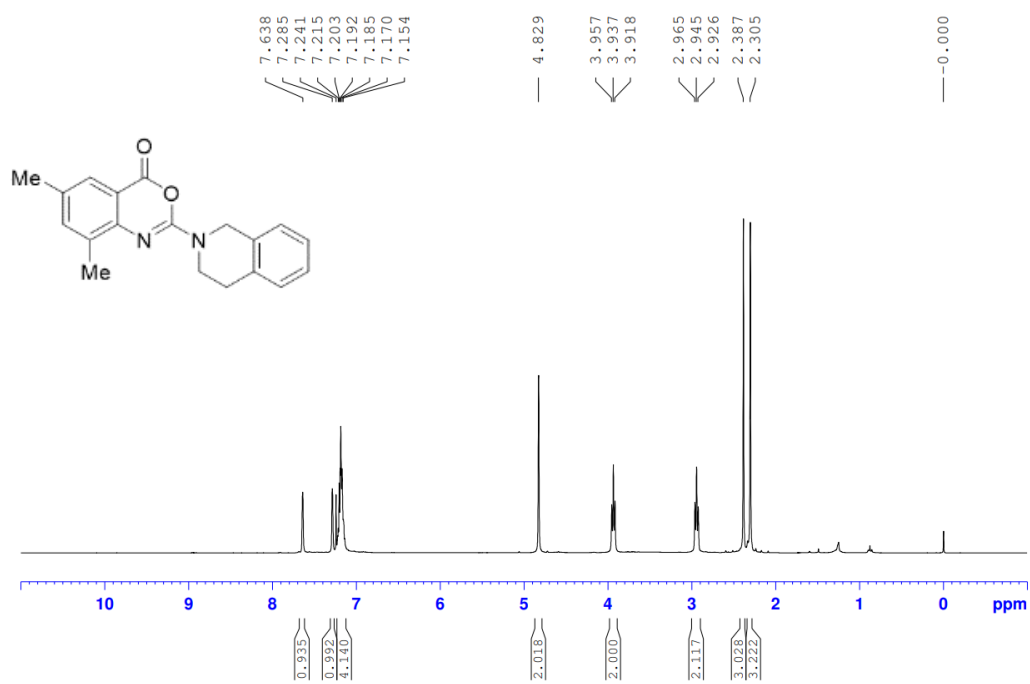

**Figure S-7** <sup>1</sup>H NMR spectrum of compound **4d** (300 MHz, CDCl<sub>3</sub>)

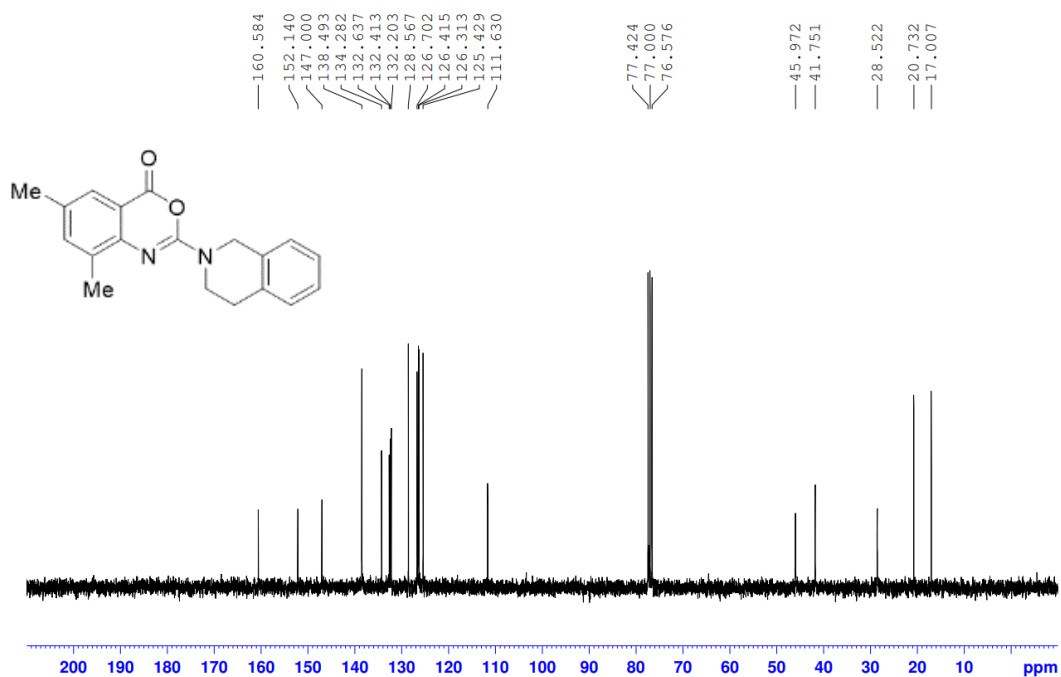

**Figure S-8** <sup>13</sup>C NMR spectrum of compound **4d** (75 MHz, CDCl<sub>3</sub>)

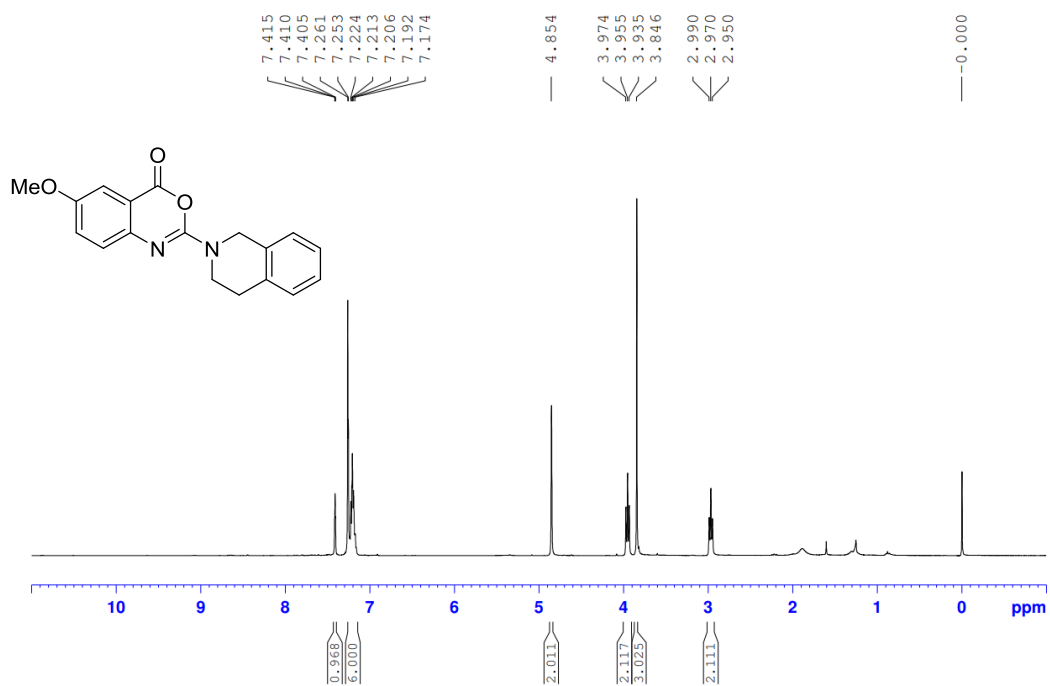

**Figure S-9** <sup>1</sup>H NMR spectrum of compound **4e** (300 MHz, CDCl<sub>3</sub>)

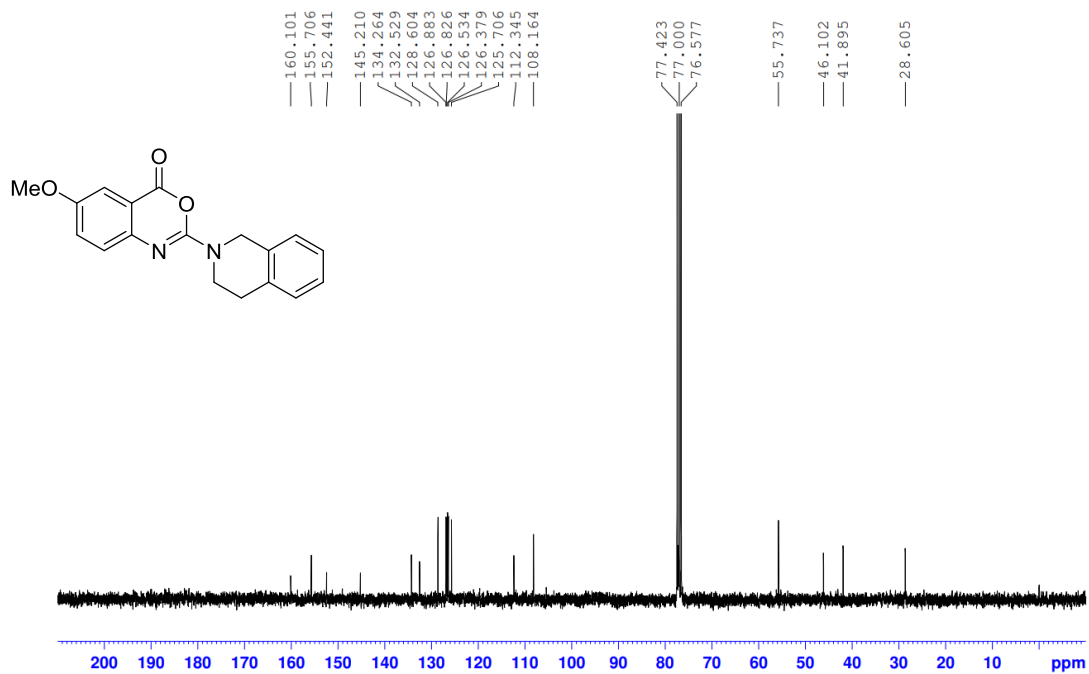

**Figure S-10** <sup>13</sup>C NMR spectrum of compound **4e** (75 MHz, CDCl<sub>3</sub>)

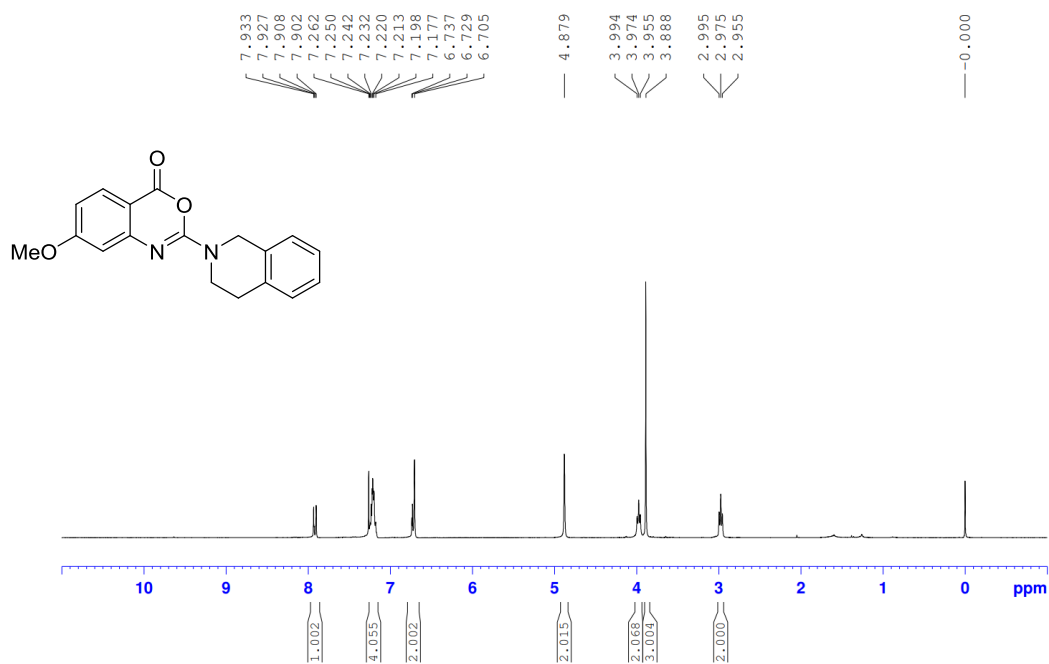

**Figure S-11** <sup>1</sup>H NMR spectrum of compound **4f** (300 MHz, CDCl<sub>3</sub>)

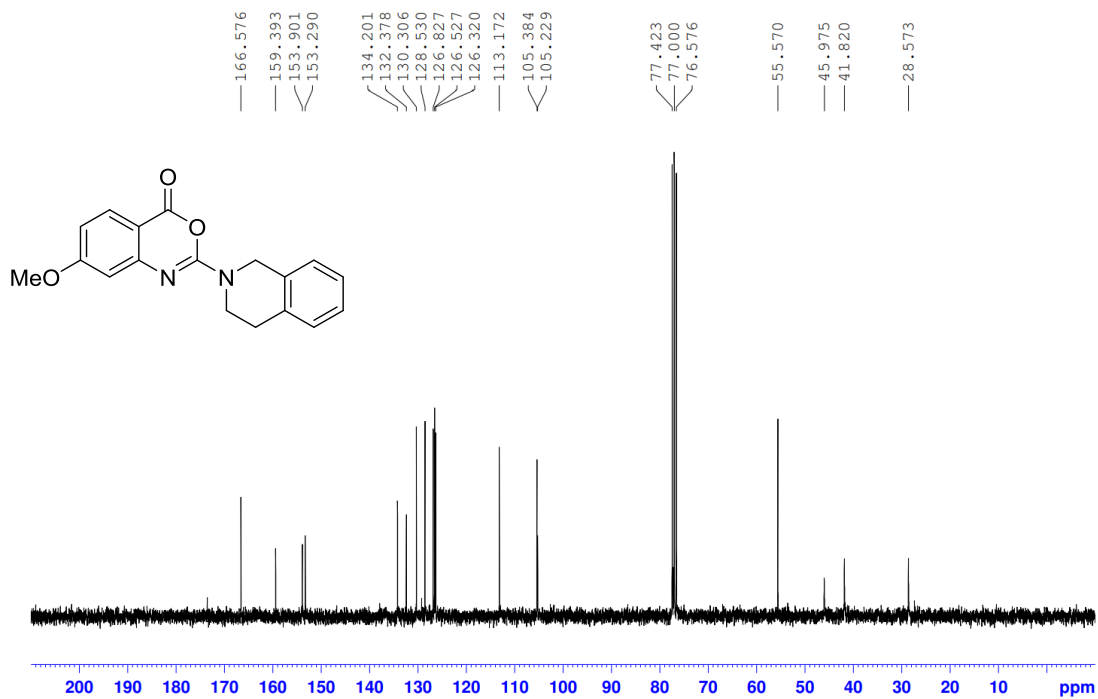

**Figure S-12** <sup>13</sup>C NMR spectrum of compound **4f** (75 MHz, CDCl<sub>3</sub>)

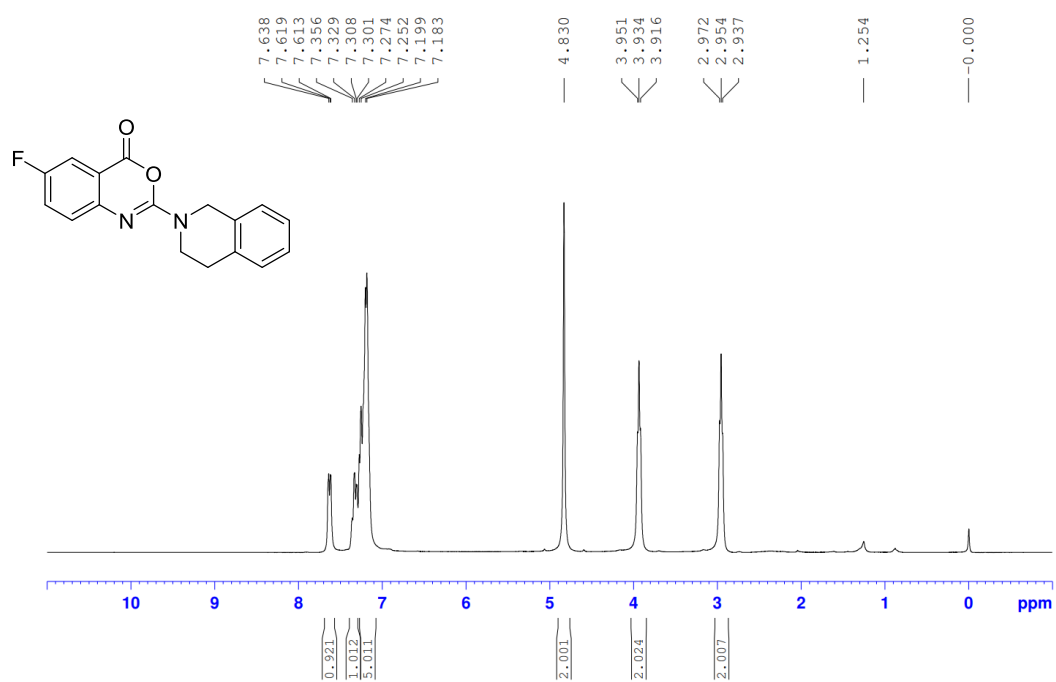

**Figure S-13** <sup>1</sup>H NMR spectrum of compound **4g** (300 MHz, CDCl<sub>3</sub>)

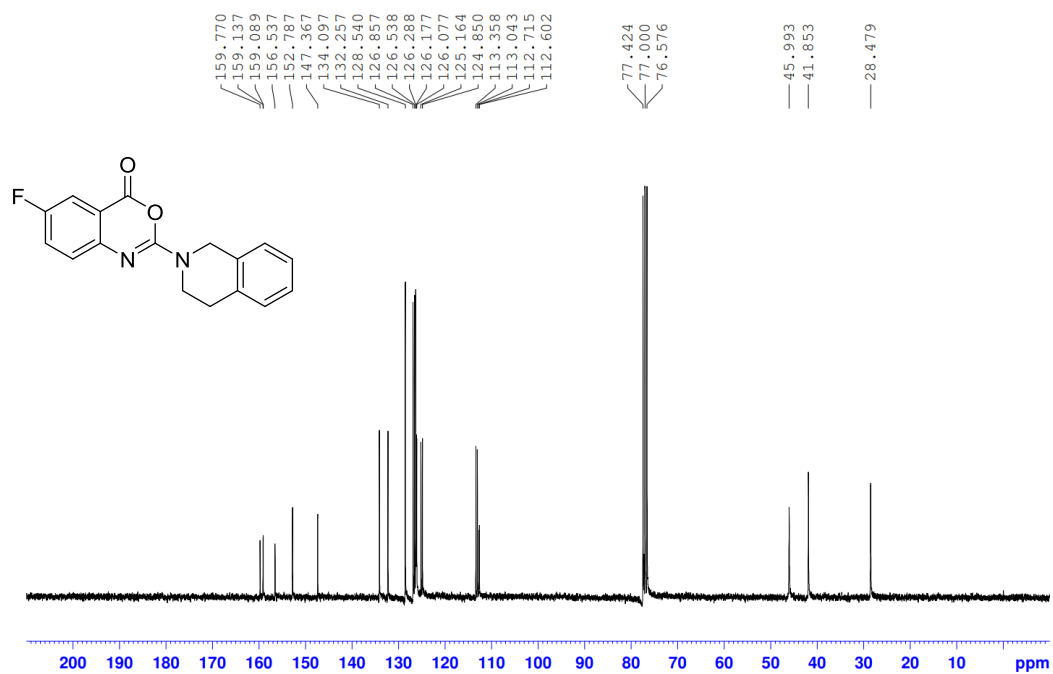

**Figure S-14** <sup>13</sup>C NMR spectrum of compound **4g** (75 MHz, CDCl<sub>3</sub>)

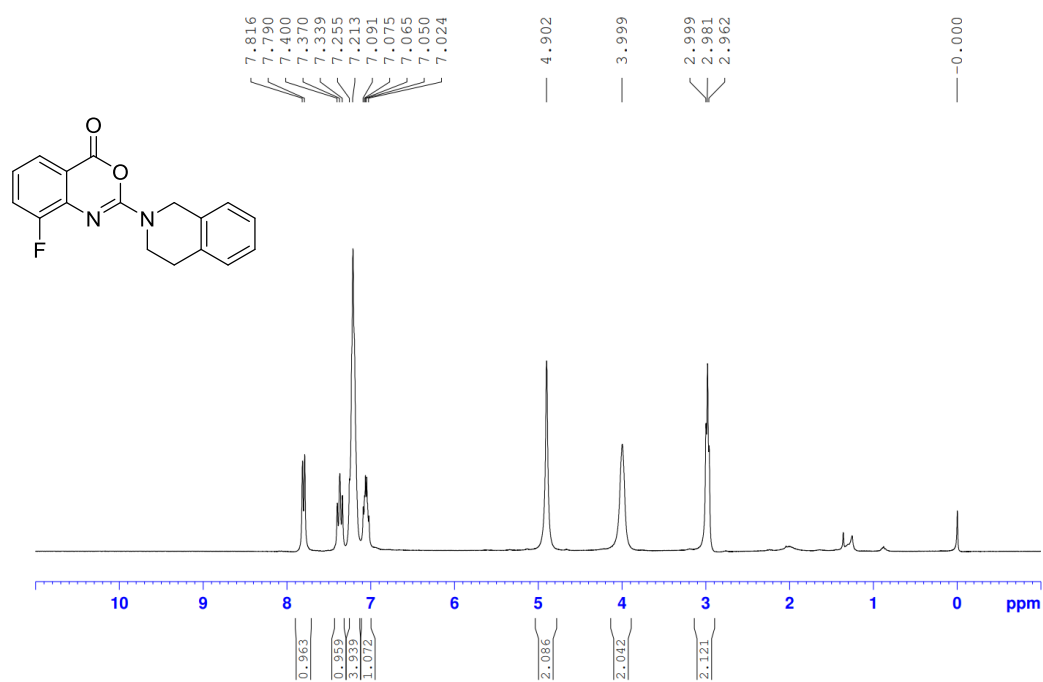

**Figure S-15**  $^1\text{H}$  NMR spectrum of compound **4h** (300 MHz,  $\text{CDCl}_3$ )

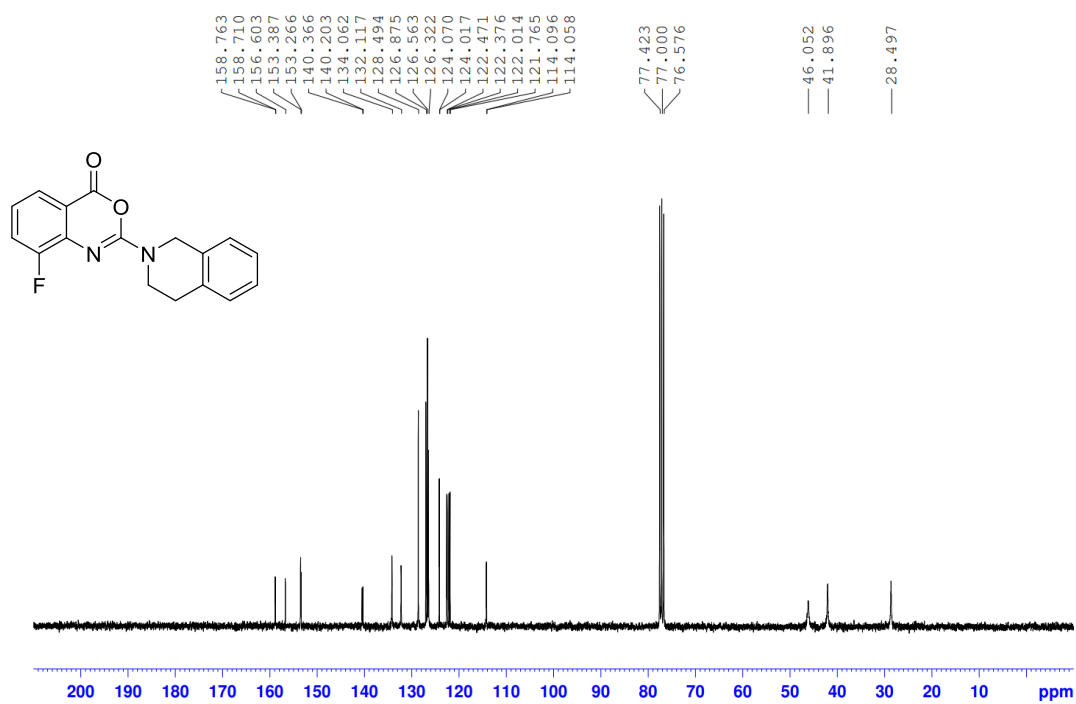

**Figure S-16**  $^{13}\text{C}$  NMR spectrum of compound **4h** (75 MHz,  $\text{CDCl}_3$ )

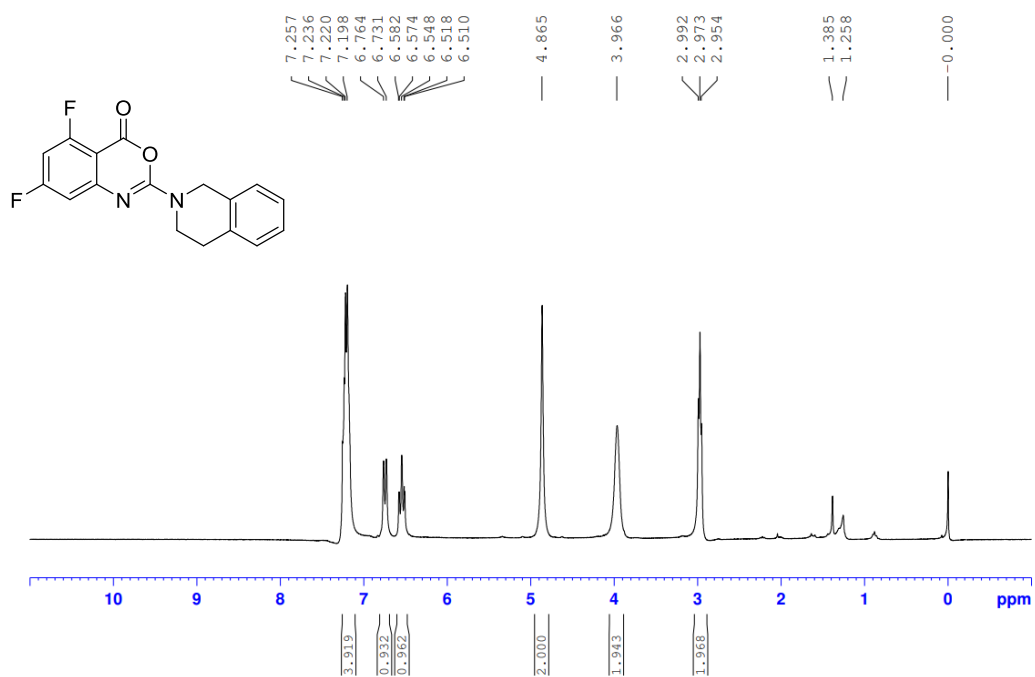

**Figure S-17** <sup>1</sup>H NMR spectrum of compound **4i** (300 MHz, CDCl<sub>3</sub>)

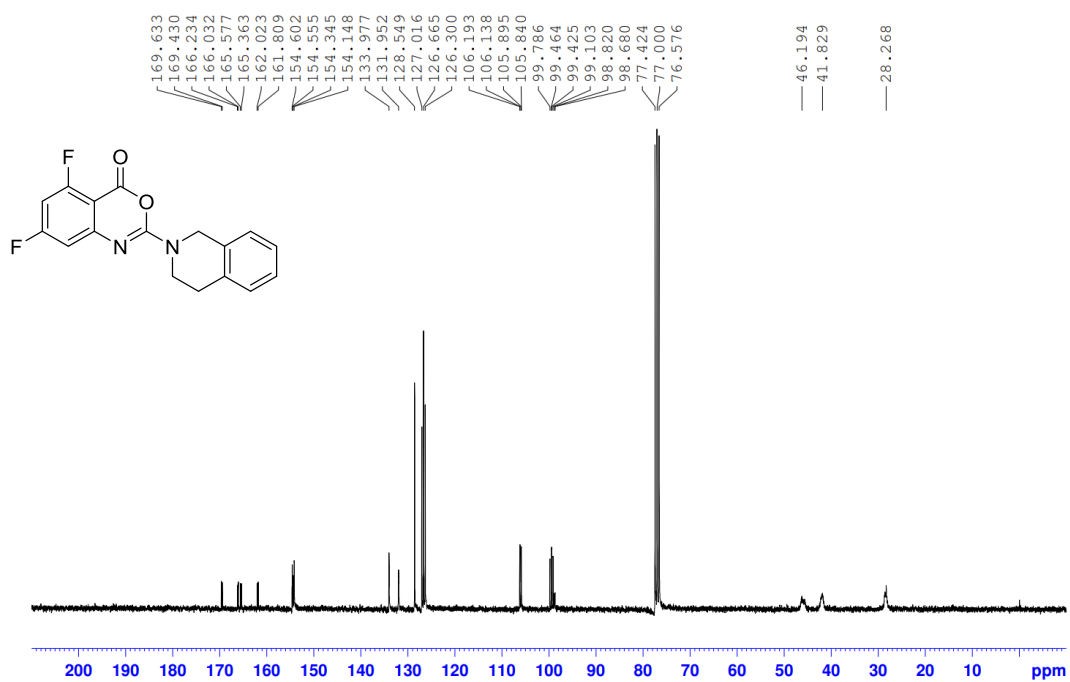

**Figure S-18** <sup>13</sup>C NMR spectrum of compound **4i** (75 MHz, CDCl<sub>3</sub>)

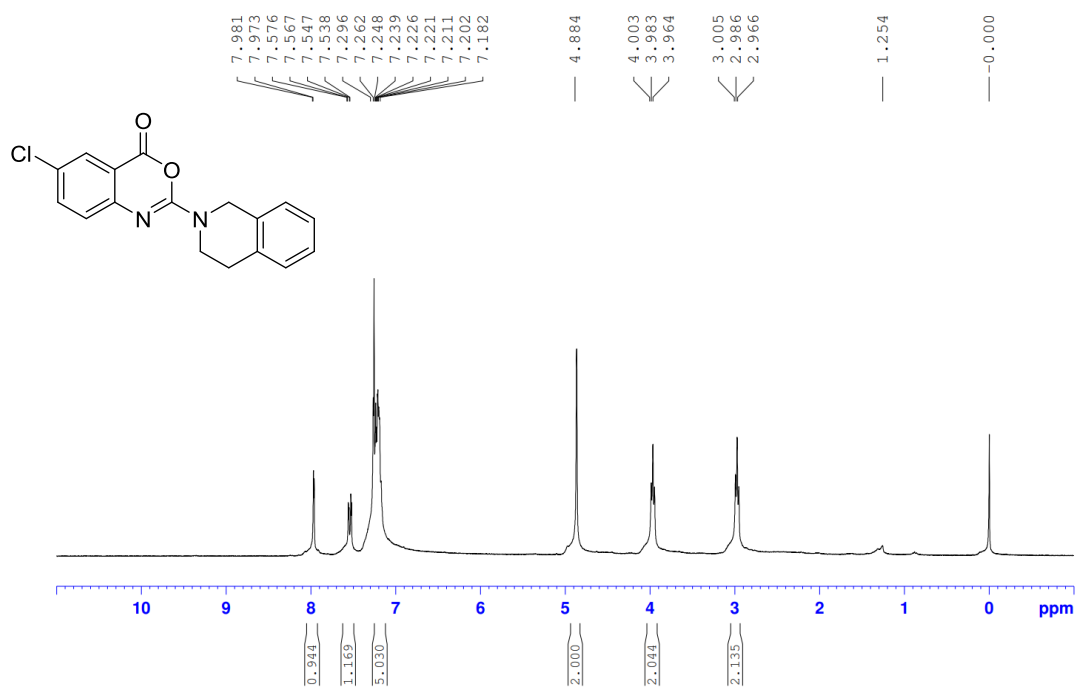

**Figure S-19**  $^1\text{H}$  NMR spectrum of compound **4j** (300 MHz,  $\text{CDCl}_3$ )

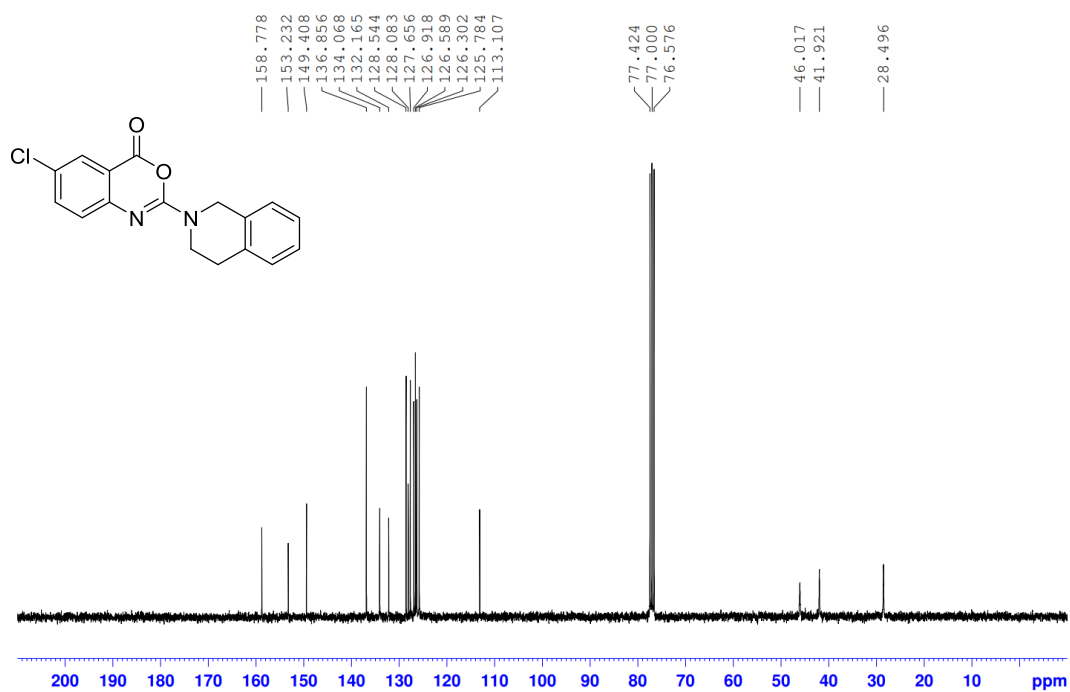

**Figure S-20**  $^{13}\text{C}$  NMR spectrum of compound **4j** (75 MHz,  $\text{CDCl}_3$ )



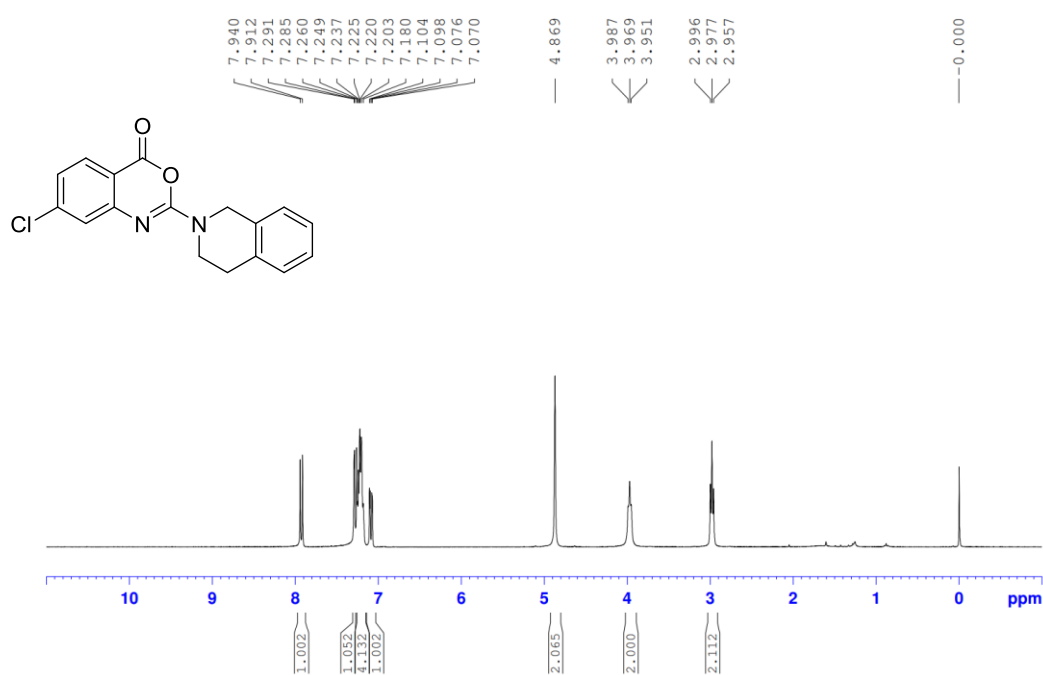

**Figure S-21**  $^1\text{H}$  NMR spectrum of compound **4k** (300 MHz,  $\text{CDCl}_3$ )

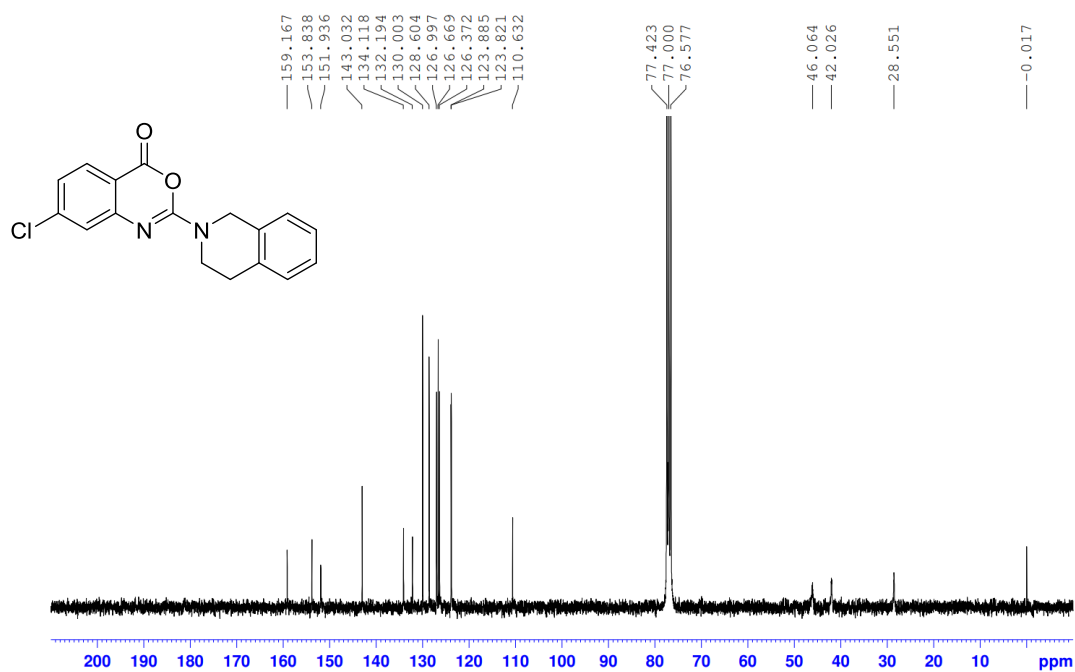

**Figure S-22**  $^{13}\text{C}$  NMR spectrum of compound **4k** (75 MHz,  $\text{CDCl}_3$ )

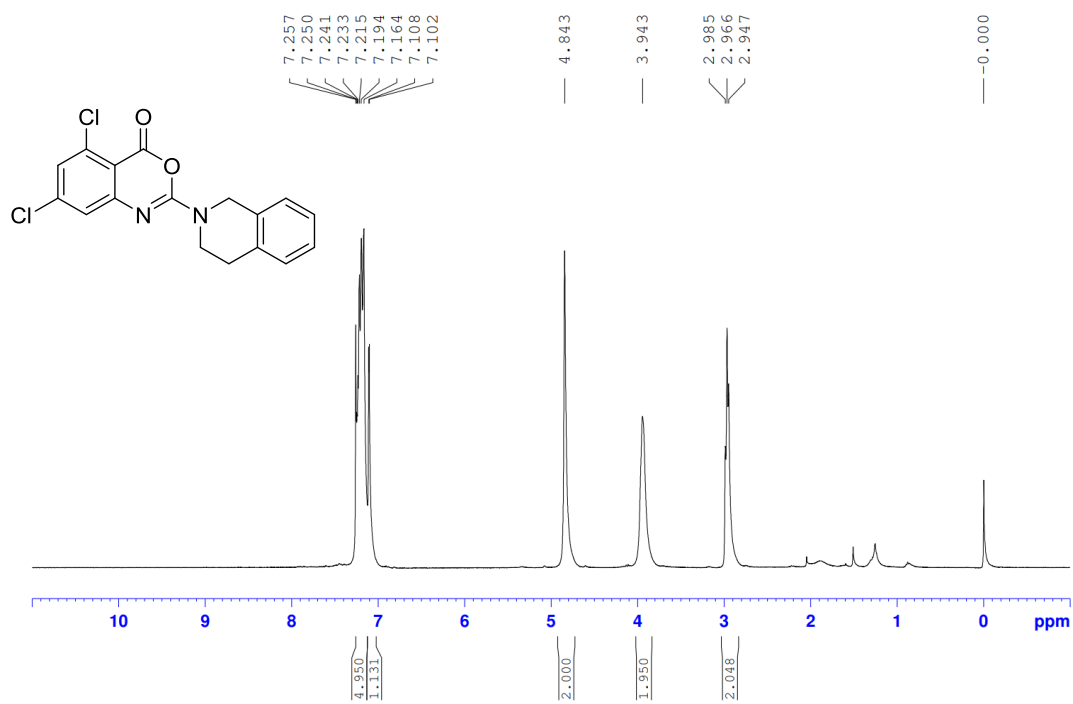

**Figure S-23**  $^1\text{H NMR}$  spectrum of compound **4I** (300 MHz,  $\text{CDCl}_3$ )

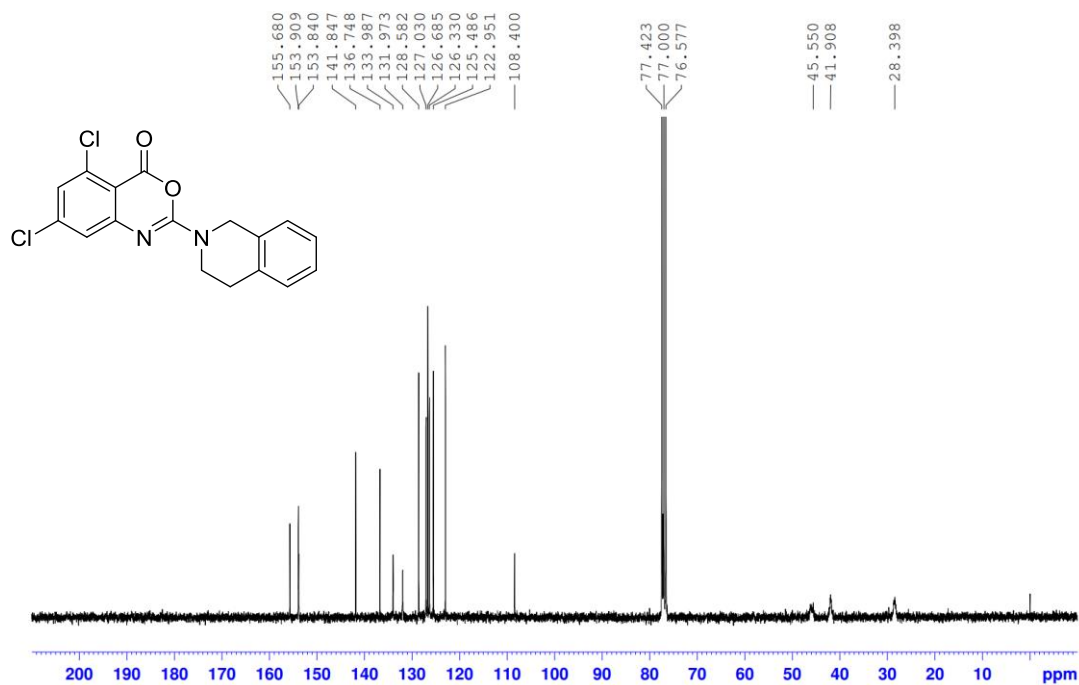

**Figure S-24**  $^{13}\text{C NMR}$  spectrum of compound **4I** (75 MHz,  $\text{CDCl}_3$ )

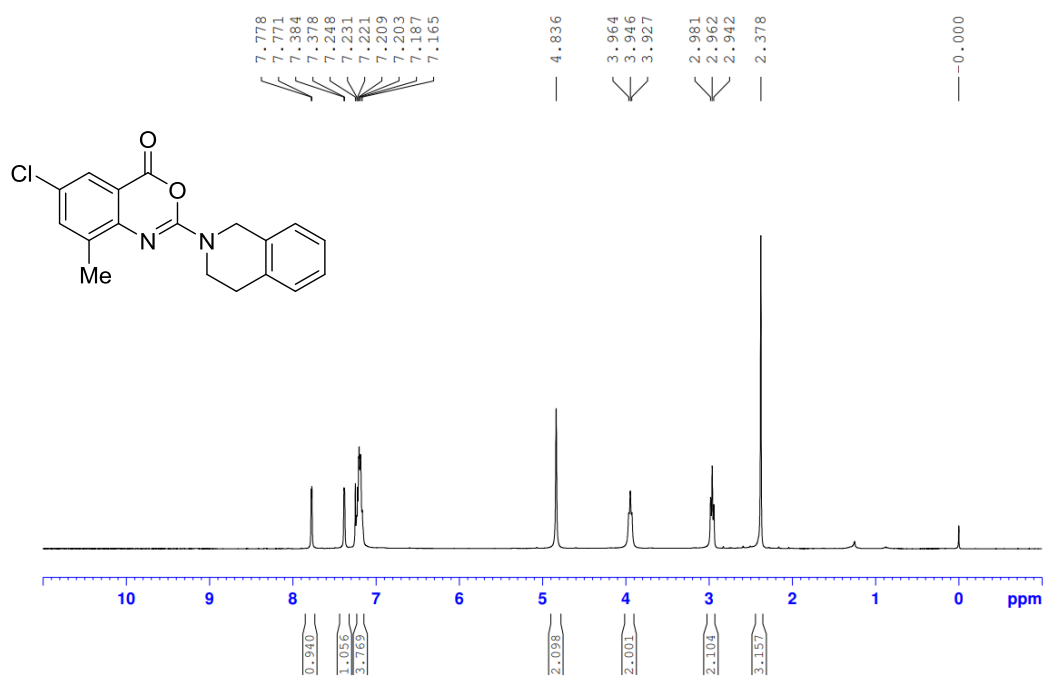

**Figure S-25** <sup>1</sup>H NMR spectrum of compound **4m** (300 MHz, CDCl<sub>3</sub>)

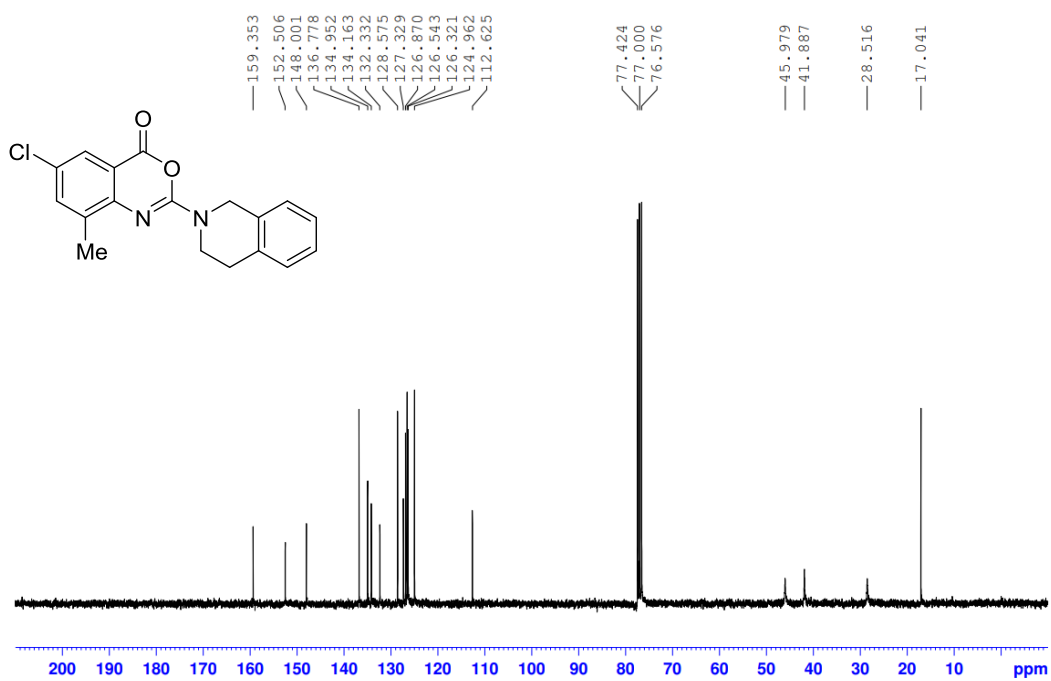

**Figure S-26** <sup>13</sup>C NMR spectrum of compound **4m** (75 MHz, CDCl<sub>3</sub>)

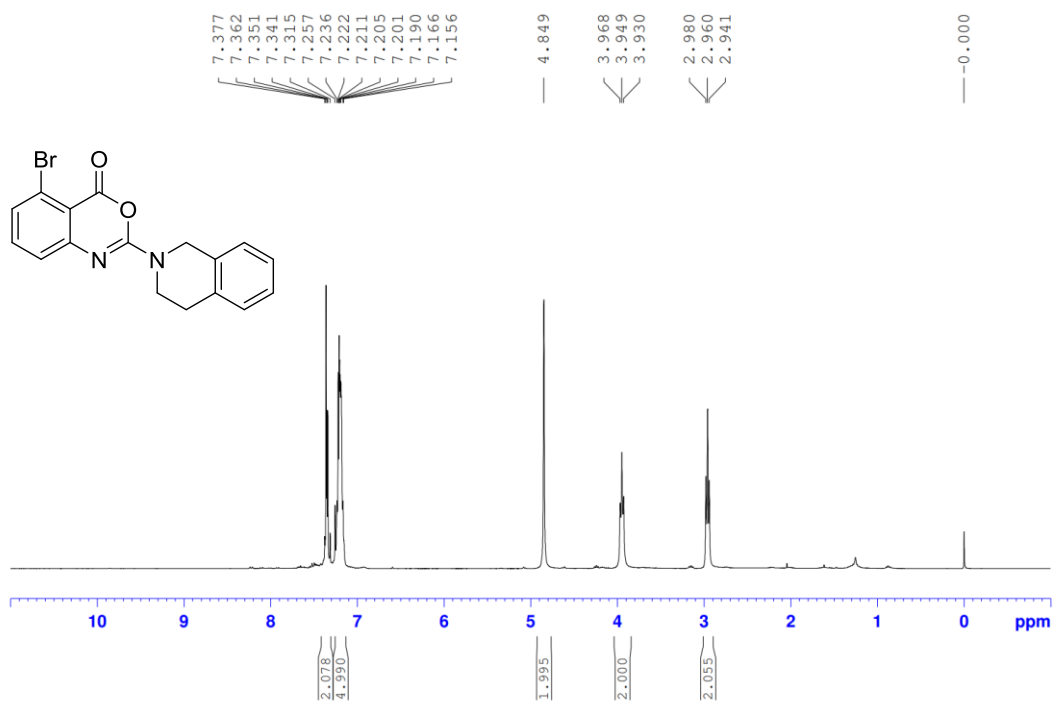

**Figure S-27**  $^1\text{H}$  NMR spectrum of compound **4n** (300 MHz,  $\text{CDCl}_3$ )

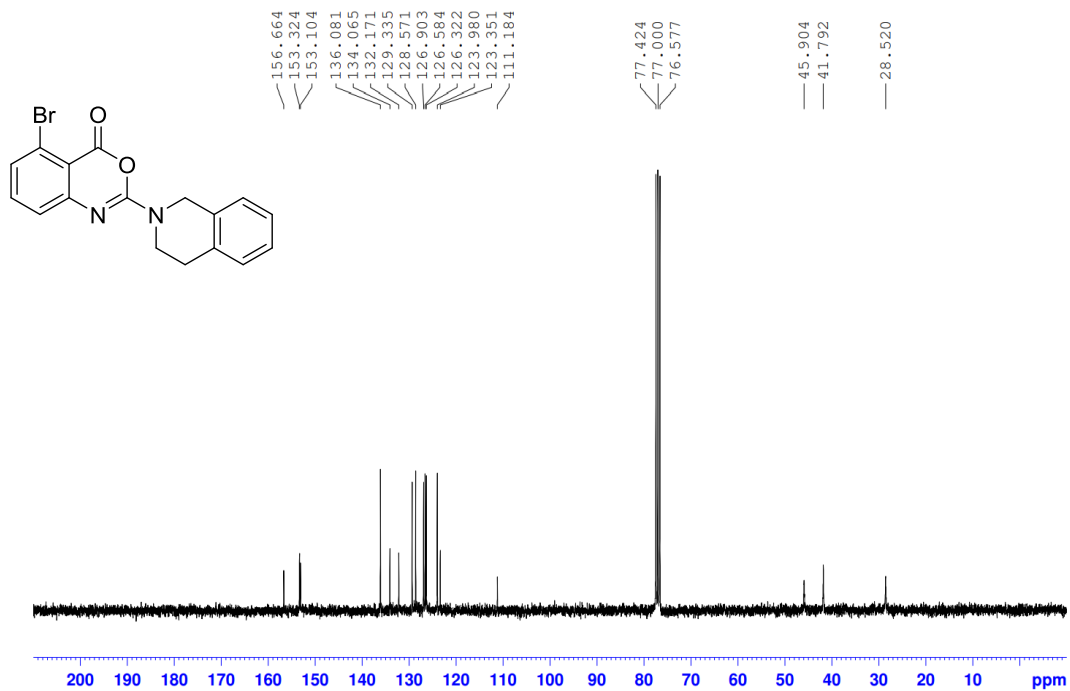

**Figure S-28**  $^{13}\text{C}$  NMR spectrum of compound **4n** (75 MHz,  $\text{CDCl}_3$ )

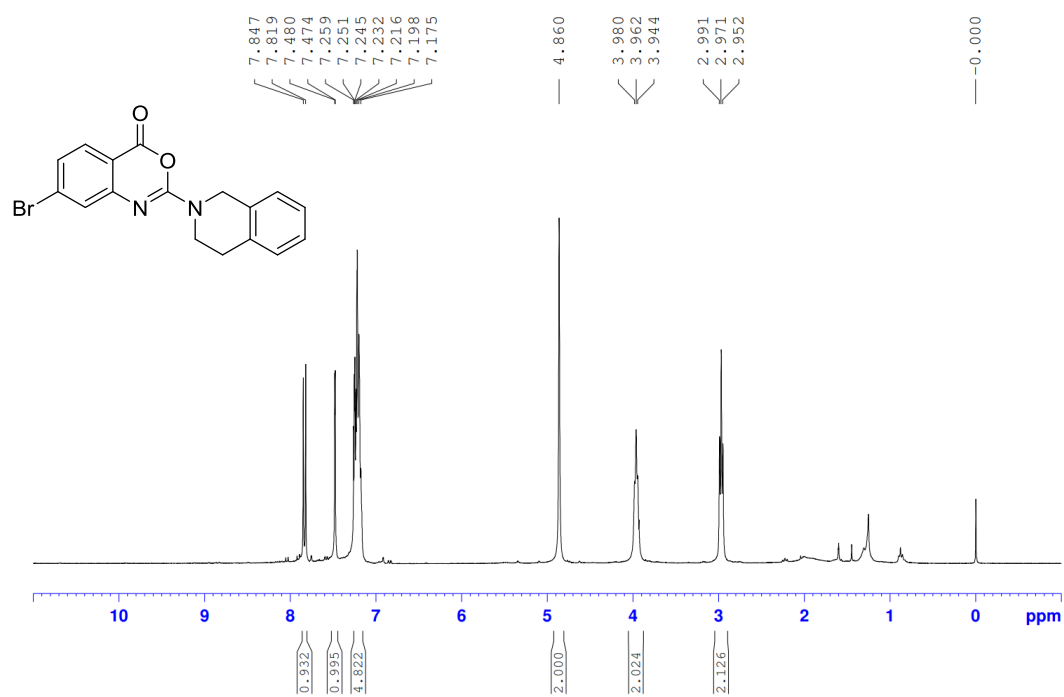

Figure S-29 <sup>1</sup>H NMR spectrum of compound **4o** (300 MHz, CDCl<sub>3</sub>)

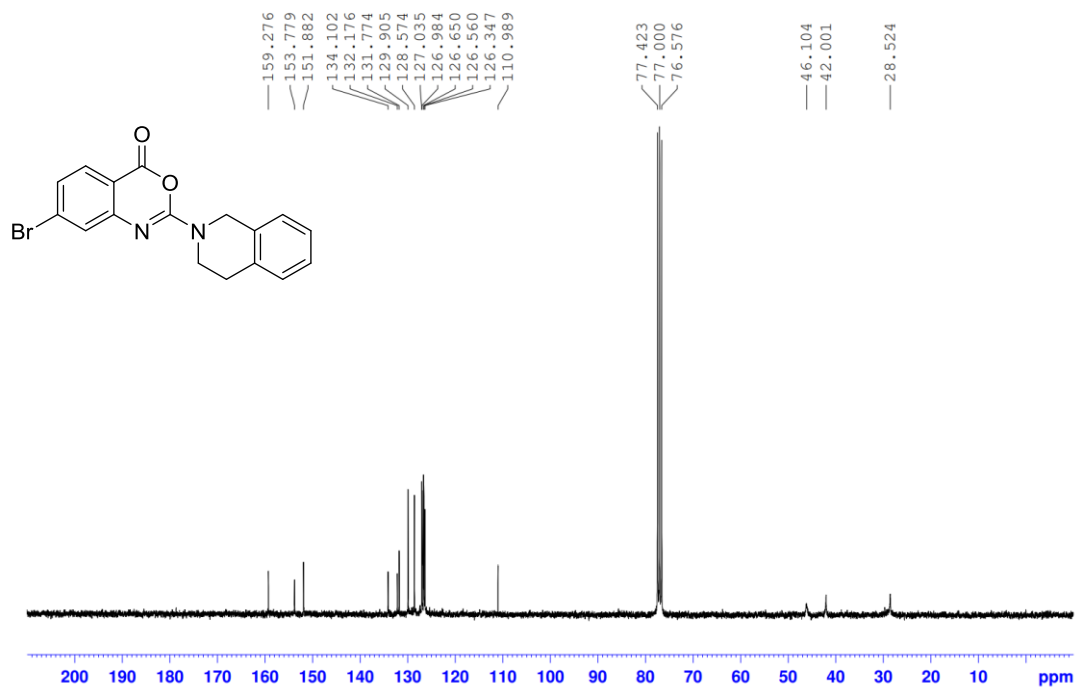

Figure S-30 <sup>13</sup>C NMR spectrum of compound **4o** (75 MHz, CDCl<sub>3</sub>)

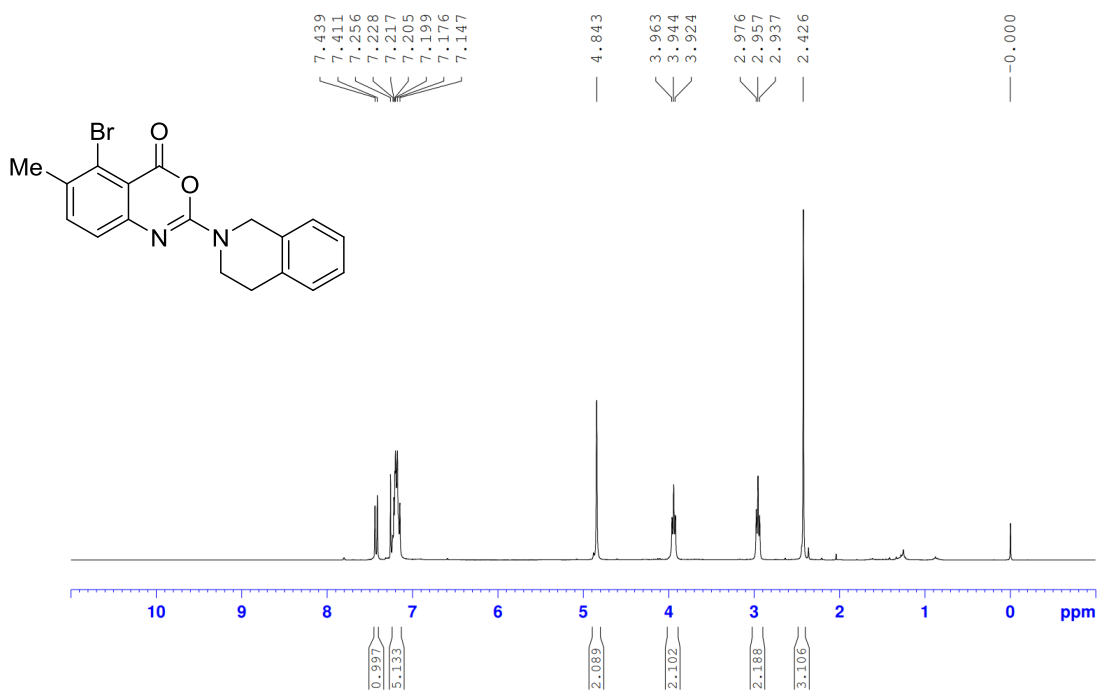

**Figure S-31**  $^1\text{H}$  NMR spectrum of compound **4p** (300 MHz,  $\text{CDCl}_3$ )

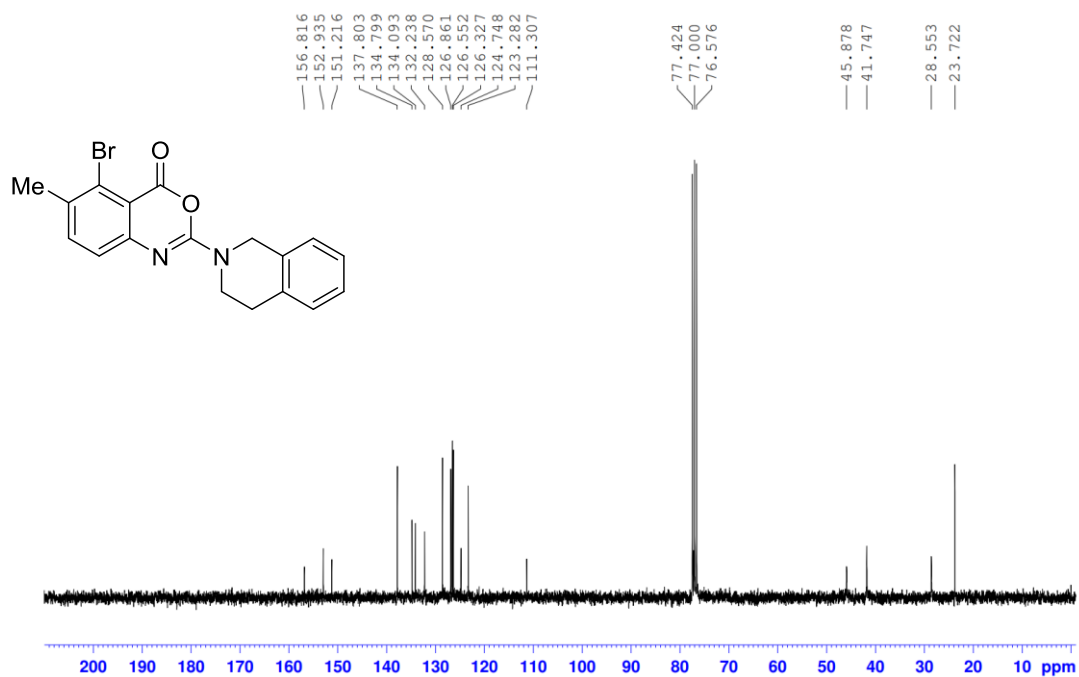

**Figure S-32**  $^{13}\text{C}$  NMR spectrum of compound **4p** (75 MHz,  $\text{CDCl}_3$ )

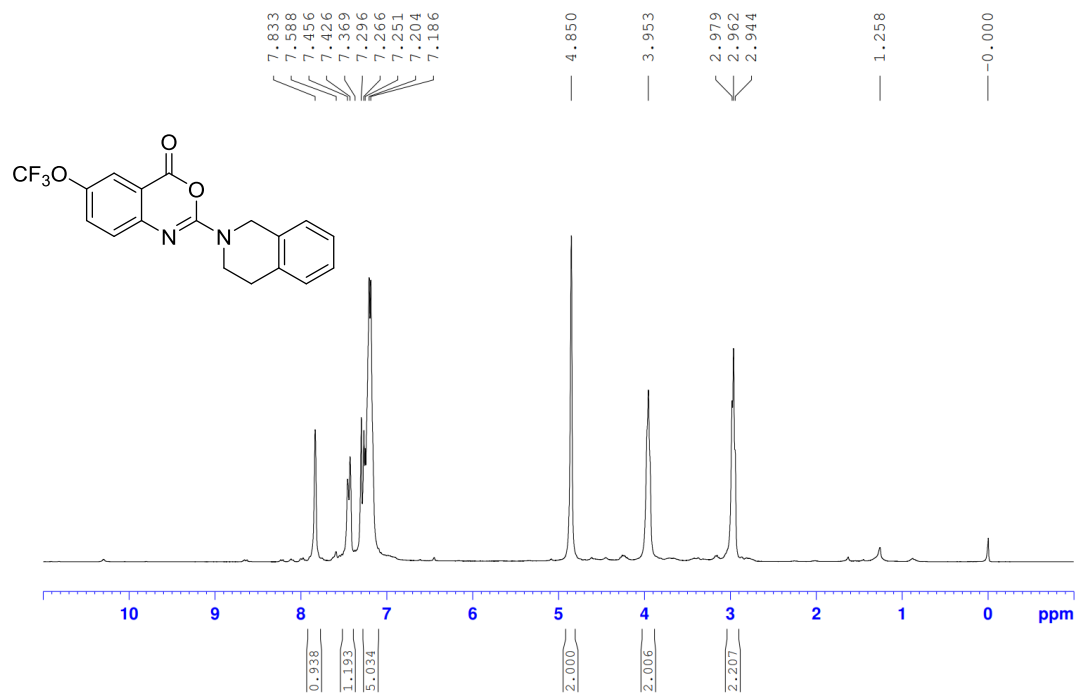

**Figure S-33**  $^1\text{H}$  NMR spectrum of compound **4q** (300 MHz,  $\text{CDCl}_3$ )

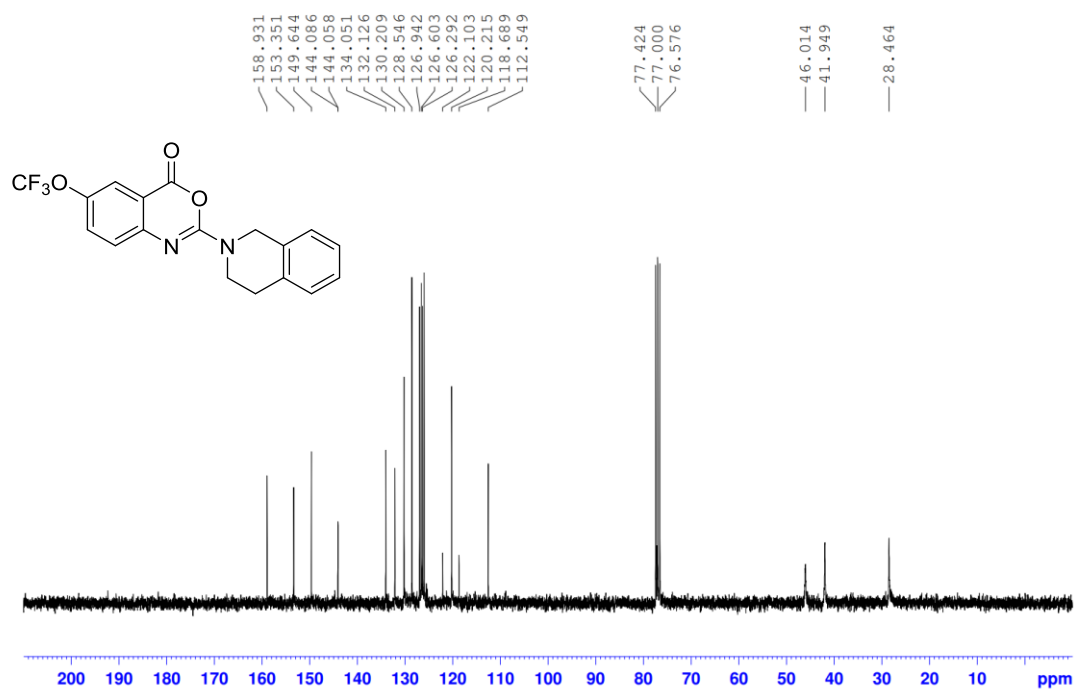

**Figure S-34**  $^{13}\text{C}$  NMR spectrum of compound **4q** (75 MHz,  $\text{CDCl}_3$ )

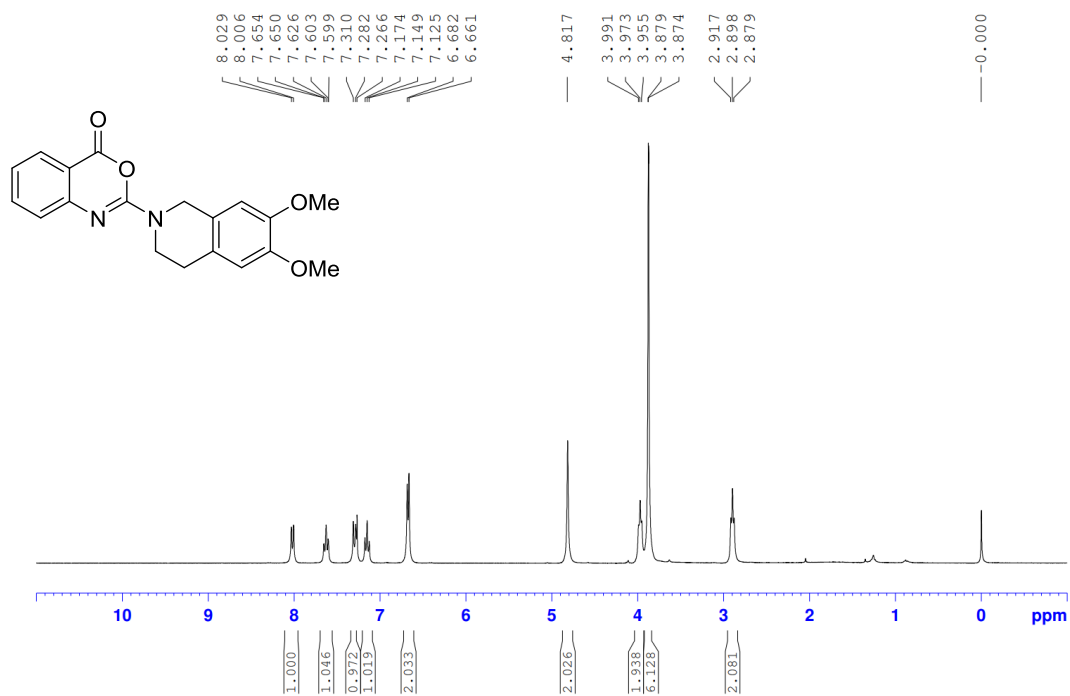

**Figure S-35**  $^1\text{H}$  NMR spectrum of compound **4s** (300 MHz,  $\text{CDCl}_3$ )

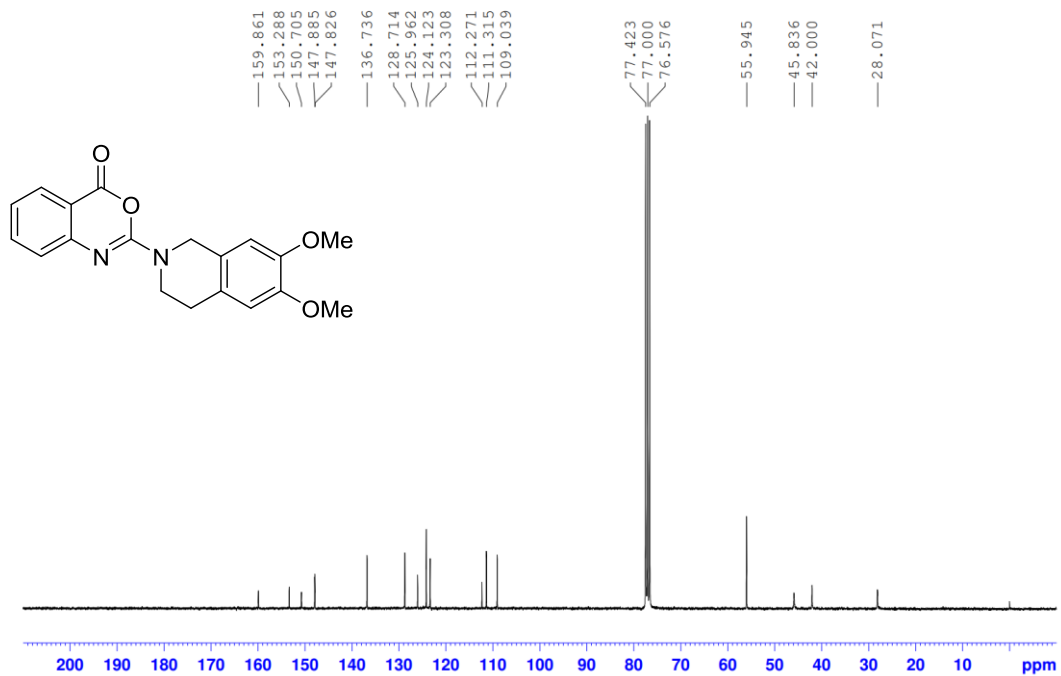

**Figure S-36**  $^{13}\text{C}$  NMR spectrum of compound **4s** (75 MHz,  $\text{CDCl}_3$ )



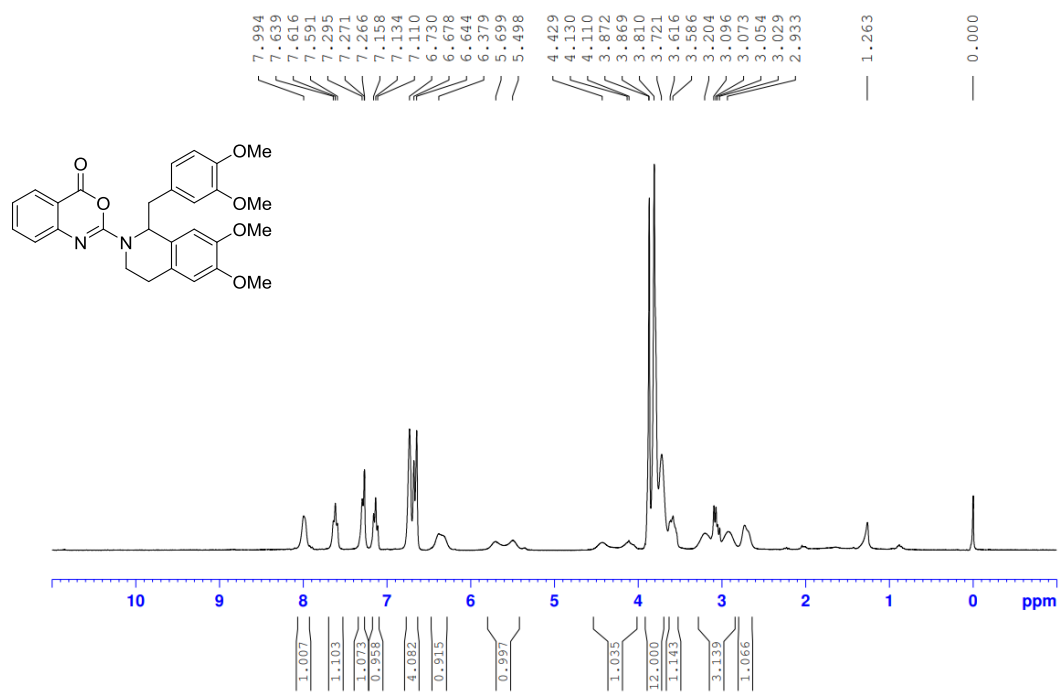

**Figure S-37**  $^1\text{H}$  NMR spectrum of compound **4t** (300 MHz,  $\text{CDCl}_3$ )

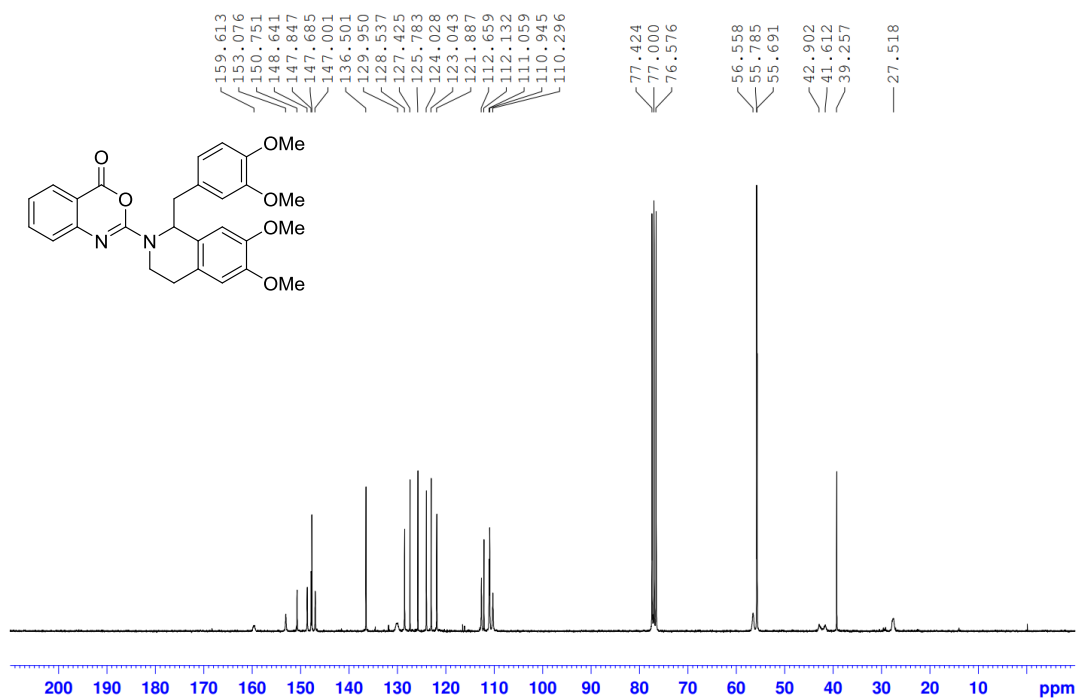

**Figure S-38**  $^{13}\text{C}$  NMR spectrum of compound **4t** (75 MHz,  $\text{CDCl}_3$ )

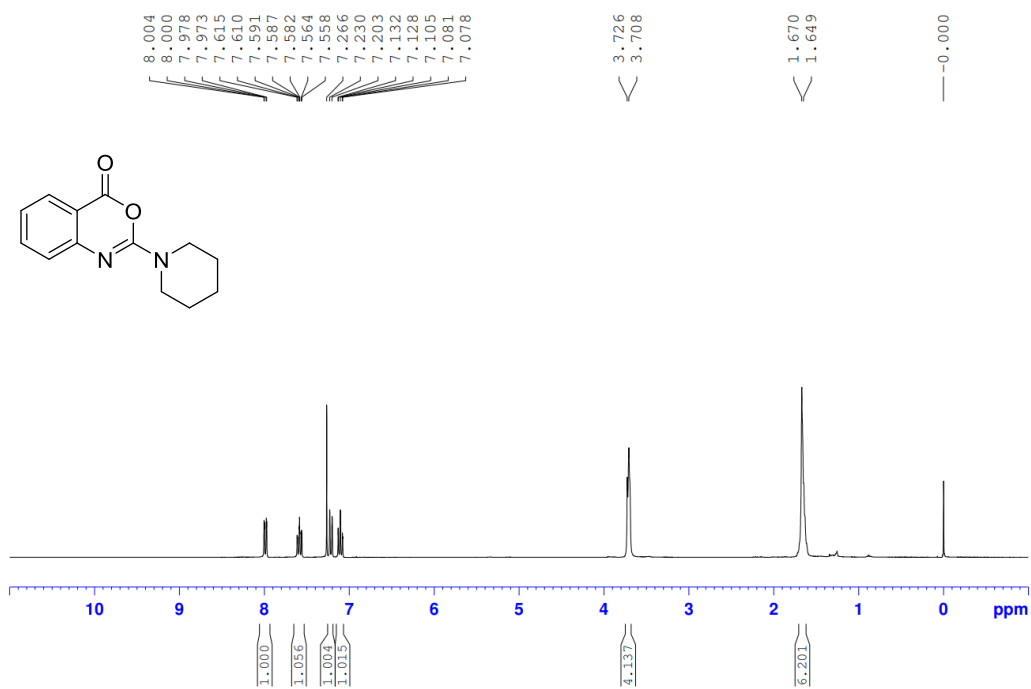

**Figure S-39**  $^1\text{H}$  NMR spectrum of compound **5a** (300 MHz,  $\text{CDCl}_3$ )

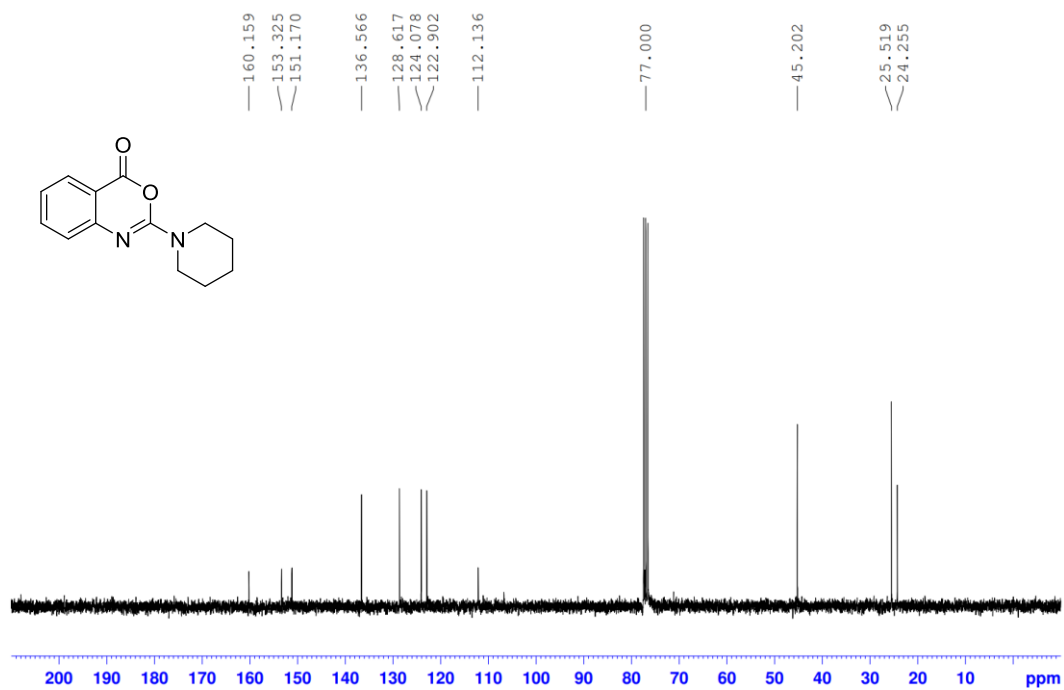

**Figure S-40**  $^{13}\text{C}$  NMR spectrum of compound **5a** (75 MHz,  $\text{CDCl}_3$ )

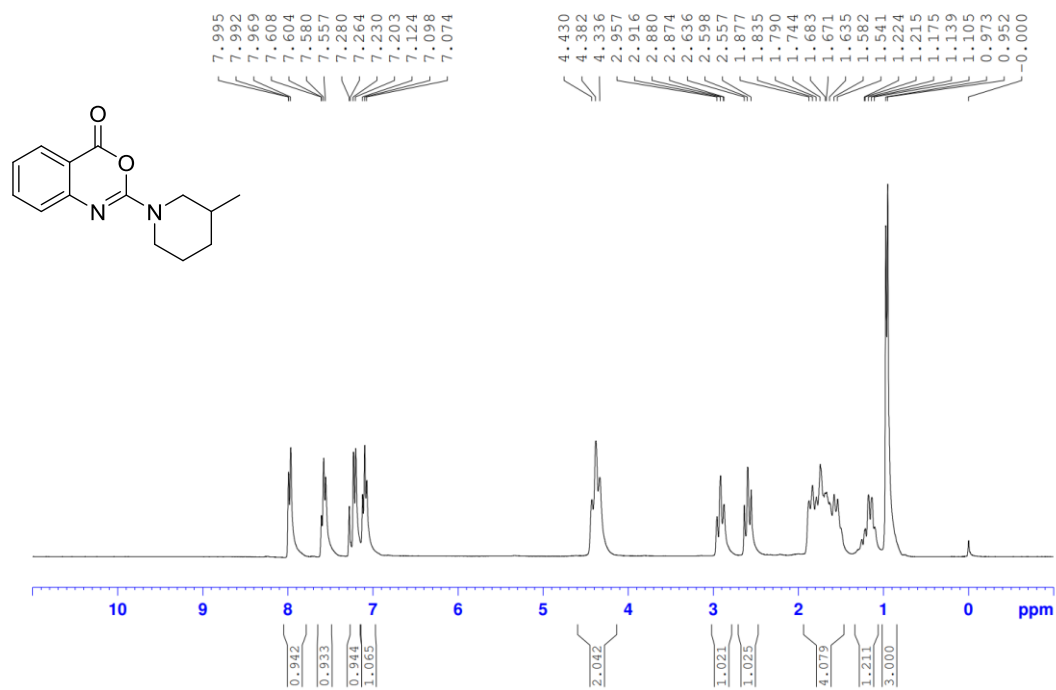

**Figure S-41** <sup>1</sup>H NMR spectrum of compound **5b** (300 MHz, CDCl<sub>3</sub>)

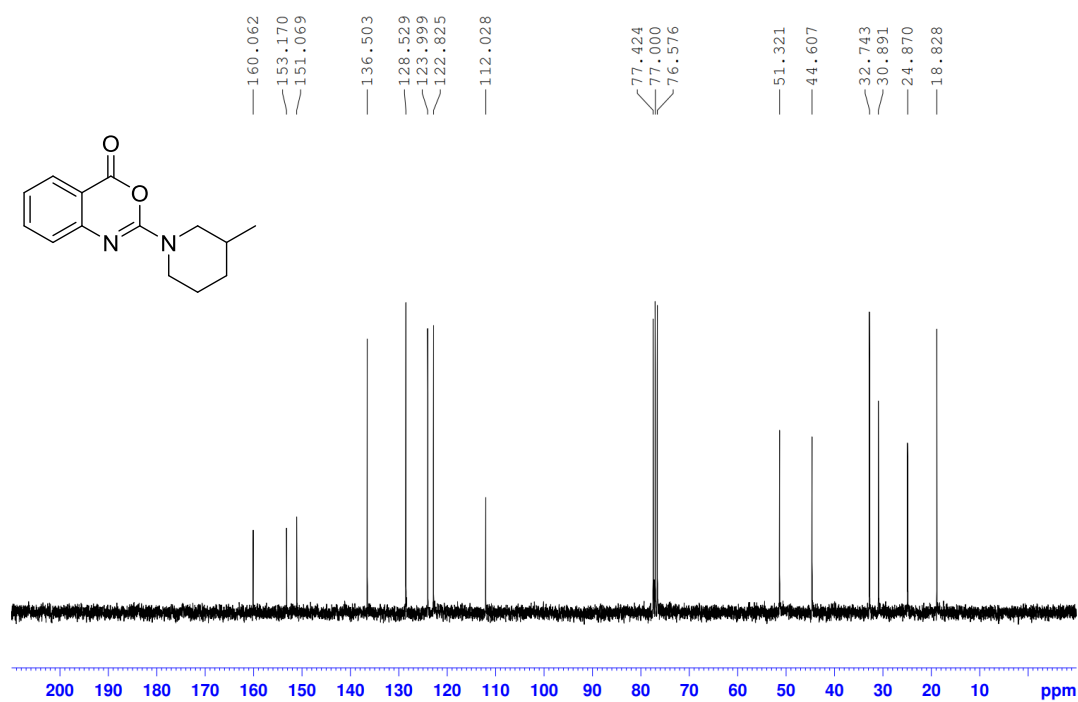

**Figure S-42** <sup>13</sup>C NMR spectrum of compound **5b** (75 MHz, CDCl<sub>3</sub>)

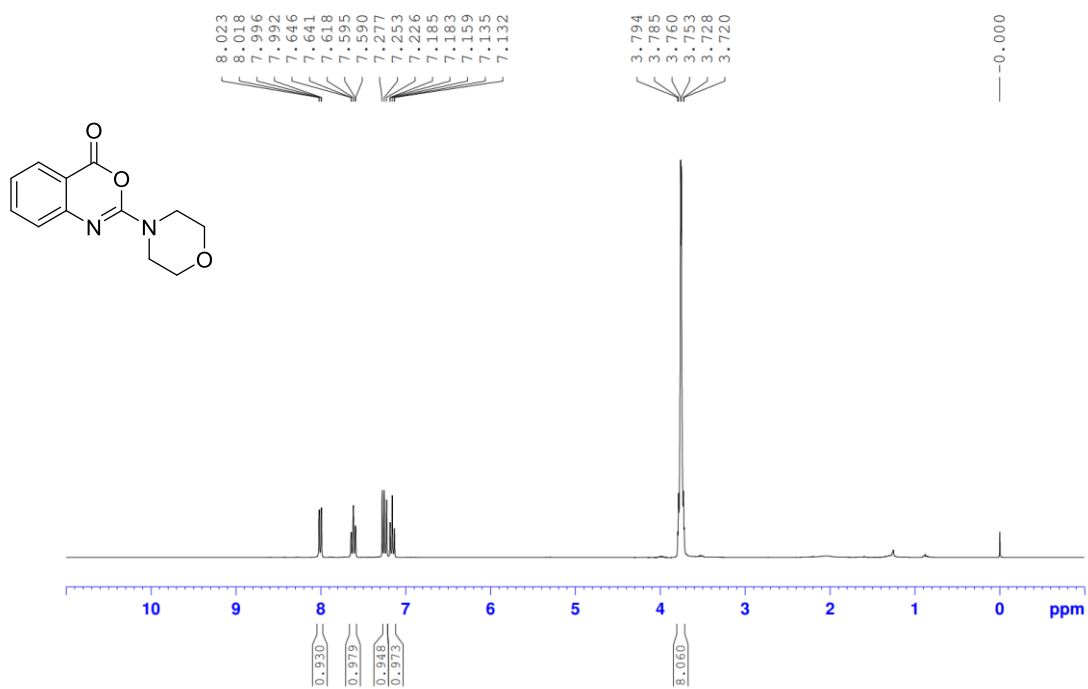

**Figure S-43** <sup>1</sup>H NMR spectrum of compound **5c** (300 MHz, CDCl<sub>3</sub>)

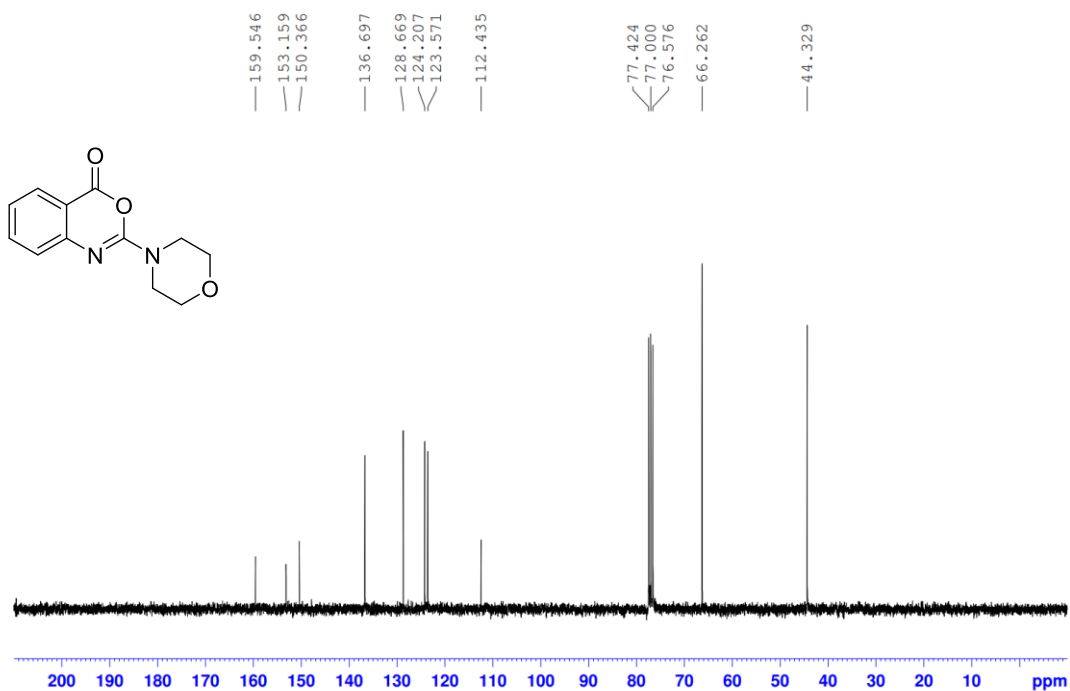

**Figure S-44** <sup>13</sup>C NMR spectrum of compound **5c** (75 MHz, CDCl<sub>3</sub>)

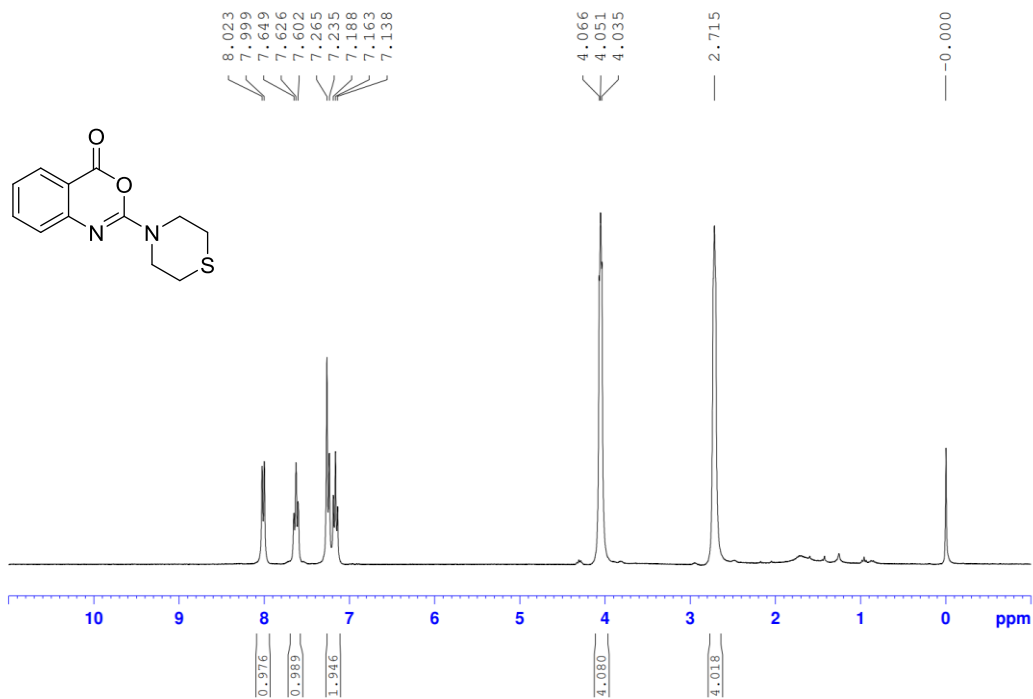

**Figure S-45**  $^1\text{H}$  NMR spectrum of compound **5d** (300 MHz,  $\text{CDCl}_3$ )

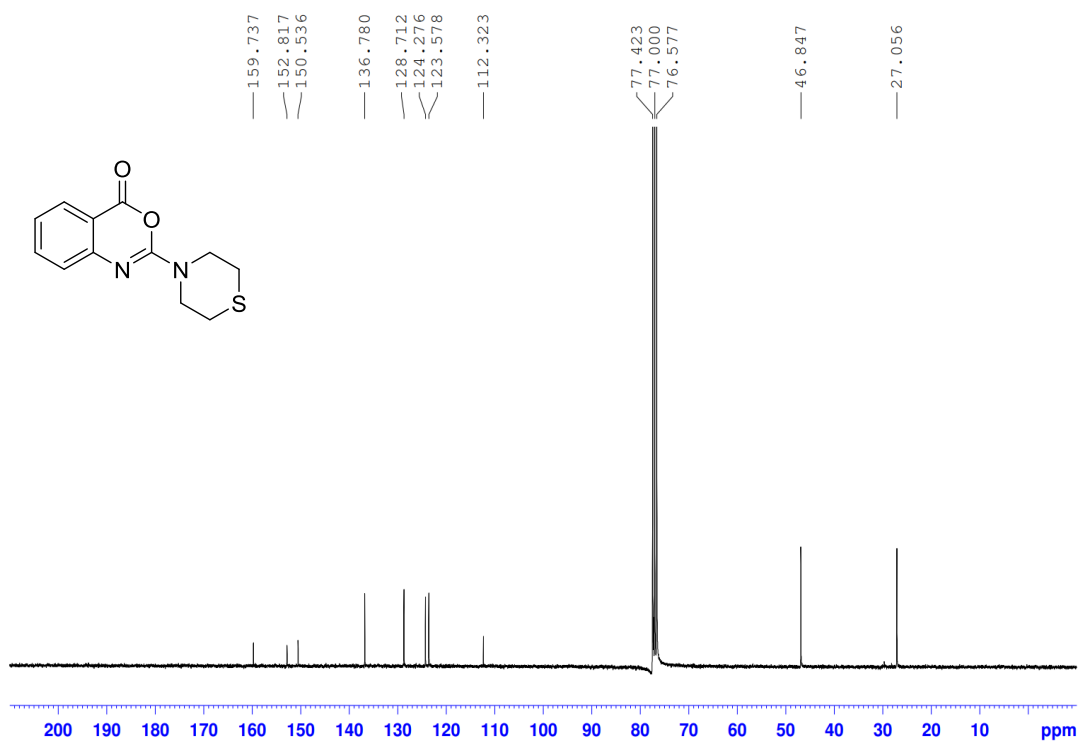

**Figure S-46**  $^{13}\text{C}$  NMR spectrum of compound **5d** (75 MHz,  $\text{CDCl}_3$ )

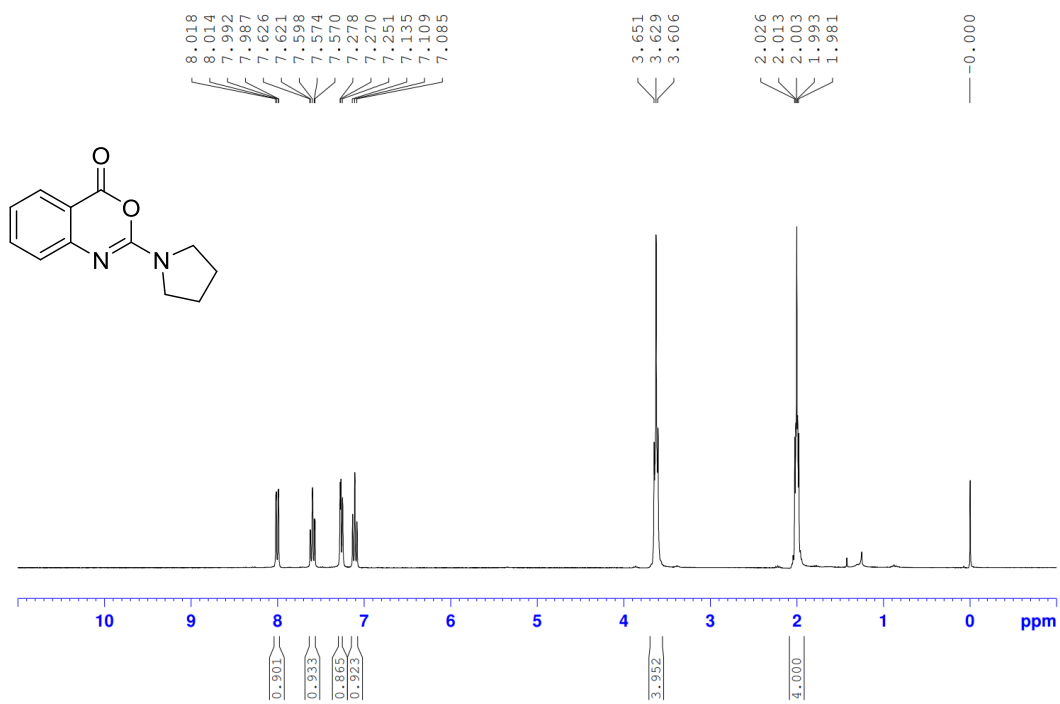

**Figure S-47** <sup>1</sup>H NMR spectrum of compound **5f** (300 MHz, CDCl<sub>3</sub>)

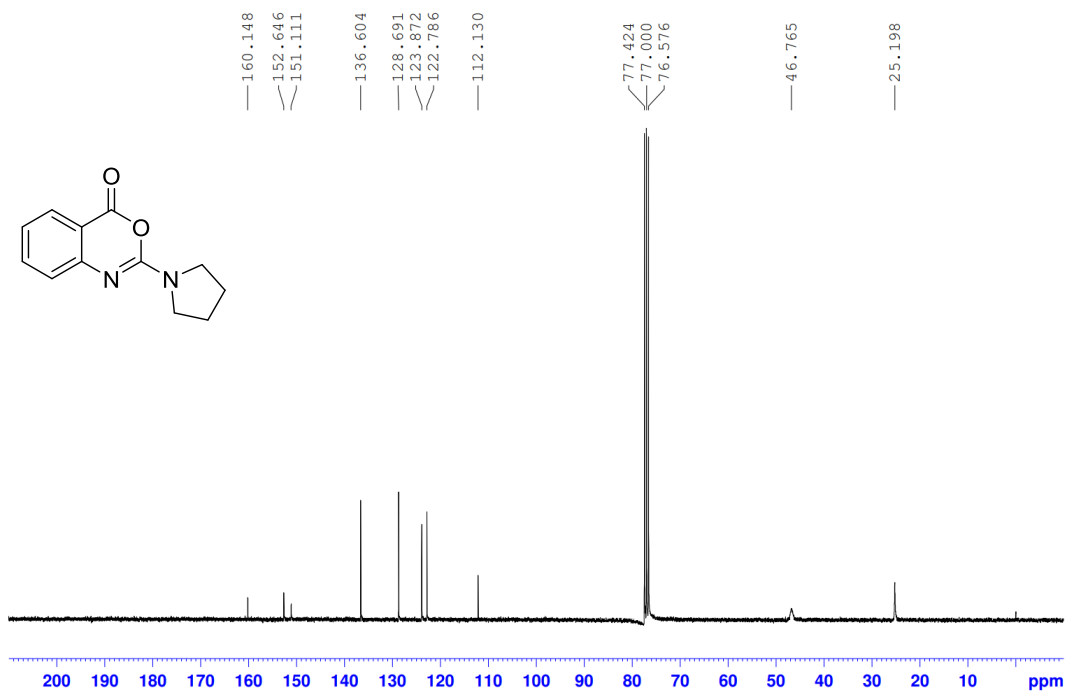

**Figure S-48** <sup>13</sup>C NMR spectrum of compound **5f** (75 MHz, CDCl<sub>3</sub>)

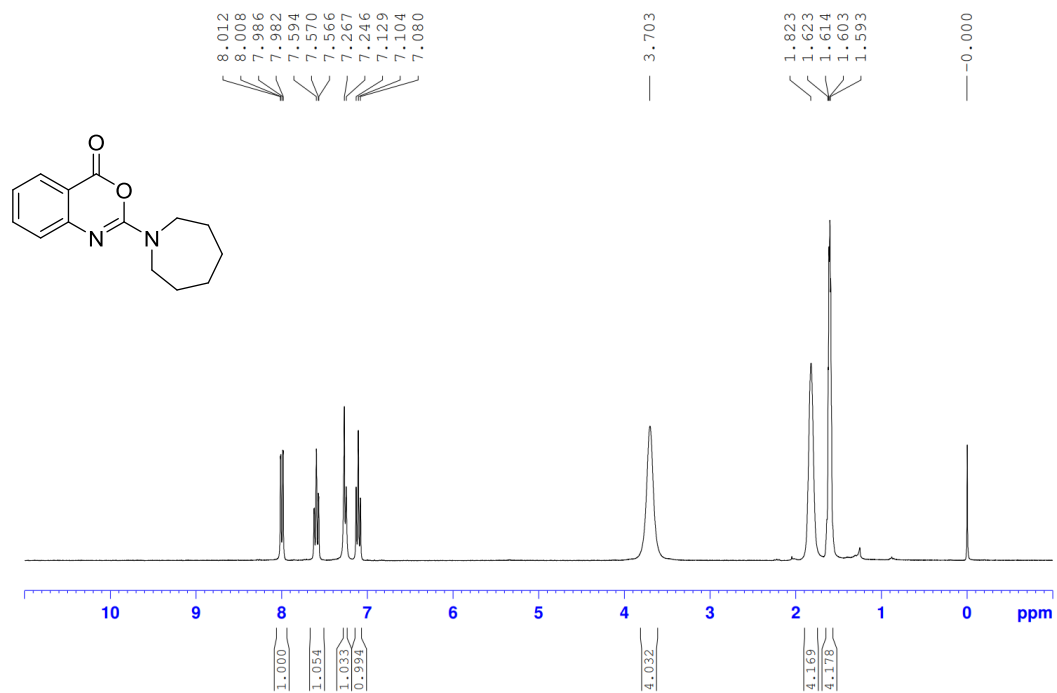

**Figure S-49** <sup>1</sup>H NMR spectrum of compound **5g** (300 MHz, CDCl<sub>3</sub>)

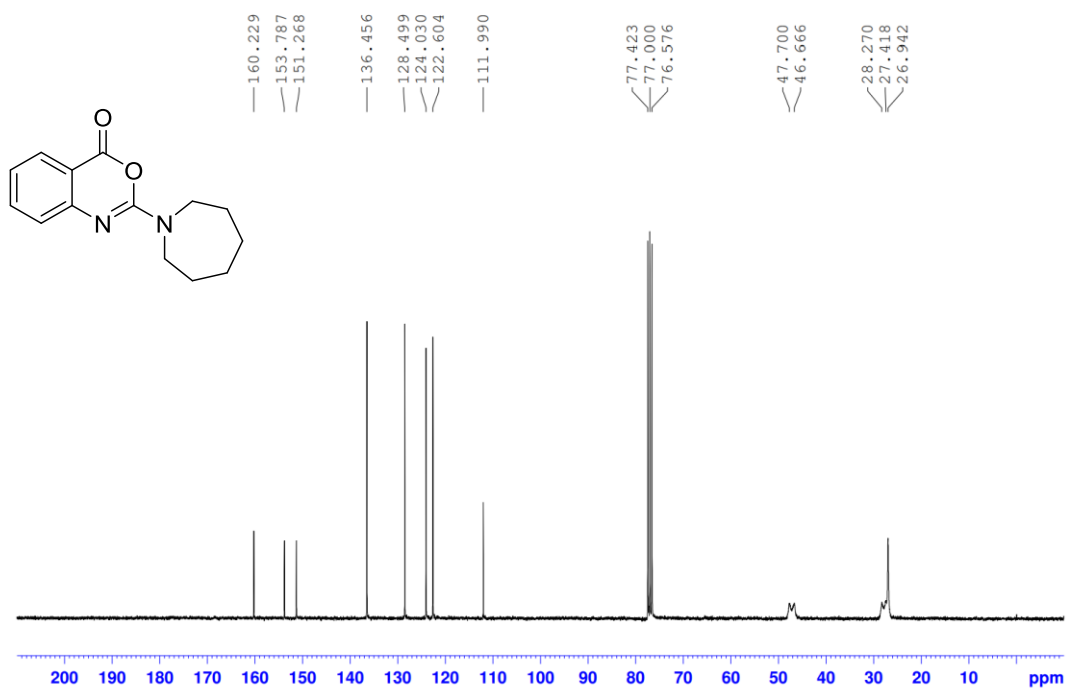

**Figure S-50** <sup>13</sup>C NMR spectrum of compound **5g** (75 MHz, CDCl<sub>3</sub>)

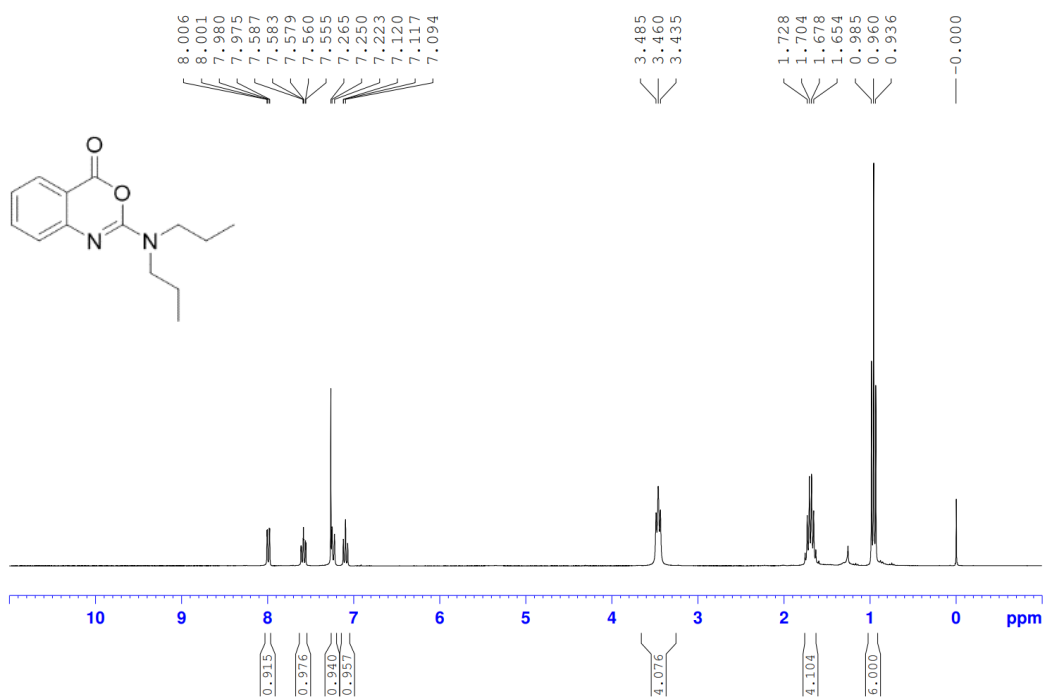

**Figure S-51** <sup>1</sup>H NMR spectrum of compound **5h** (300 MHz, CDCl<sub>3</sub>)

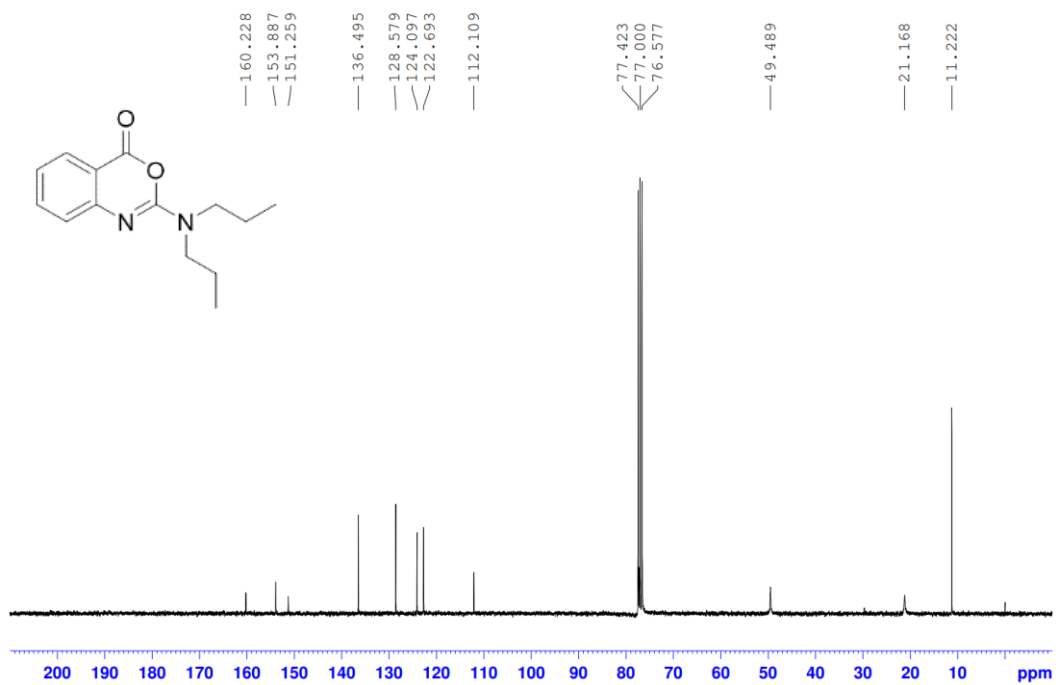

**Figure S-52** <sup>13</sup>C NMR spectrum of compound **5h** (75 MHz, CDCl<sub>3</sub>)



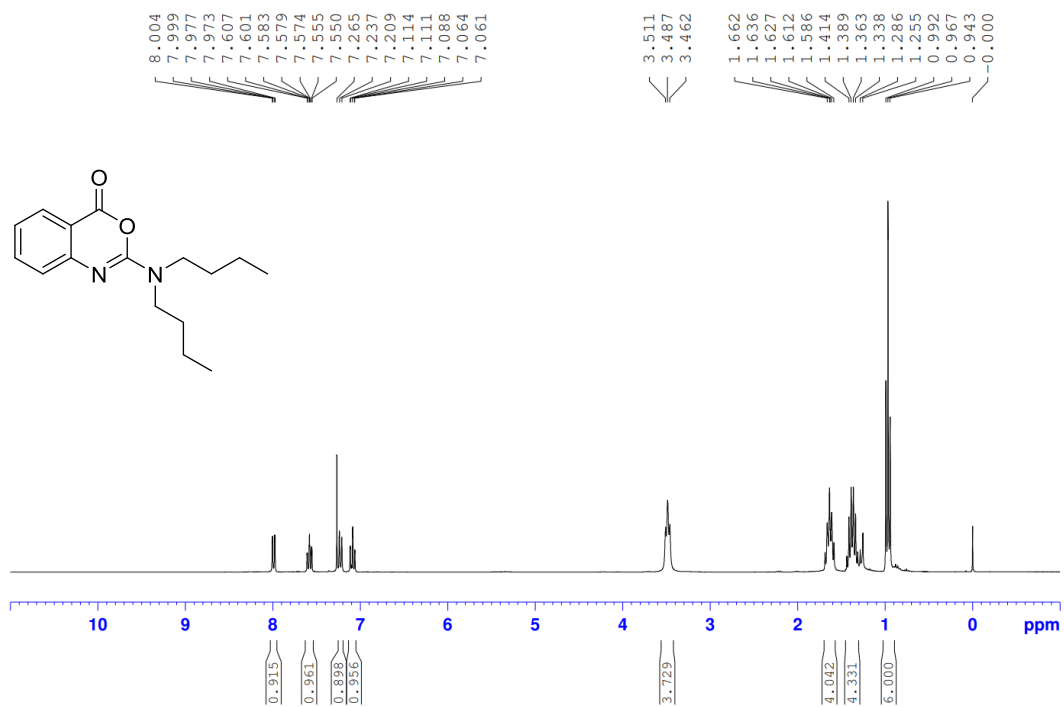

**Figure S-53** <sup>1</sup>H NMR spectrum of compound **5i** (300 MHz, CDCl<sub>3</sub>)

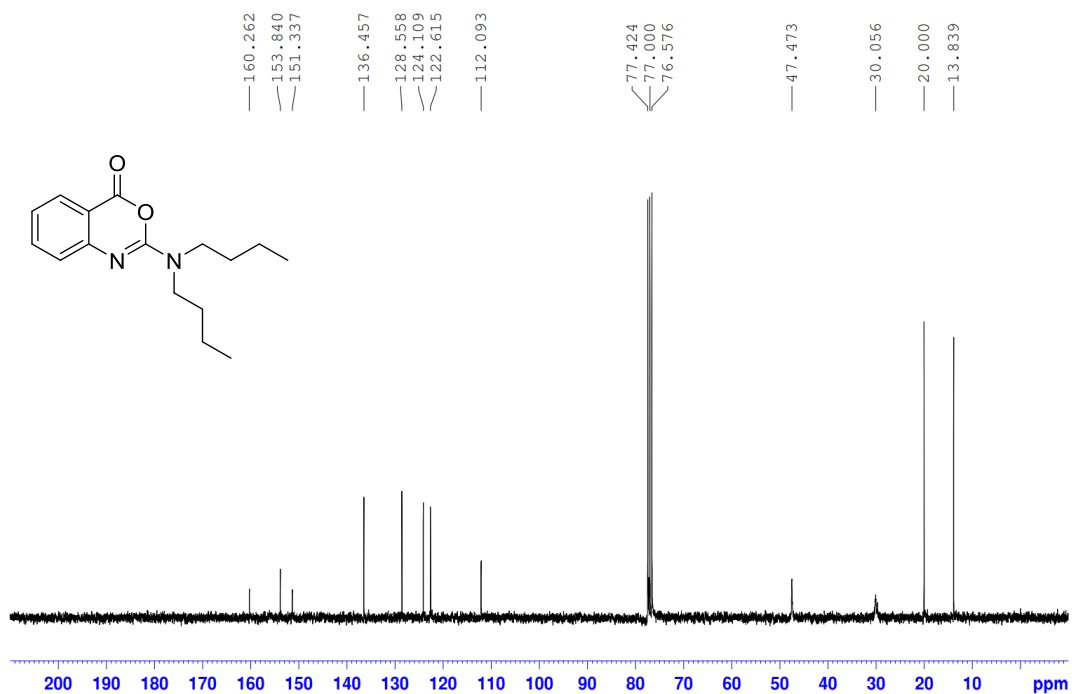

**Figure S-54** <sup>13</sup>C NMR spectrum of compound **5i** (75 MHz, CDCl<sub>3</sub>)

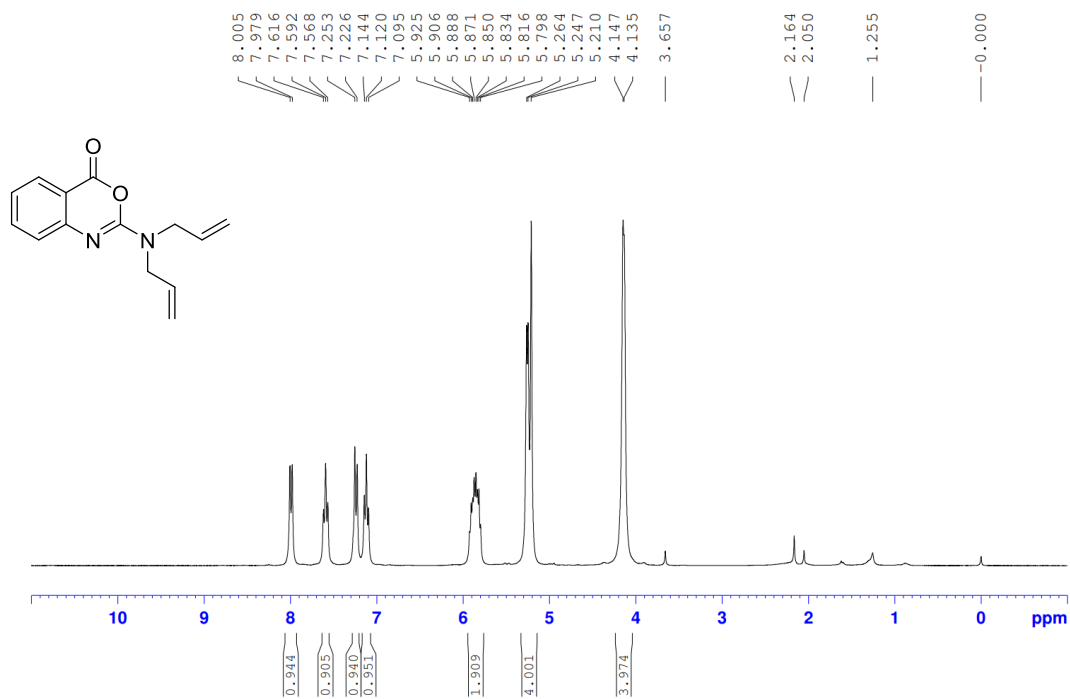

**Figure S-55** <sup>1</sup>H NMR spectrum of compound **5j** (300 MHz, CDCl<sub>3</sub>)

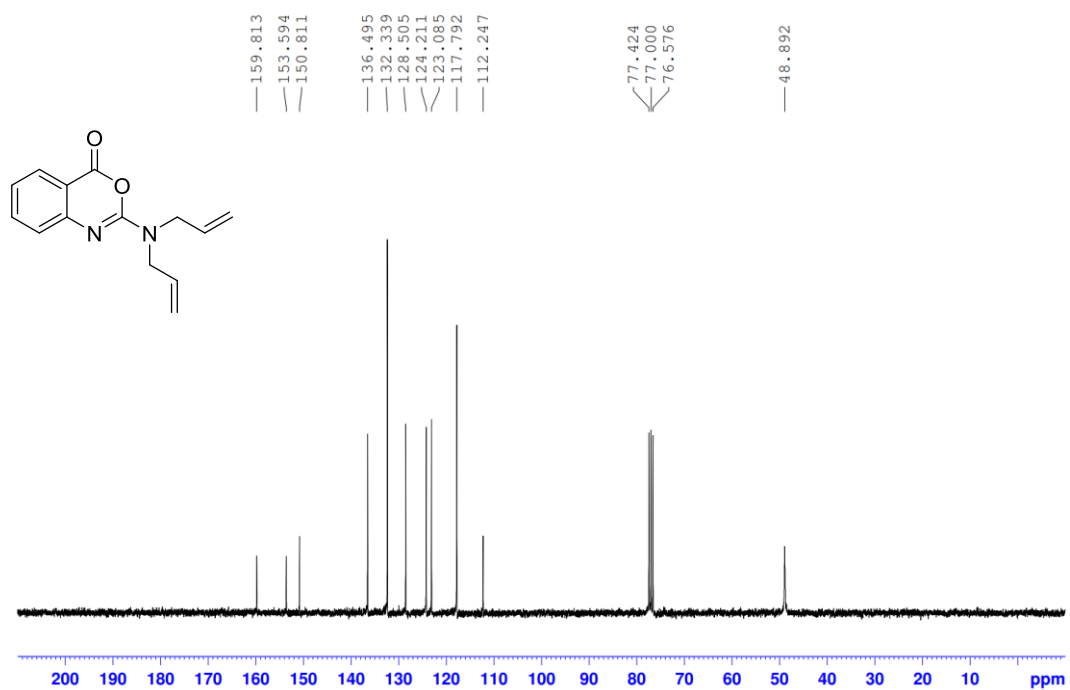

**Figure S-56** <sup>13</sup>C NMR spectrum of compound **5j** (75 MHz, CDCl<sub>3</sub>)

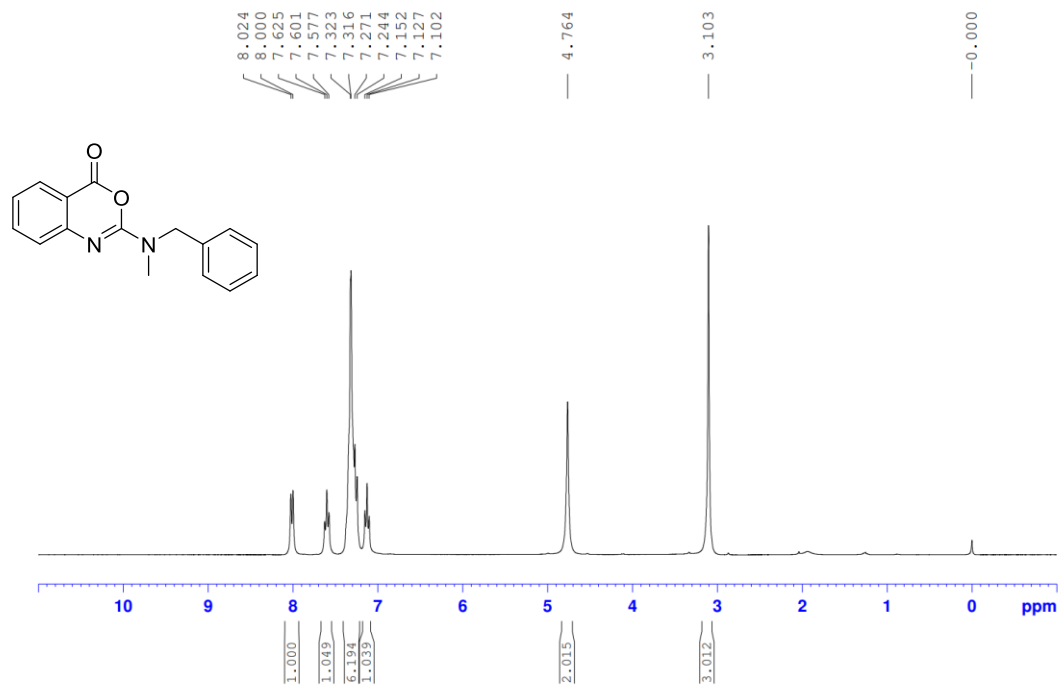

**Figure S-57**  $^1\text{H NMR}$  spectrum of compound **5k** (300 MHz,  $\text{CDCl}_3$ )

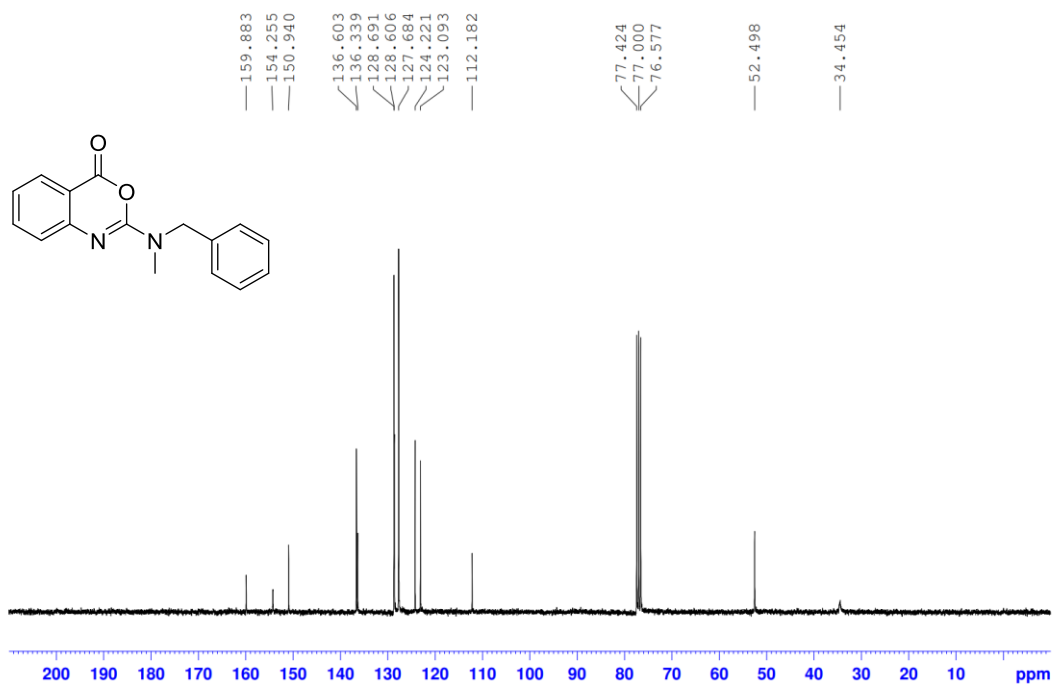

**Figure S-58**  $^{13}\text{C NMR}$  spectrum of compound **5k** (75 MHz,  $\text{CDCl}_3$ )

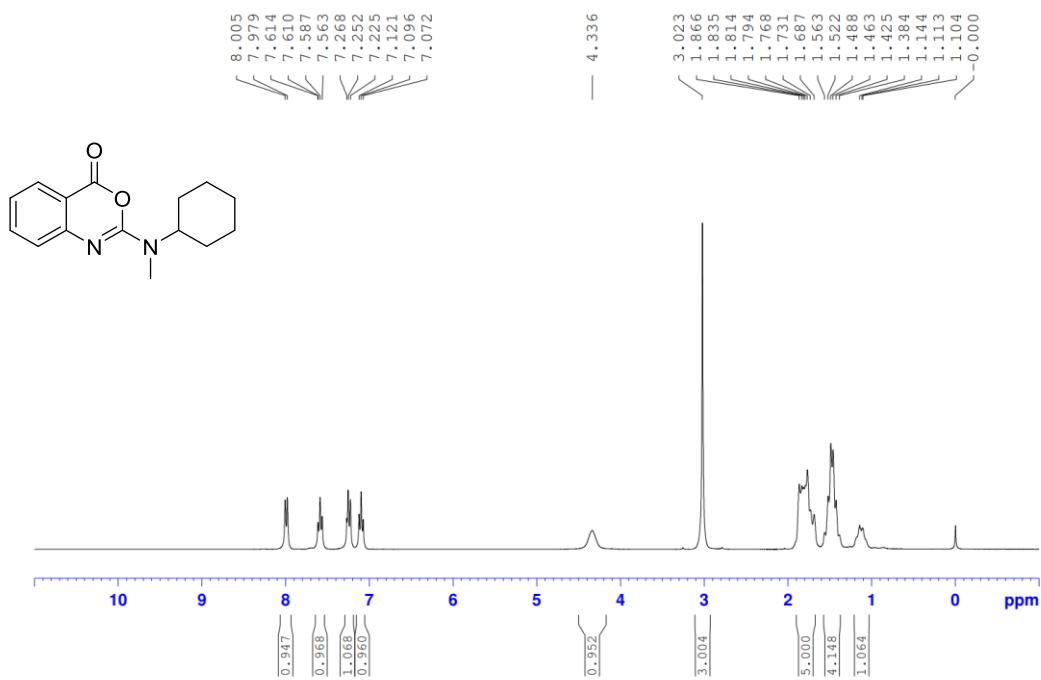

**Figure S-59**  $^1\text{H}$  NMR spectrum of compound **51** (300 MHz,  $\text{CDCl}_3$ )

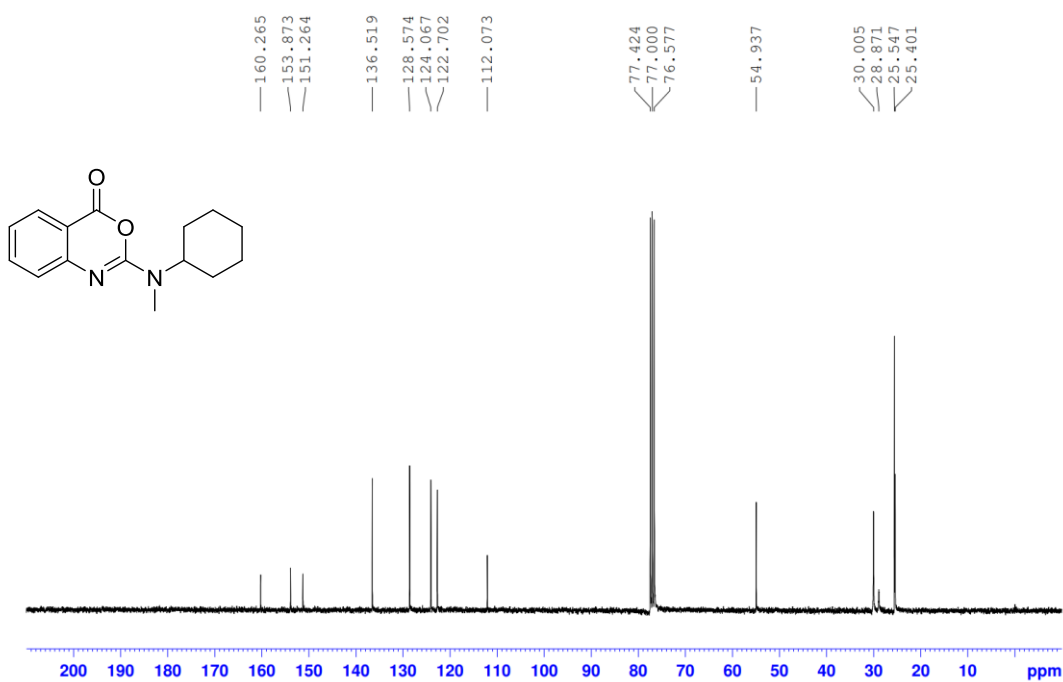

**Figure S-60**  $^{13}\text{C}$  NMR spectrum of compound **51** (75 MHz,  $\text{CDCl}_3$ )

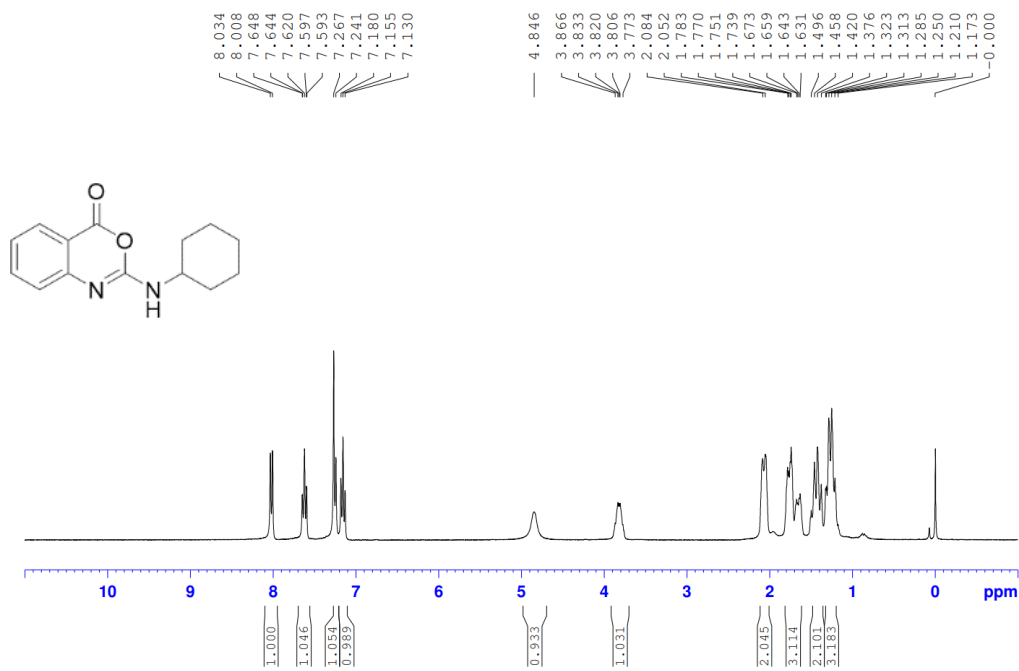

**Figure S-61** <sup>1</sup>H NMR spectrum of compound **5m** (300 MHz, CDCl<sub>3</sub>)

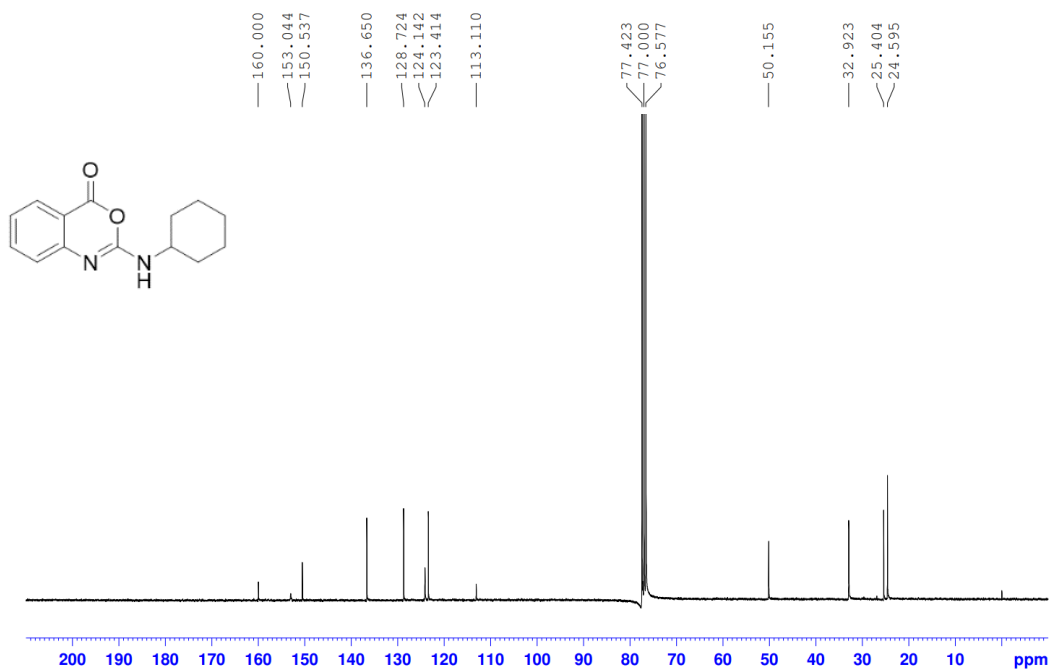

**Figure S-62** <sup>13</sup>C NMR spectrum of compound **5m** (75 MHz, CDCl<sub>3</sub>)

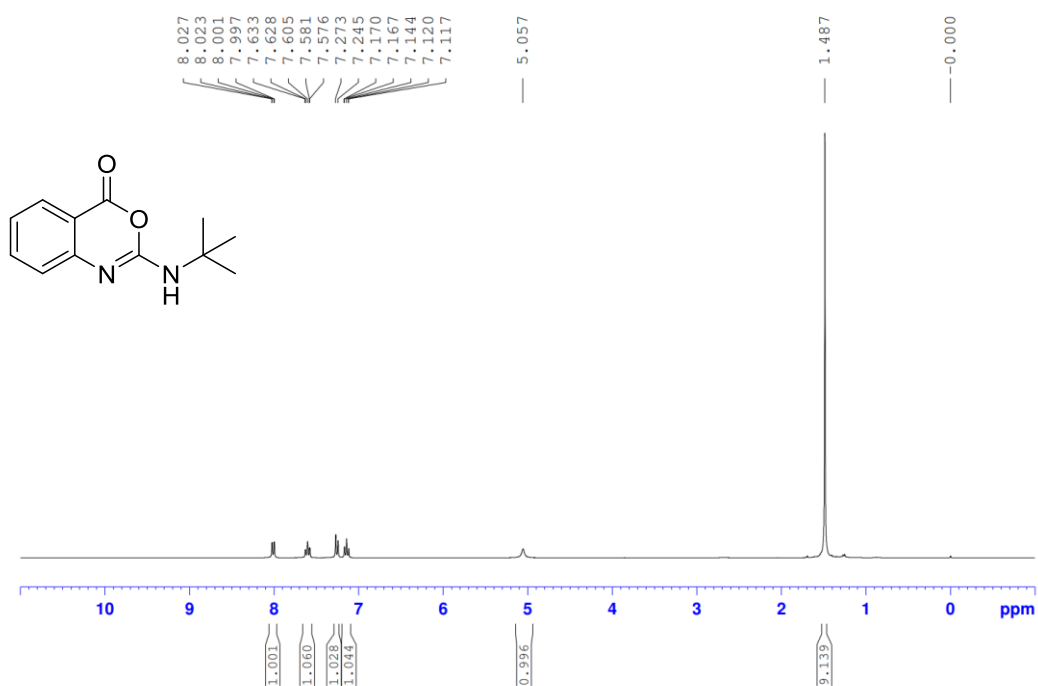

**Figure S-63** <sup>1</sup>H NMR spectrum of compound **5n** (300 MHz, CDCl<sub>3</sub>)

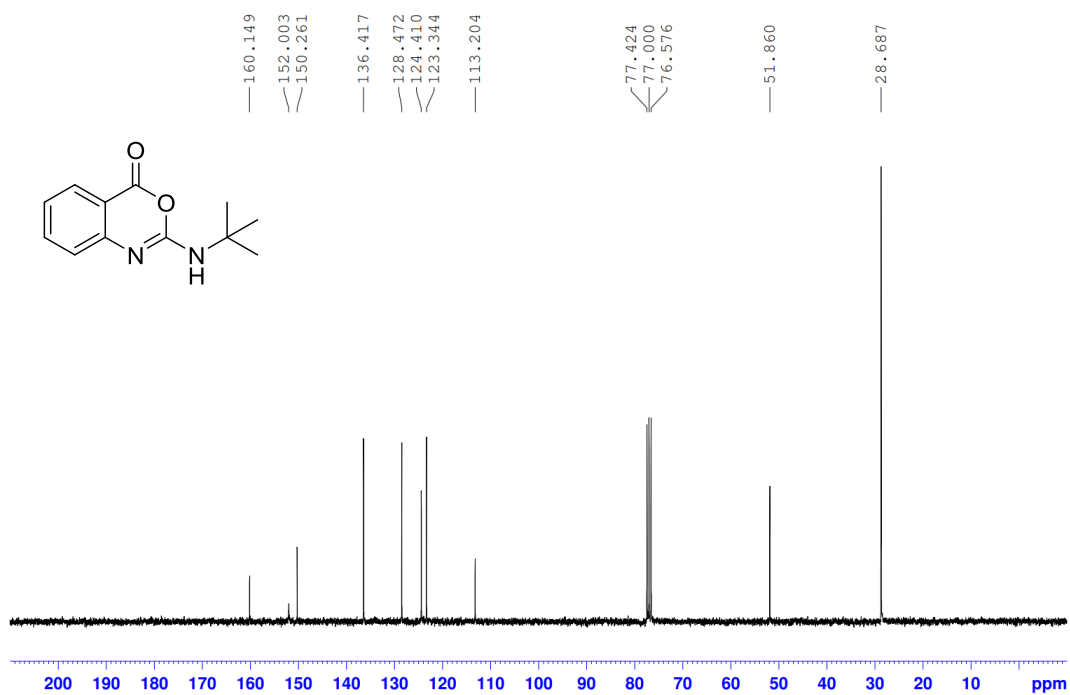

**Figure S-64** <sup>13</sup>C NMR spectrum of compound **5n** (75 MHz, CDCl<sub>3</sub>)

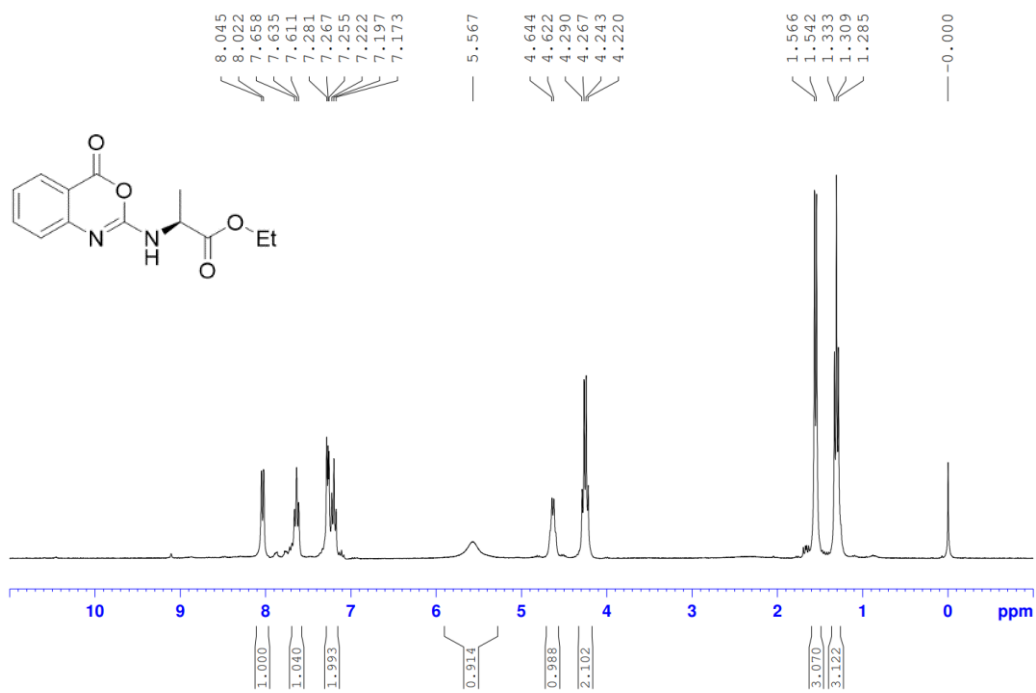

**Figure S-65** <sup>1</sup>H NMR spectrum of compound **5o** (300 MHz, CDCl<sub>3</sub>)

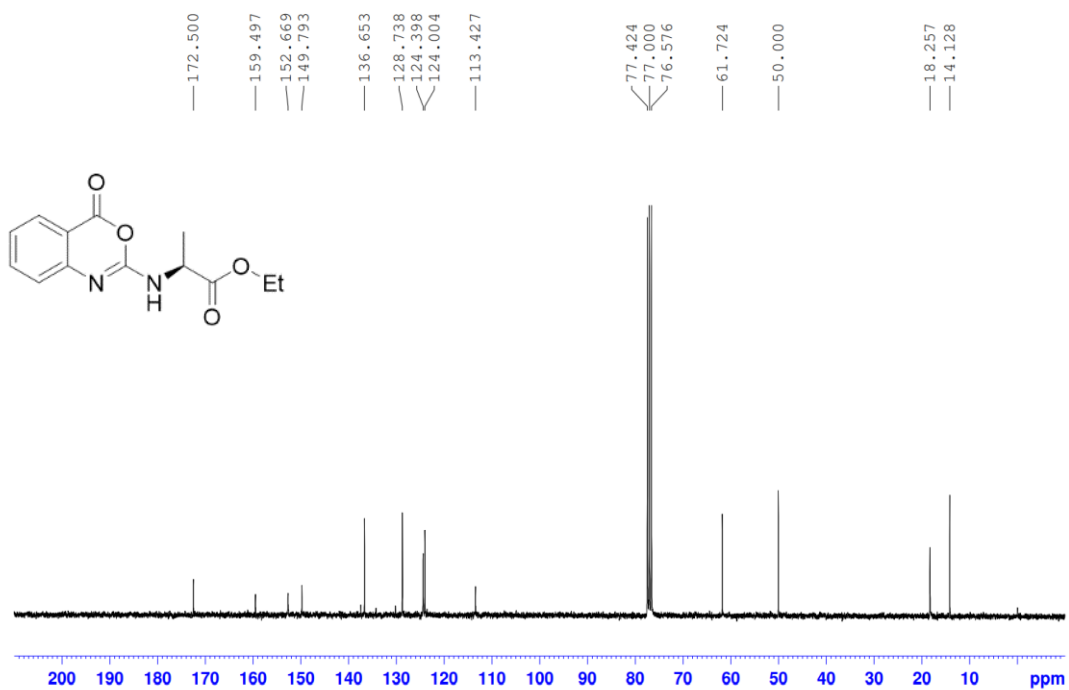

**Figure S-66** <sup>13</sup>C NMR spectrum of compound **5o** (75 MHz, CDCl<sub>3</sub>)

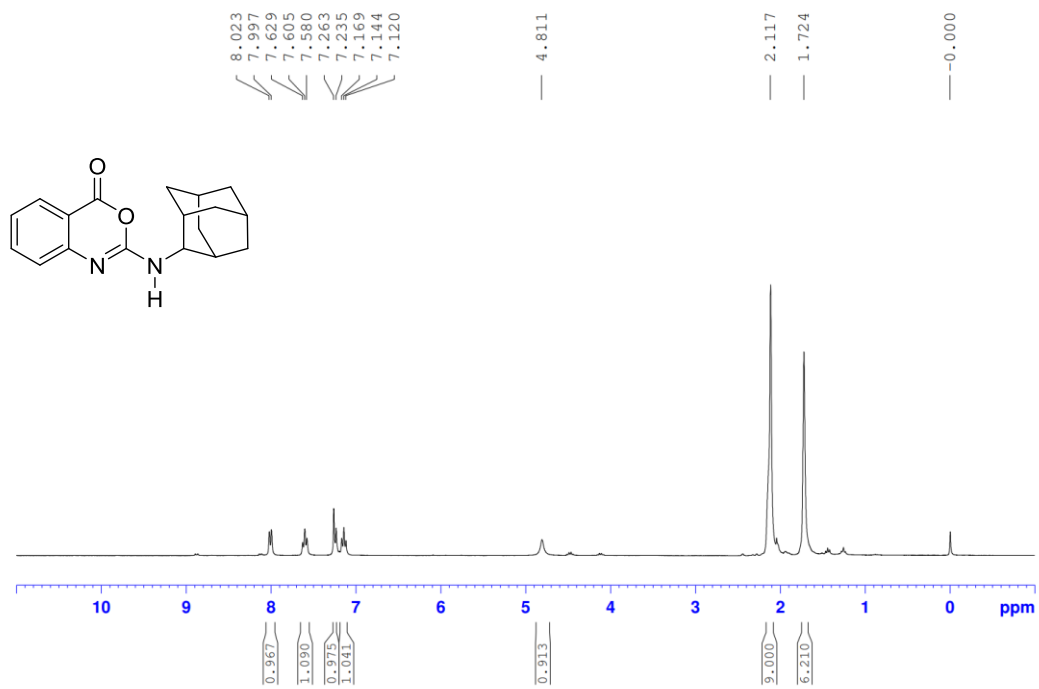

**Figure S-67**  $^1\text{H}$  NMR spectrum of compound **5p** (300 MHz,  $\text{CDCl}_3$ )

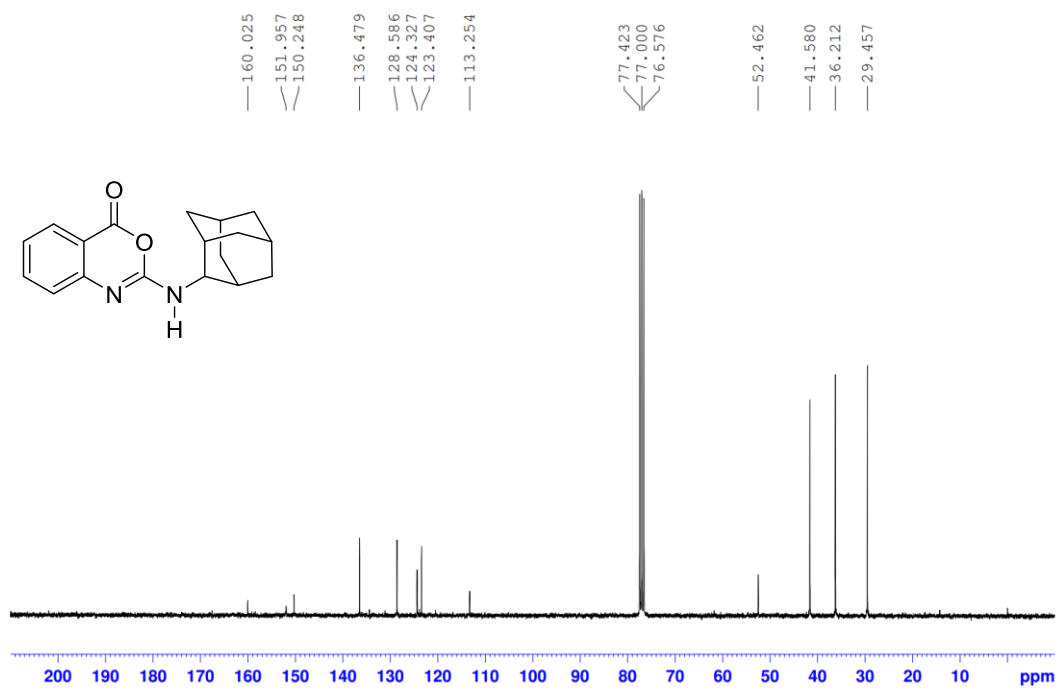

**Figure S-68**  $^{13}\text{C}$  NMR spectrum of compound **5p** (75 MHz,  $\text{CDCl}_3$ )



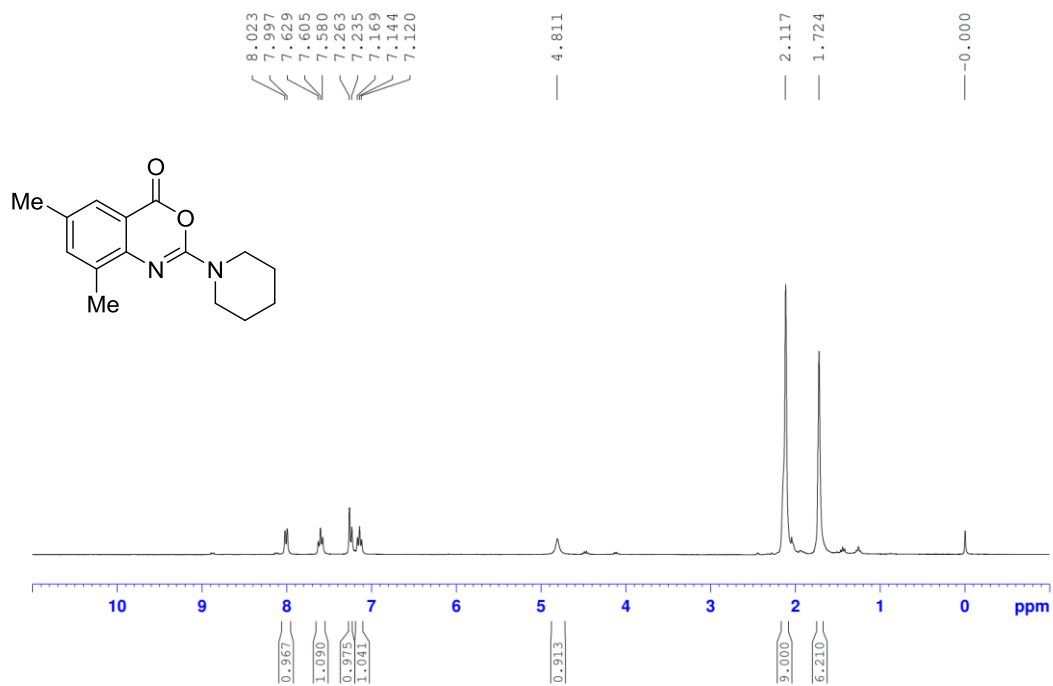

**Figure S-69** <sup>1</sup>H NMR spectrum of compound **5q** (300 MHz, CDCl<sub>3</sub>)

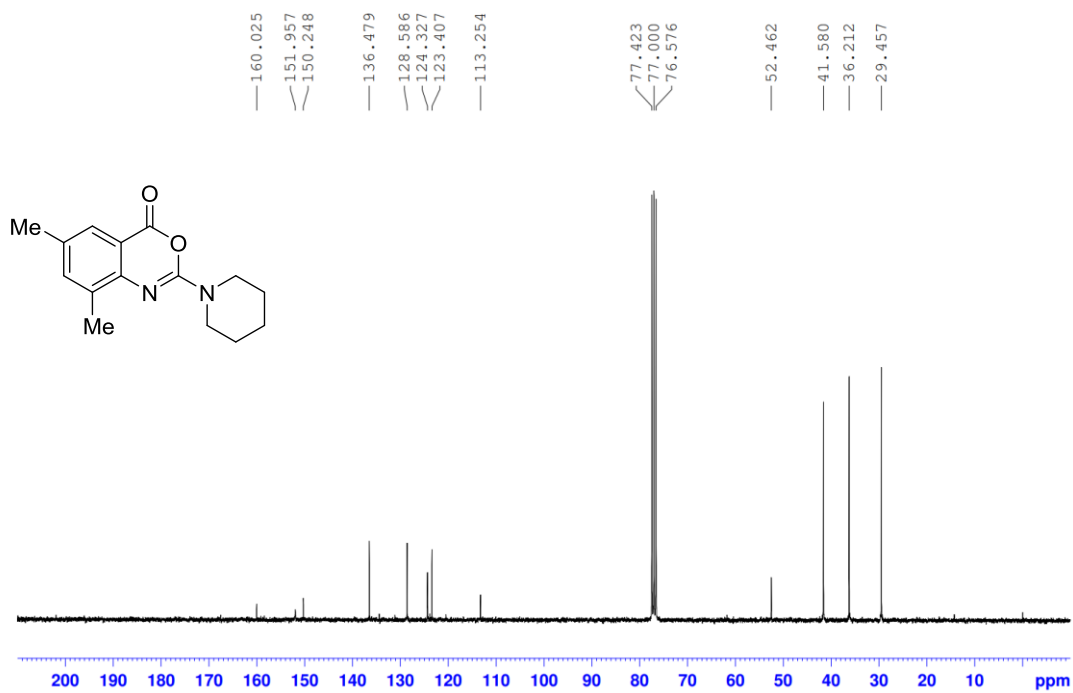

**Figure S-70** <sup>13</sup>C NMR spectrum of compound **5q** (75 MHz, CDCl<sub>3</sub>)

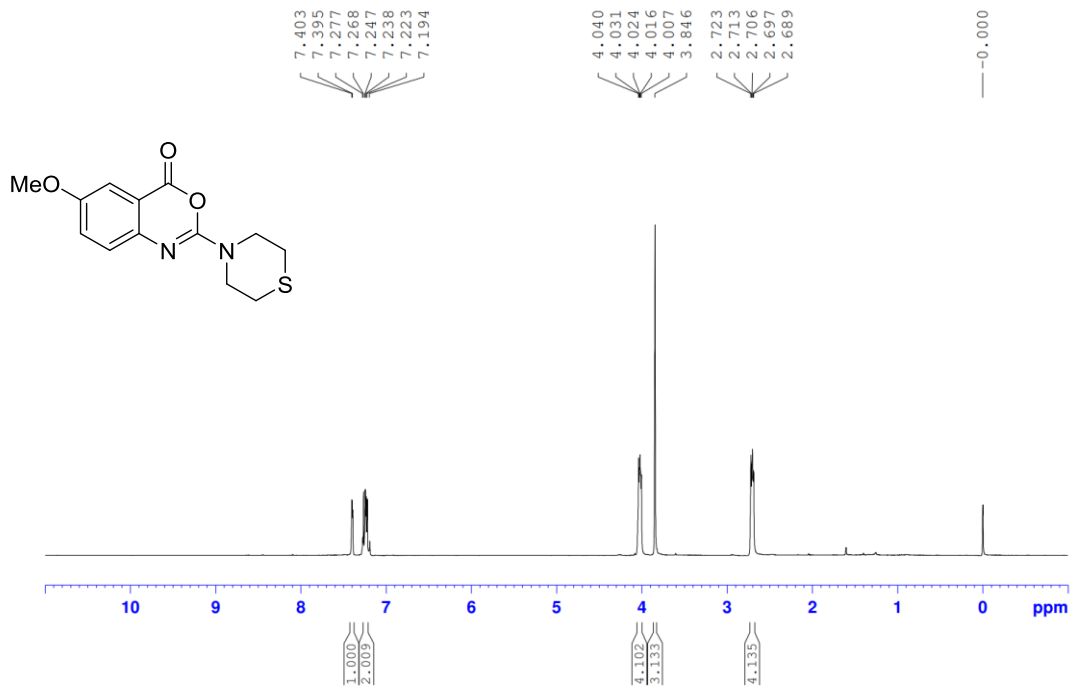

**Figure S-71**  $^1\text{H}$  NMR spectrum of compound **5r** (300 MHz,  $\text{CDCl}_3$ )

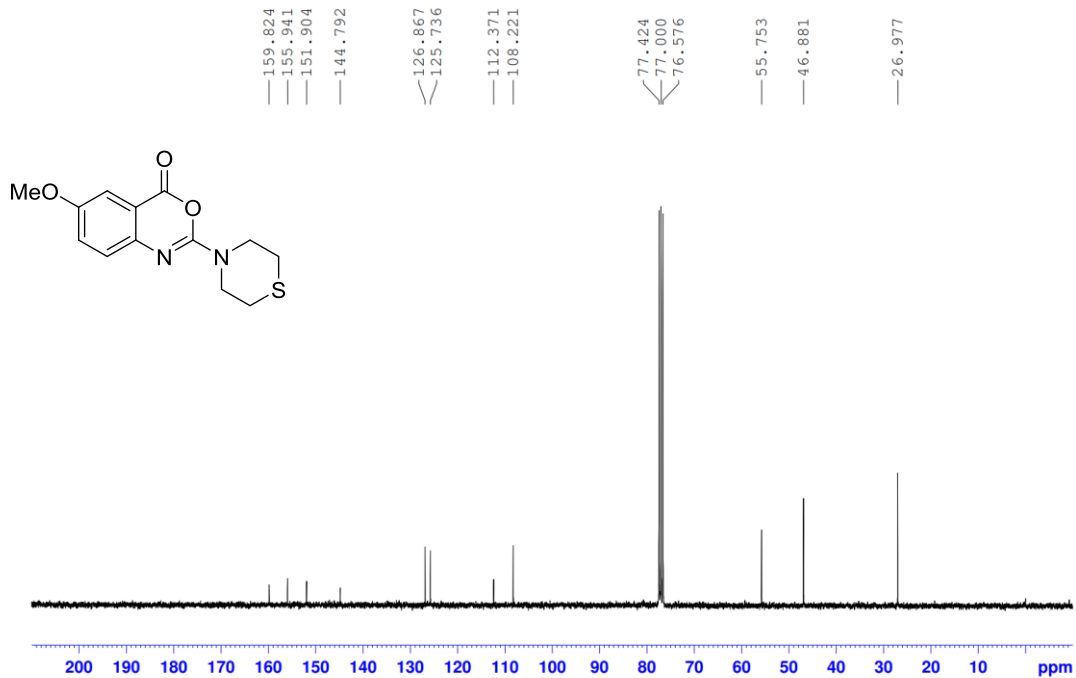

**Figure S-72**  $^{13}\text{C}$  NMR spectrum of compound **5r** (75 MHz,  $\text{CDCl}_3$ )

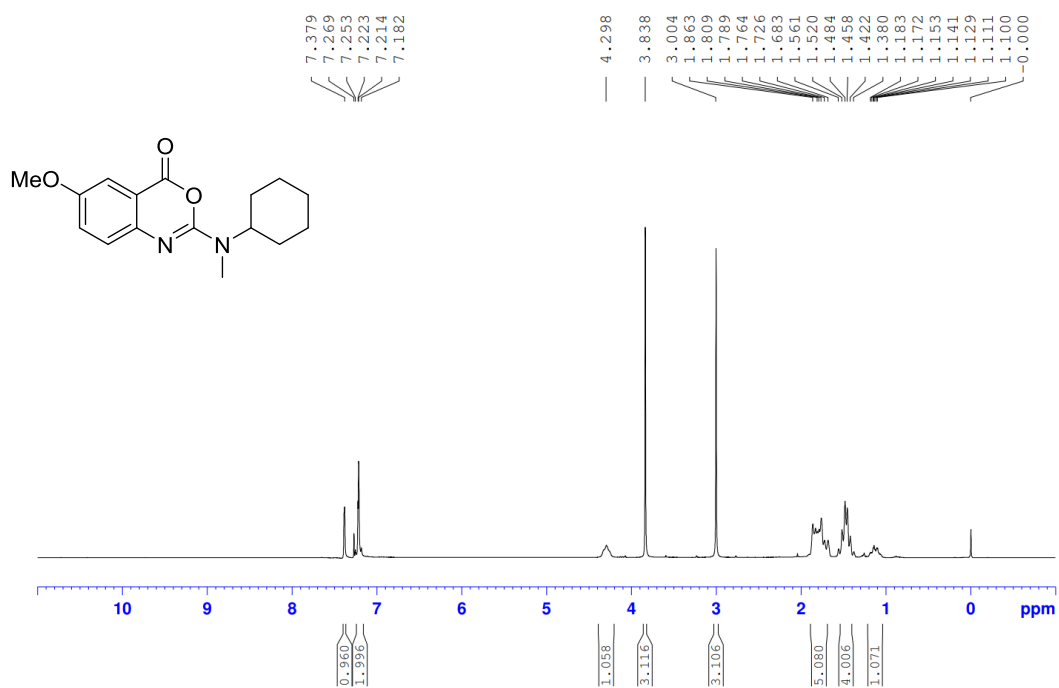

**Figure S-73** <sup>1</sup>H NMR spectrum of compound **5s** (300 MHz, CDCl<sub>3</sub>)

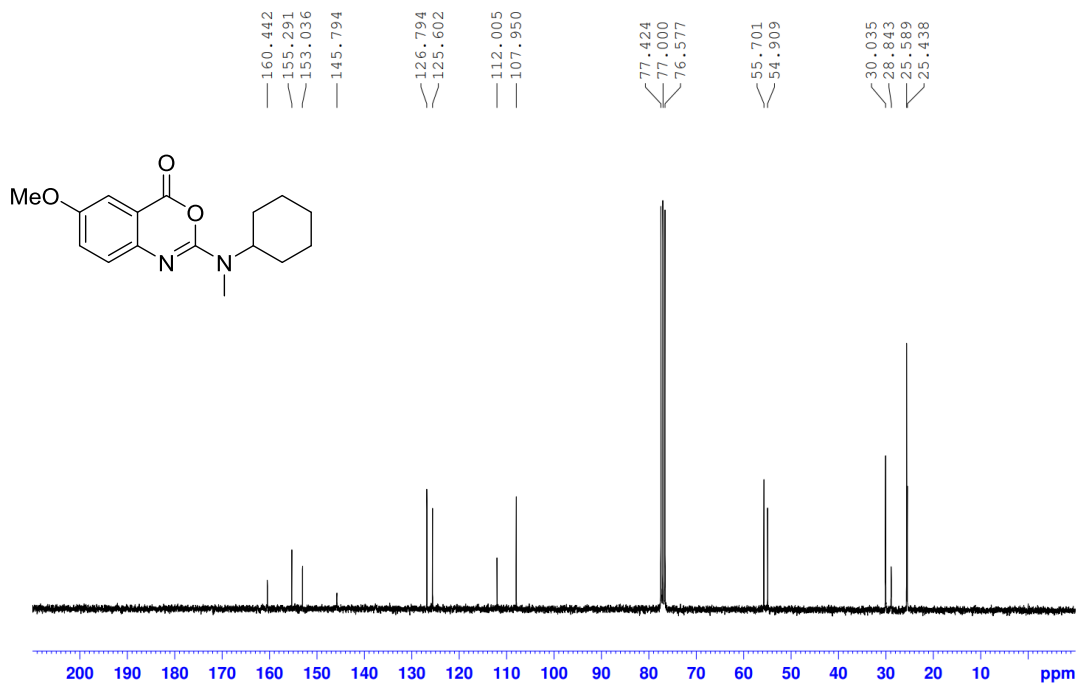

**Figure S-74** <sup>13</sup>C NMR spectrum of compound **5s** (75 MHz, CDCl<sub>3</sub>)

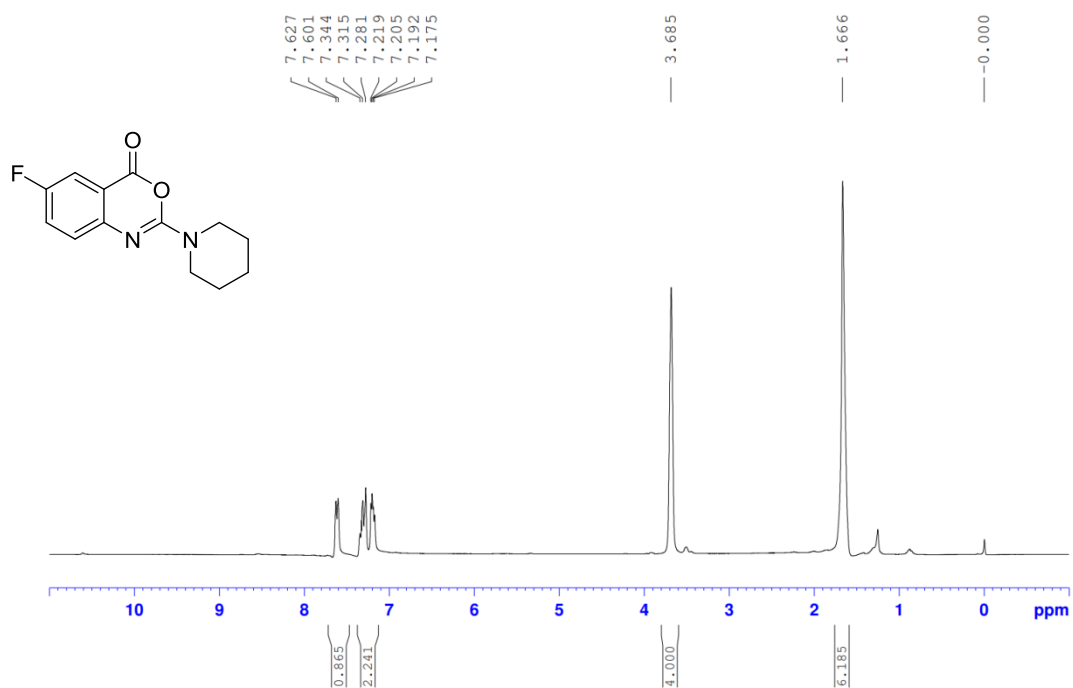

**Figure S-75**  $^1\text{H}$  NMR spectrum of compound **5t** (300 MHz,  $\text{CDCl}_3$ )

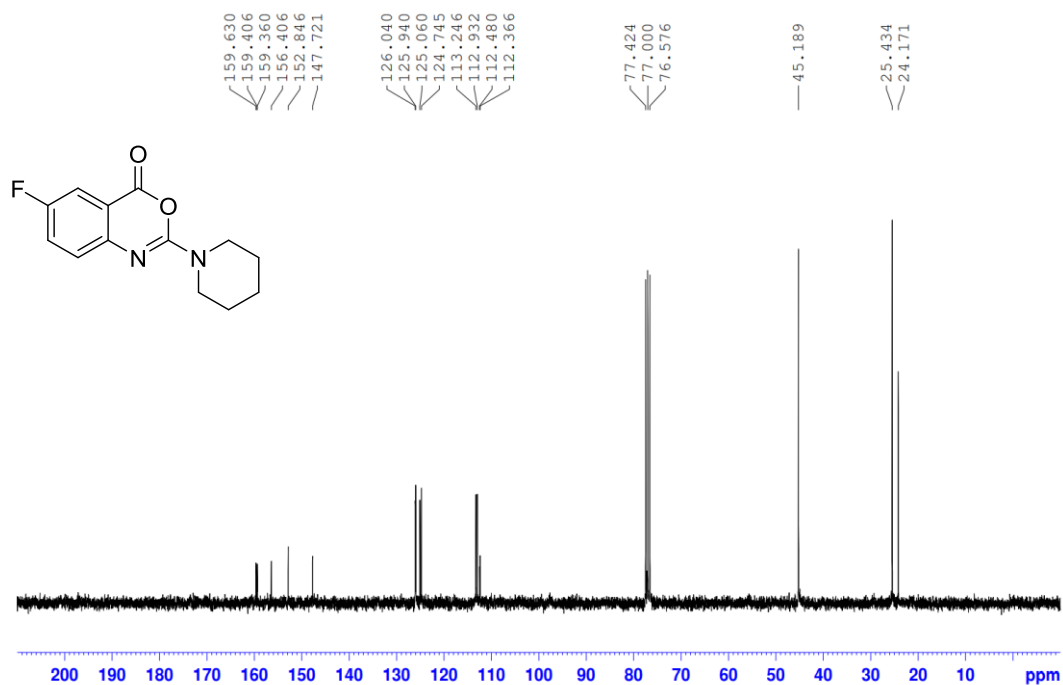

**Figure S-76**  $^{13}\text{C}$  NMR spectrum of compound **5t** (75 MHz,  $\text{CDCl}_3$ )

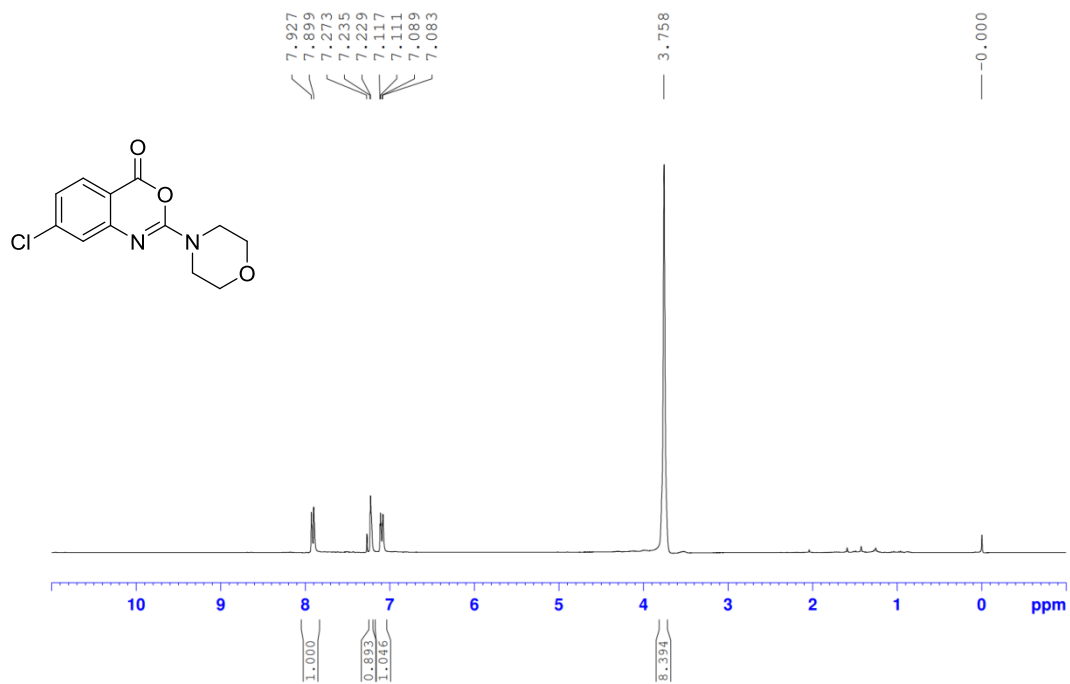

**Figure S-77**  $^1\text{H}$  NMR spectrum of compound **5u** (300 MHz,  $\text{CDCl}_3$ )

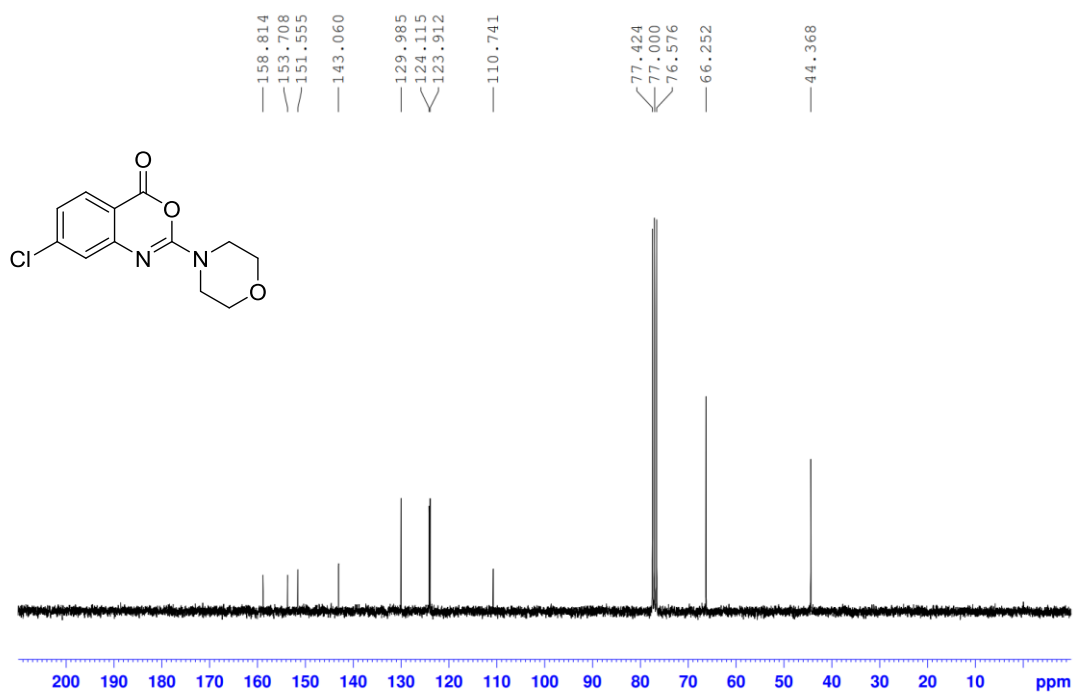

**Figure S-78**  $^{13}\text{C}$  NMR spectrum of compound **5u** (75 MHz,  $\text{CDCl}_3$ )

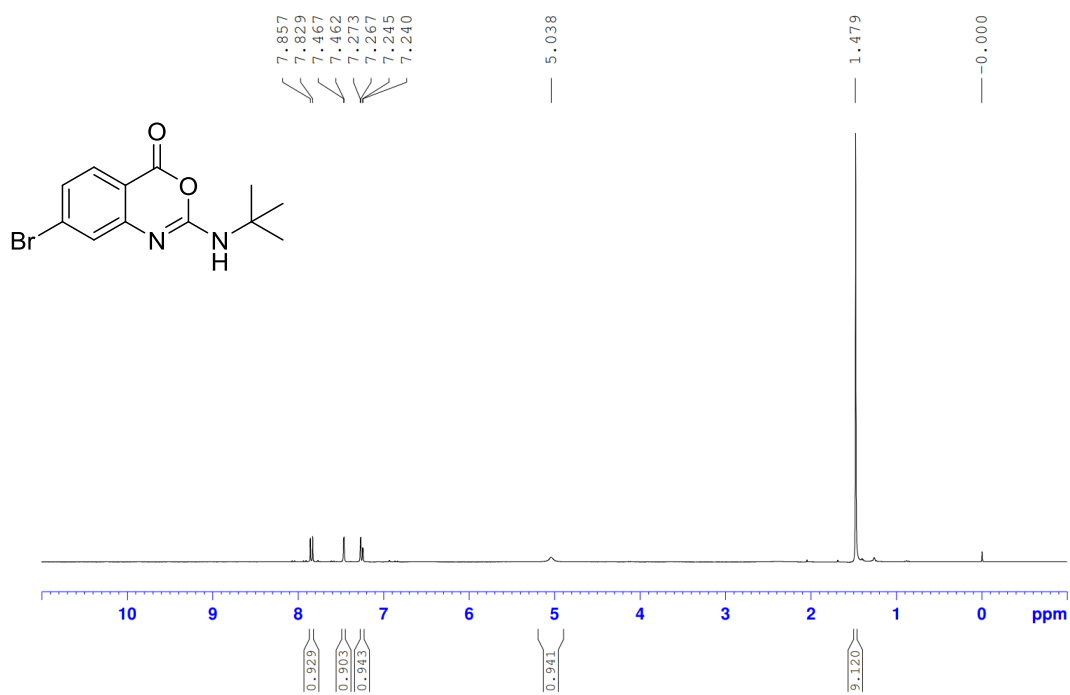

**Figure S-79** <sup>1</sup>H NMR spectrum of compound **5v** (300 MHz, CDCl<sub>3</sub>)

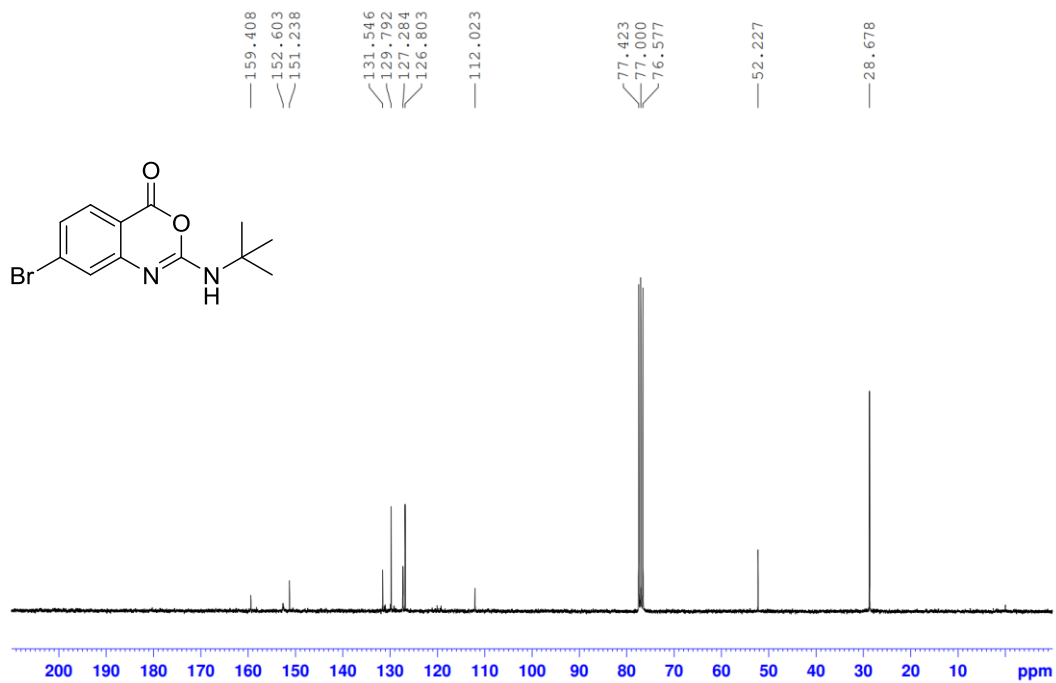

**Figure S-80** <sup>13</sup>C NMR spectrum of compound **5v** (75 MHz, CDCl<sub>3</sub>)

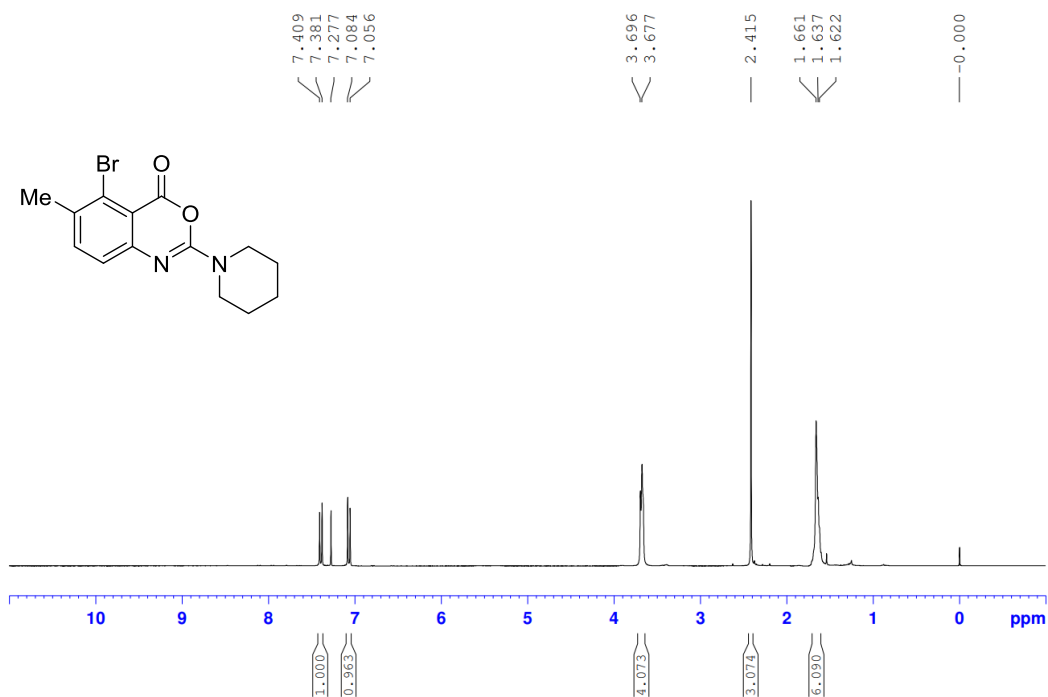

**Figure S-81**  $^1\text{H}$  NMR spectrum of compound **5w** (300 MHz,  $\text{CDCl}_3$ )

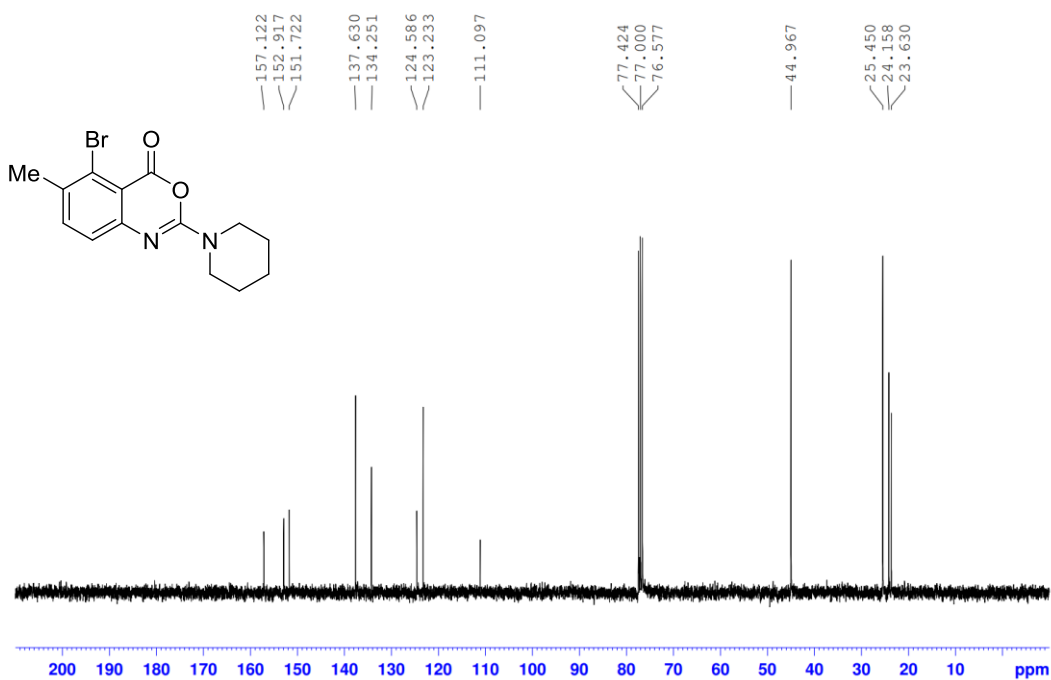

**Figure S-82**  $^{13}\text{C}$  NMR spectrum of compound **5w** (75 MHz,  $\text{CDCl}_3$ )

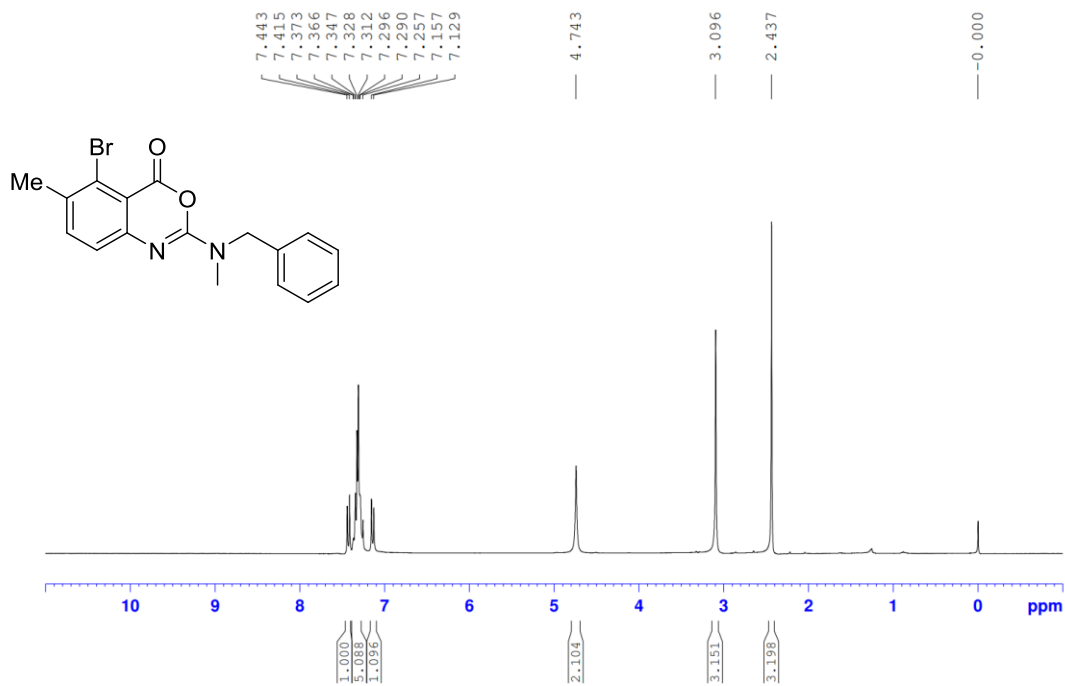

Figure S-83 <sup>1</sup>H NMR spectrum of compound **5x** (300 MHz, CDCl<sub>3</sub>)

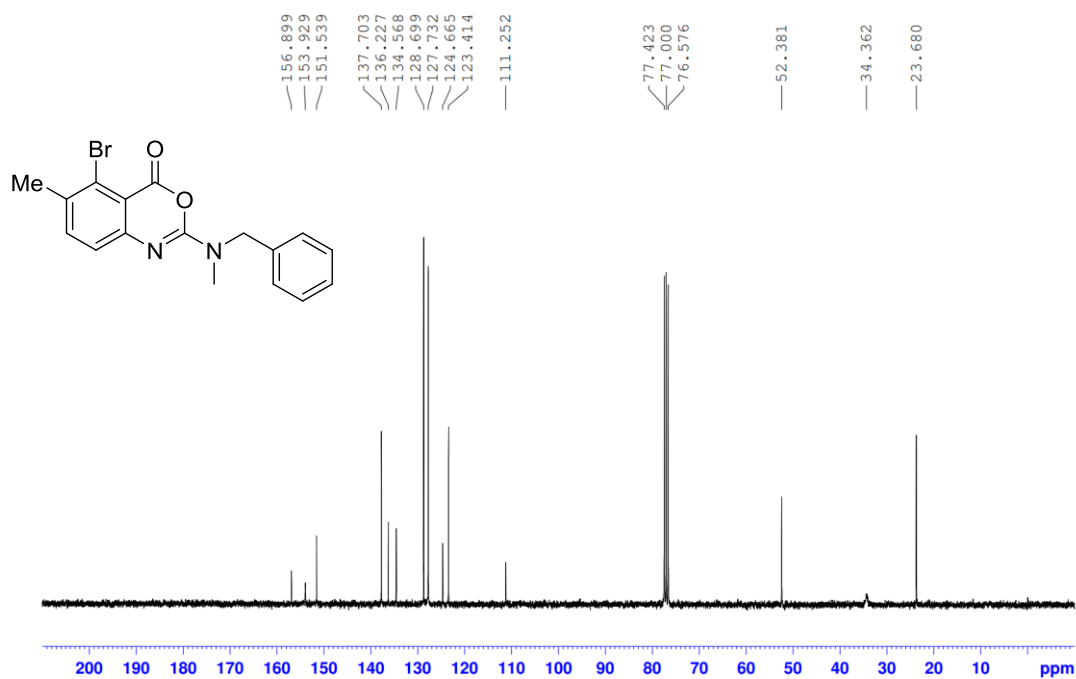

Figure S-84 <sup>13</sup>C NMR spectrum of compound **5x** (75 MHz, CDCl<sub>3</sub>)



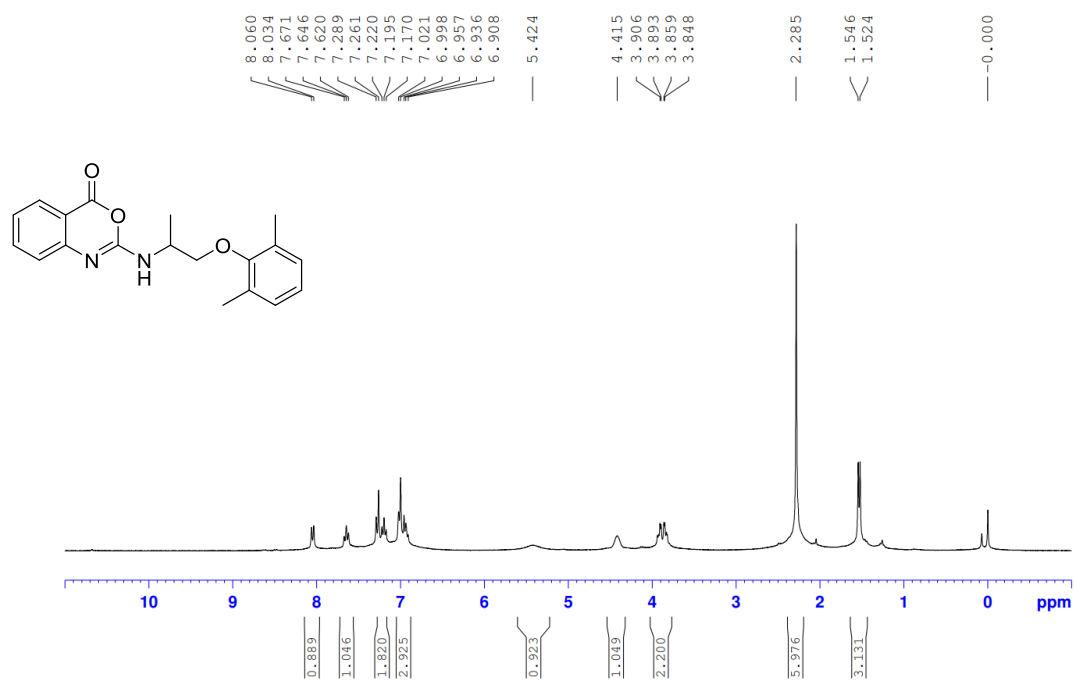

**Figure S-85** <sup>1</sup>H NMR spectrum of compound **6** (300 MHz, CDCl<sub>3</sub>)

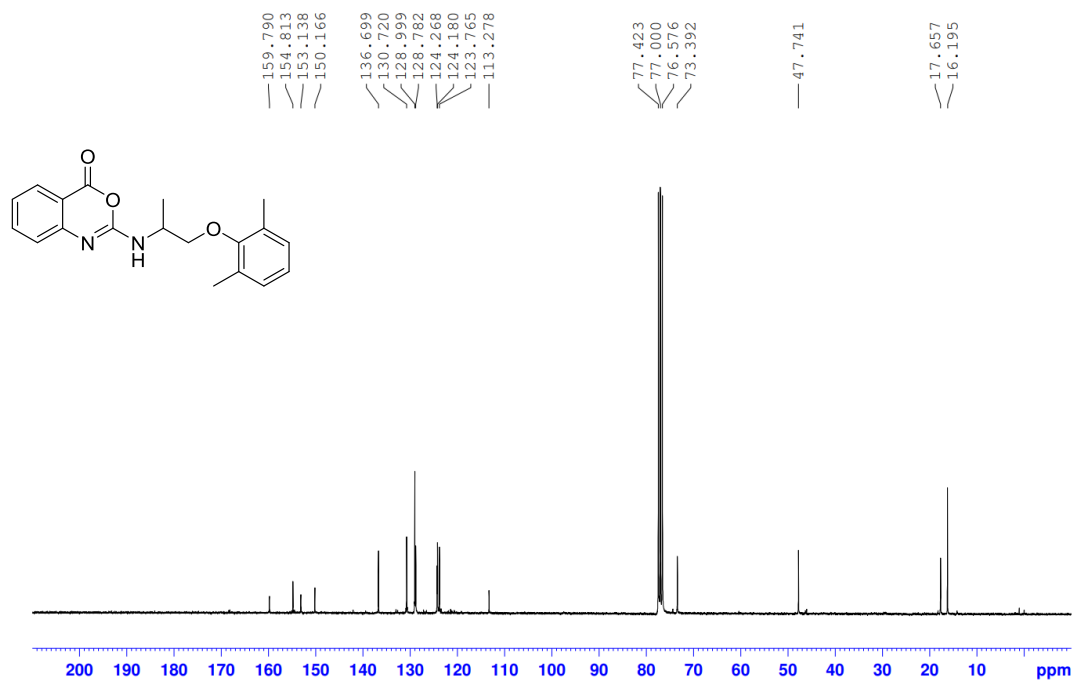

**Figure S-86** <sup>13</sup>C NMR spectrum of compound **6** (75 MHz, CDCl<sub>3</sub>)

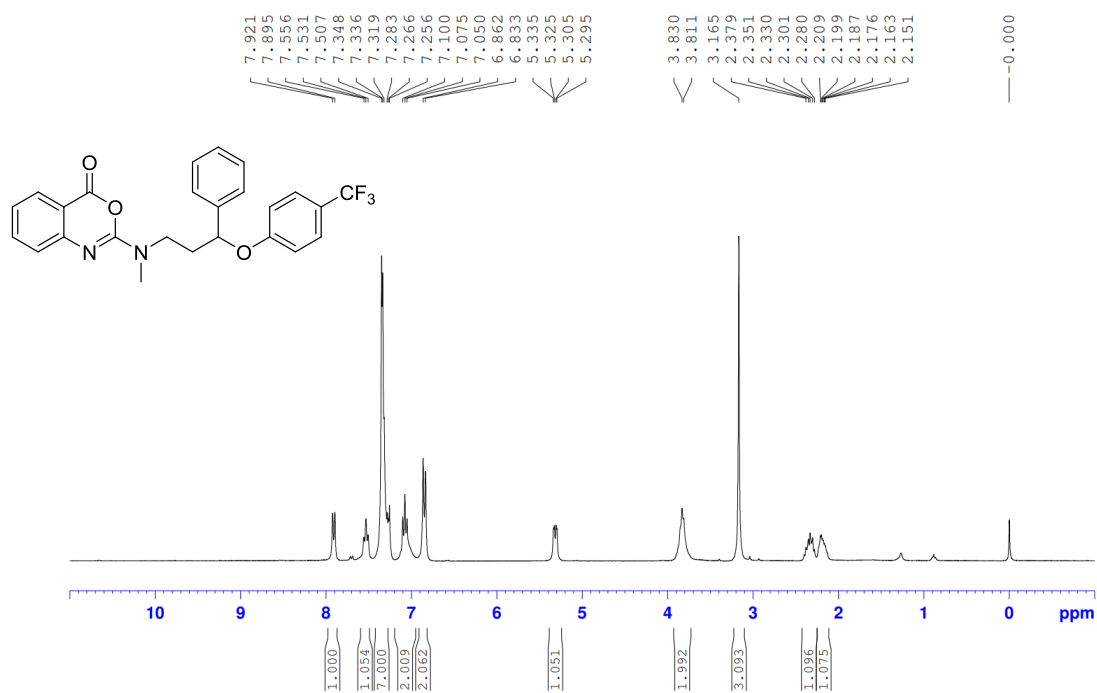

Figure S-87 <sup>1</sup>H NMR spectrum of compound 7 (300 MHz, CDCl<sub>3</sub>)

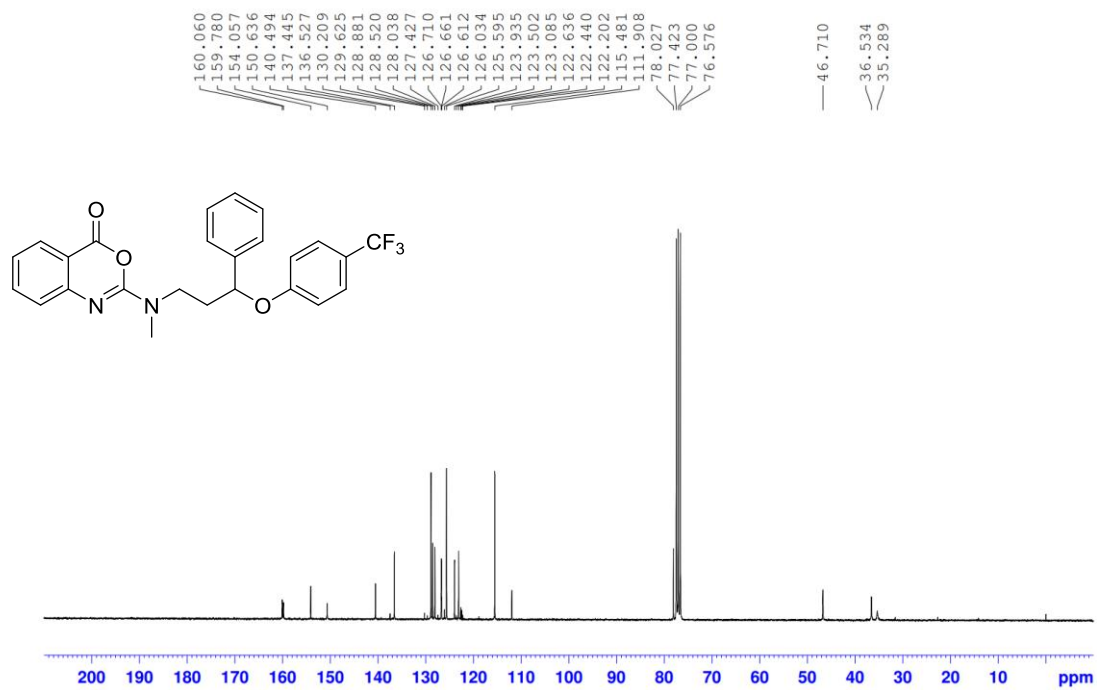

Figure S-88 <sup>13</sup>C NMR spectrum of compound 7 (75 MHz, CDCl<sub>3</sub>)

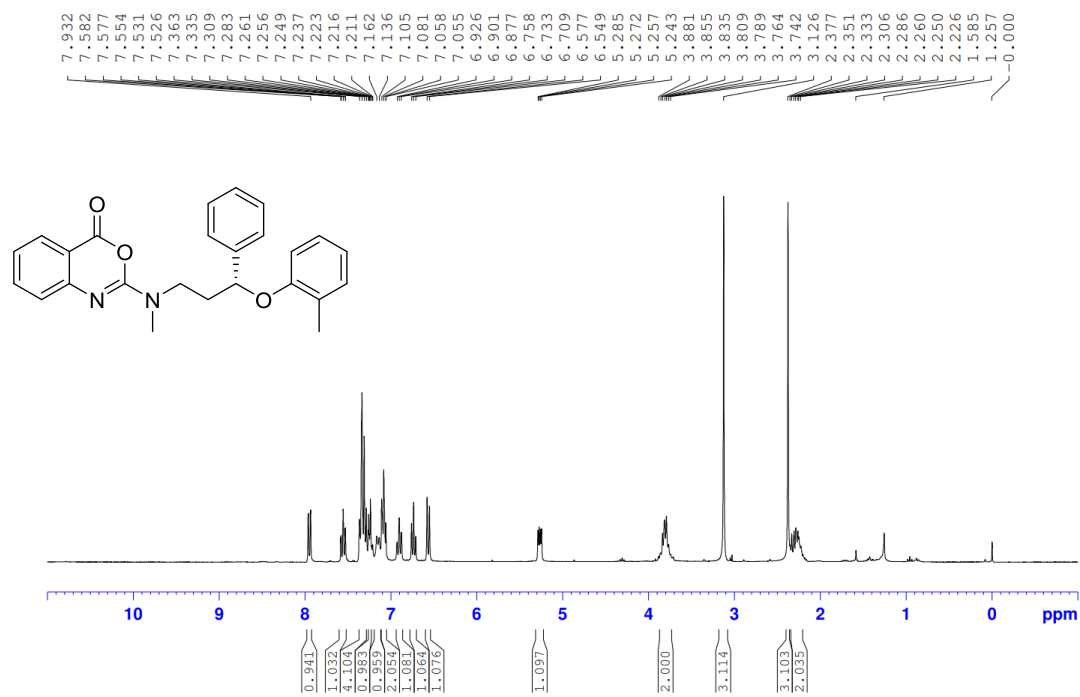

Figure S-89 <sup>1</sup>H NMR spectrum of compound 8 (300 MHz, CDCl<sub>3</sub>)

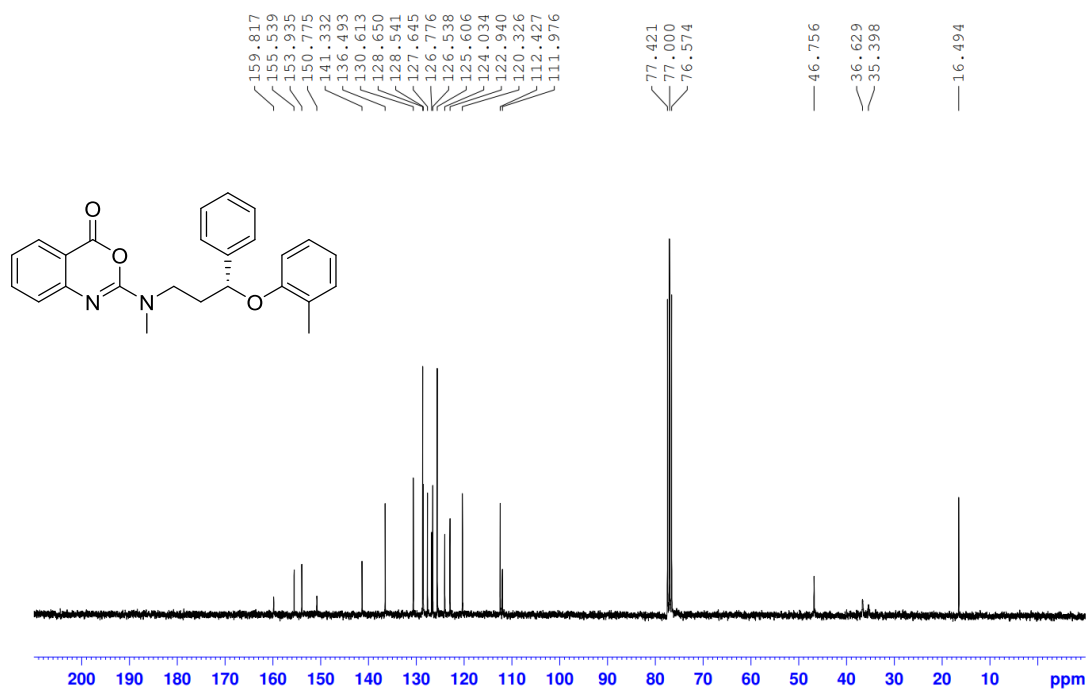

Figure S-90 <sup>13</sup>C NMR spectrum of compound 8 (75 MHz, CDCl<sub>3</sub>)
